# Supplementary material for: Analyzing the Genetic Characteristics of a Tryptophan-overproducing Escherichia Coli
Source: Research Square preprint supplement (doi:10.21203/rs.3.rs-122063/v1), 2020-12-09
Supplement: Supplementary file 2 [file c5953a807d20a338b42809e1.xlsx]

## Sheet: TPD5-RM3vsTPD5_GO_enrichment
	Table S7 Gene Ontology (GO) enrichment analysis of the differentially expressed genes between TPD5-RM3 and TPD5
	GO_accession	Description	Over_represented_pValue	Corrected_pValue	Up	Up_Gene_names	Down	Down_Gene_names
	GO:0044237	cellular metabolic process	5.7017e-12	1.8799e-08	73	b3167,b2565,b2507,b0169,b1285,b2508,b3305,b2903,b3651,b3295,b2566,b3787,b3702,b3294,b0739,b0948,b3306,b0924,b3168,b3813,b3299,b3169,b0470,b2890,b3829,b4200,b0949,b2185,b3310,b3986,b3165,b1247,b2422,b3298,b3988,b4178,b4064,b3304,b0981,b2741,b3097,b3987,b3132,b1653,b0984,b3983,b0742,b4440,b0911,b2581,b3166,b1435,b0096,b4376,b3303,b0184,b1262,b3307,b0629,b2388,b2606,b2383,b0809,b4180,b3783,b2608,b12…	153	b2020,b0080,b1480,b1344,b3744,b1270,b0002,b1275,b2019,b4539,b3067,b4211,b2675,b2029,b0208,b4396,b4025,b4383,b4209,b0586,b0058,b2379,b3342,b2416,b4041,b0659,b2143,b3341,b2926,b4129,b1982,b3405,b4293,b0674,b3928,b1280,b3501,b4361,b3210,b1189,b1570,b0015,b2063,b3923,b1656,b1642,b0438,b2154,b4212,b2520,b1059,b3343,b1702,b3774,b4479,b1912,b2617,b0060,b2290,b0487,b1114,b0439,b2463,b0999,b4340,b3187,b34…
	GO:0034645	cellular macromolecule biosynthetic process	1.1432e-10	1.577e-07	43	b3306,b0924,b0739,b3299,b0470,b3169,b1435,b0169,b1285,b4440,b3294,b3702,b3305,b2508,b3295,b3983,b4179,b2289,b0981,b3298,b4178,b3988,b3783,b3304,b3297,b3987,b1653,b2741,b3986,b4376,b2890,b0949,b4200,b3310,b2185,b0629,b3165,b2606,b1247,b0809,b3303,b0184,b3307	76	b4129,b3487,b3237,b0882,b3399,b1341,b1162,b0026,b0417,b3928,b3501,b1280,b3210,b4324,b4361,b4259,b1130,b4293,b3405,b0662,b2105,b0002,b1275,b3067,b1323,b0080,b1129,b1480,b3744,b2217,b0240,b4041,b3342,b0069,b2675,b1477,b0208,b4383,b4396,b3010,b0060,b0487,b2617,b2409,b1303,b0999,b3178,b4479,b3931,b1237,b4043,b3418,b4340,b0893,b1422,b2592,b4401,b1136,b3602,b2667,b3357,b0680,b3226,b3066,b0113,b0755,b27…
	GO:0034641	cellular nitrogen compound metabolic process	1.628e-10	1.577e-07	62	b3168,b3299,b0470,b3169,b3813,b0948,b0739,b3306,b0924,b3295,b3651,b3305,b2508,b2903,b3294,b3702,b2566,b2565,b3167,b1285,b0169,b2507,b2741,b3987,b1653,b3304,b4064,b3298,b2422,b4178,b3988,b1247,b3165,b4200,b0949,b3310,b2185,b2890,b3986,b3166,b1435,b0911,b2581,b3983,b4440,b0984,b3297,b3783,b4180,b2608,b4179,b1260,b2289,b0184,b1262,b3307,b3303,b0809,b0629,b2606,b2388,b4376	116	b3405,b4293,b0674,b1280,b3501,b3210,b4361,b3928,b2143,b0659,b1982,b2926,b4129,b4383,b4025,b4396,b2029,b2675,b0208,b0058,b0586,b4041,b3342,b3744,b0080,b2020,b1344,b1480,b1275,b3067,b4539,b2019,b1270,b0002,b2615,b3602,b3418,b4340,b2592,b2622,b0231,b2011,b4171,b3942,b3343,b4479,b3774,b0999,b0060,b0487,b2617,b0439,b1114,b2154,b0438,b4212,b1642,b1059,b1570,b1189,b0662,b4259,b1130,b4324,b0417,b0026,b33…
	GO:0010467	gene expression	1.9132e-10	1.577e-07	47	b3986,b2890,b4200,b0949,b3310,b2185,b0629,b3165,b2606,b0809,b1247,b3303,b3307,b4179,b2289,b3298,b2422,b3988,b4178,b3304,b3783,b4180,b2608,b3297,b3987,b1653,b2741,b0169,b1285,b3167,b4440,b3294,b3305,b2508,b3295,b3651,b3983,b3306,b2581,b0924,b0739,b0948,b3299,b3169,b0470,b3166,b1435	80	b3499,b2667,b3357,b0680,b3932,b3426,b1189,b3226,b0755,b0113,b1570,b2709,b0416,b1594,b1059,b1827,b1642,b0438,b4212,b0487,b2617,b0439,b1303,b2409,b0999,b3500,b3178,b3343,b4479,b4171,b3931,b3179,b1237,b4043,b3418,b4340,b0893,b2592,b1422,b1136,b4401,b3602,b2105,b0002,b0116,b1275,b3067,b1323,b0080,b1129,b1480,b3744,b2217,b0240,b4041,b3342,b0069,b1477,b0208,b4383,b3010,b4396,b4129,b3487,b3237,b0882,b06…
	GO:0044238	primary metabolic process	2.6379e-10	1.7395e-07	74	b3702,b3294,b3787,b3295,b3651,b2903,b2508,b3305,b1285,b2507,b0169,b2565,b3167,b3299,b0470,b3169,b3813,b3013,b0924,b3306,b0948,b0739,b1247,b3165,b2278,b3986,b2185,b3310,b4200,b0949,b3829,b2890,b3132,b1653,b3987,b2741,b0981,b4064,b3304,b3988,b4178,b2384,b2422,b3298,b4440,b1845,b3983,b0984,b1435,b3166,b2581,b2587,b0911,b0809,b2388,b2606,b0629,b0740,b3307,b0184,b1262,b3303,b4376,b0096,b1263,b0221,b32…	152	b1829,b2379,b3342,b4041,b0058,b0586,b4209,b4396,b4025,b4383,b0208,b4211,b2675,b2029,b4539,b3067,b2019,b1275,b0002,b3744,b1480,b0080,b2020,b4361,b3210,b1280,b3501,b0688,b3928,b0674,b3405,b4293,b1982,b0585,b4129,b2926,b3341,b2143,b0659,b1059,b4212,b2509,b0438,b2154,b1642,b3923,b2063,b0759,b1570,b0015,b1189,b3349,b0231,b3433,b4171,b2011,b3602,b2615,b2622,b1779,b2592,b4340,b3418,b0118,b3187,b2463,b09…
	GO:0009059	macromolecule biosynthetic process	5.0234e-10	2.2763e-07	43	b0169,b1285,b2508,b3305,b3983,b3295,b4440,b3702,b3294,b0739,b3306,b0924,b1435,b3299,b3169,b0470,b2890,b4200,b0949,b2185,b3310,b3986,b4376,b3303,b0184,b3307,b3165,b0629,b2606,b1247,b0809,b3298,b4178,b3988,b3304,b3783,b4179,b2289,b0981,b2741,b3987,b3297,b1653	76	b0080,b1129,b1480,b3744,b2217,b2105,b0002,b1275,b1323,b3067,b2675,b1477,b0208,b3010,b4396,b4383,b0240,b3342,b4041,b0069,b1341,b1162,b3399,b0026,b3487,b3237,b4129,b0882,b1130,b4259,b3405,b4293,b0662,b3928,b0417,b3501,b1280,b4361,b4324,b3210,b3226,b3066,b0755,b0113,b1570,b2709,b2667,b0680,b3357,b1642,b0438,b4212,b1594,b0416,b1827,b3863,b1059,b3178,b4479,b2617,b0487,b0060,b0999,b1303,b2409,b4340,b08…
	GO:0006807	nitrogen compound metabolic process	5.1092e-10	2.2763e-07	64	b3303,b0184,b1262,b3307,b0629,b2388,b2606,b0809,b4376,b3297,b1263,b4180,b3783,b2608,b1260,b4179,b2289,b3983,b4440,b0984,b3166,b1435,b0911,b2581,b3165,b1247,b2890,b3829,b4200,b0949,b2185,b3310,b3986,b2741,b3987,b1653,b3298,b2422,b4178,b3988,b3304,b4064,b2508,b3305,b2903,b3651,b3295,b2566,b3702,b3294,b3167,b2565,b2507,b0169,b1285,b3168,b3813,b0470,b3299,b3169,b0739,b0948,b3306,b0924	126	b1594,b0416,b4350,b3863,b1827,b3426,b3226,b3066,b0113,b0755,b2709,b0529,b2667,b3499,b0680,b3357,b3932,b3635,b0867,b0893,b1422,b1136,b4401,b3607,b3179,b3931,b1237,b4043,b3500,b3805,b3178,b2409,b1303,b1477,b3010,b0240,b0480,b0069,b1129,b2217,b2105,b0415,b0116,b1323,b1130,b4259,b0662,b0417,b4324,b1341,b1162,b3399,b0026,b3237,b3487,b2696,b0059,b0882,b1642,b0438,b2154,b4212,b1059,b1189,b1570,b2063,b43…
	GO:0071704	organic substance metabolic process	5.5233e-10	2.2763e-07	76	b3305,b2508,b2903,b3651,b3295,b2566,b3787,b3294,b3702,b3167,b2565,b0169,b2507,b1285,b3168,b3013,b3813,b3299,b3169,b0470,b0739,b0948,b3306,b0924,b3165,b1247,b2890,b3829,b4200,b0949,b3310,b2185,b3986,b2278,b2741,b3987,b1653,b3132,b2422,b3298,b2384,b3988,b4178,b4064,b3304,b0981,b3983,b1845,b4440,b0984,b3166,b1435,b0911,b2587,b2581,b3303,b0184,b1262,b3307,b0740,b0629,b2606,b2388,b0809,b0096,b4376,b07…	161	b2029,b2675,b4211,b0208,b4383,b4396,b4025,b4209,b0586,b0058,b4041,b3342,b2379,b1829,b0080,b2020,b1344,b1480,b3744,b1270,b0002,b1275,b2019,b4539,b3067,b3405,b4293,b0674,b3928,b0688,b3501,b1280,b3210,b4361,b0659,b2143,b3341,b4129,b2926,b1982,b0585,b1642,b2154,b0438,b2509,b4212,b1059,b1189,b0015,b1570,b0759,b2063,b3923,b0118,b3418,b3187,b4340,b2592,b2622,b1779,b2615,b3602,b2011,b3942,b4171,b3433,b04…
	GO:0043170	macromolecule metabolic process	6.5437e-10	2.3972e-07	61	b3987,b1653,b2741,b0981,b2422,b3298,b2384,b3988,b4178,b3304,b4064,b3165,b1247,b3986,b2278,b2890,b4200,b0949,b3310,b2185,b3299,b3169,b0470,b3306,b0924,b0739,b0948,b3294,b3702,b3305,b2508,b2903,b3295,b3651,b0169,b1285,b3167,b2565,b3297,b4179,b2289,b3783,b4180,b2608,b0629,b2606,b0809,b3303,b0184,b3307,b0740,b4376,b3166,b1435,b2581,b0911,b2587,b4440,b3983,b1845,b0984	114	b2011,b4171,b0231,b3349,b3418,b4340,b2592,b2622,b3602,b0487,b0060,b2617,b1114,b0439,b0999,b3343,b4479,b1059,b1642,b2154,b0438,b4212,b1189,b0015,b1570,b3928,b1280,b3501,b3210,b4361,b4293,b3405,b4129,b0585,b0659,b0058,b4041,b3342,b1829,b2675,b0208,b4383,b4396,b4209,b0002,b1275,b4539,b3067,b0080,b1480,b3744,b3931,b3179,b1237,b1612,b4043,b0893,b1422,b4401,b1136,b0643,b2409,b1303,b3178,b3500,b3498,b26…
	GO:0044249	cellular biosynthetic process	1.8711e-09	5.7986e-07	49	b1435,b3983,b4440,b3783,b1260,b4179,b2289,b0736,b3297,b0096,b4376,b0184,b3307,b3303,b0809,b0629,b2606,b0739,b3306,b0924,b3299,b3169,b0470,b3813,b1285,b2507,b0169,b3295,b2508,b3305,b3702,b3294,b3304,b3298,b4178,b3988,b0981,b2741,b3987,b1653,b4200,b0949,b2185,b3310,b2890,b3829,b3986,b1247,b3165	99	b0026,b1341,b1162,b3399,b0882,b3237,b3487,b0662,b1130,b4259,b4324,b0417,b2217,b1129,b0116,b1323,b2105,b4488,b0415,b3010,b1109,b1477,b0069,b0240,b3178,b3805,b2409,b1303,b4401,b1136,b3607,b0893,b1422,b1237,b4043,b3931,b0755,b0113,b2709,b0529,b3426,b3066,b3226,b2667,b0680,b3357,b1594,b0416,b1827,b3863,b3341,b4129,b4293,b3405,b0674,b1280,b3501,b4361,b3210,b3928,b3744,b2020,b0080,b1480,b1344,b1275,b30…
	GO:0009058	biosynthetic process	1.9346e-09	5.7986e-07	49	b3306,b0924,b0739,b3299,b3169,b0470,b3813,b1285,b2507,b0169,b3702,b3294,b3295,b2508,b3305,b0981,b3304,b3298,b4178,b3988,b3987,b1653,b2741,b3986,b4200,b0949,b2185,b3310,b2890,b3829,b1247,b3165,b1435,b4440,b3983,b1260,b4179,b2289,b3783,b3297,b0736,b4376,b0096,b0809,b0629,b2606,b0184,b3307,b3303	110	b4129,b3341,b1280,b3501,b4361,b3210,b3928,b3405,b4293,b0674,b1275,b2019,b3067,b1270,b0002,b3744,b0080,b2020,b1480,b1344,b0586,b2379,b3342,b4041,b4025,b4396,b4383,b4211,b2675,b0208,b0999,b2617,b2290,b0487,b0060,b1912,b3774,b4479,b4171,b3433,b3602,b2615,b4340,b3418,b3187,b1779,b2592,b3923,b0759,b1570,b1059,b0438,b4212,b1642,b0882,b3487,b3237,b0026,b1162,b1341,b3399,b4324,b0417,b0662,b1130,b4259,b01…
	GO:0044260	cellular macromolecule metabolic process	2.5817e-09	6.4222e-07	56	b4376,b3303,b0184,b3307,b0629,b2606,b0809,b4180,b3783,b2608,b4179,b2289,b3297,b0984,b3983,b4440,b0911,b2581,b3166,b1435,b2890,b0949,b4200,b2185,b3310,b3986,b3165,b1247,b3298,b2422,b4178,b3988,b4064,b3304,b0981,b2741,b3987,b1653,b3167,b2565,b0169,b1285,b2508,b3305,b2903,b3651,b3295,b3702,b3294,b0739,b0948,b3306,b0924,b3299,b0470,b3169	105	b3426,b3226,b3066,b0755,b0113,b2709,b3401,b2667,b3499,b0680,b3357,b3932,b3635,b1594,b4350,b0416,b1827,b3863,b3500,b3178,b2614,b1303,b2409,b0893,b1422,b1136,b4401,b3179,b3931,b1237,b4043,b1612,b1129,b2217,b2105,b0116,b4142,b1323,b1477,b3010,b0473,b0240,b0069,b1341,b1162,b3399,b0026,b3237,b3487,b2696,b0059,b0882,b1130,b4259,b0662,b0417,b4324,b1189,b1570,b0015,b1642,b0438,b4212,b1059,b3343,b4479,b26…
	GO:0097159	organic cyclic compound binding	2.7271e-09	6.4222e-07	56	b2741,b3097,b3987,b1653,b3298,b2422,b3988,b4064,b0981,b1247,b4469,b2890,b4200,b0949,b2185,b3168,b3813,b3169,b0470,b0948,b4375,b0924,b3305,b3651,b3295,b2566,b3787,b3702,b2507,b3014,b0221,b1084,b3783,b4180,b4179,b3303,b0184,b0629,b2388,b0809,b4376,b4291,b3166,b1435,b1378,b0911,b1246,b4289,b3162,b4201,b2581,b2584,b4440,b3296,b0984,b3652	128	b3418,b4340,b4143,b2592,b2622,b1779,b3602,b1687,b3942,b4171,b3433,b0425,b3021,b2620,b0231,b0242,b1702,b3774,b2290,b0060,b0487,b0439,b1114,b2463,b1642,b0438,b2509,b2133,b1059,b1189,b1570,b0759,b4293,b3405,b0611,b3928,b3210,b4361,b0956,b4129,b4173,b2675,b2029,b4211,b4383,b2516,b0154,b4396,b2810,b0058,b0586,b4041,b2379,b0080,b2020,b1344,b3744,b1270,b0002,b0660,b3067,b2016,b0893,b1136,b4401,b2552,b09…
	GO:1901363	heterocyclic compound binding	2.7271e-09	6.4222e-07	56	b0221,b3783,b1084,b4180,b4179,b0184,b3303,b0809,b2388,b0629,b4376,b1435,b3166,b4291,b1378,b4289,b1246,b0911,b2581,b3162,b4201,b2584,b3296,b4440,b3652,b0984,b3097,b2741,b1653,b3987,b4064,b3988,b3298,b2422,b0981,b1247,b2185,b0949,b4200,b2890,b4469,b3168,b3169,b0470,b3813,b4375,b0948,b0924,b3651,b3295,b3305,b3702,b3787,b2566,b3014,b2507	128	b2552,b0928,b1136,b4401,b2016,b0893,b1612,b4043,b3340,b1237,b3931,b0014,b3179,b2210,b2614,b1978,b0039,b3500,b3178,b1303,b1827,b3863,b0416,b4350,b1594,b0529,b2709,b1413,b0113,b3066,b3226,b2895,b3426,b3635,b3932,b3357,b1380,b0680,b2667,b0662,b0966,b4259,b1130,b4324,b3400,b3129,b0026,b1162,b0882,b0059,b2696,b0879,b0473,b1109,b3010,b1477,b3486,b0069,b4575,b2217,b0488,b1129,b3780,b1323,b0116,b4488,b21…
	GO:1901576	organic substance biosynthetic process	3.7811e-09	8.3109e-07	49	b0096,b4376,b3303,b0184,b3307,b0629,b2606,b0809,b3783,b1260,b4179,b2289,b0736,b3297,b3983,b4440,b1435,b3829,b2890,b0949,b4200,b2185,b3310,b3986,b3165,b1247,b3298,b4178,b3988,b3304,b0981,b2741,b3987,b1653,b2507,b0169,b1285,b2508,b3305,b3295,b3702,b3294,b0739,b3306,b0924,b3813,b3299,b0470,b3169	102	b3426,b3226,b3066,b0755,b0113,b2709,b0529,b2667,b3357,b0680,b1594,b0416,b1827,b3863,b3178,b3805,b2409,b1303,b0893,b2016,b1422,b4401,b1136,b3607,b3931,b1237,b4043,b1129,b2217,b2105,b0415,b4488,b0116,b1323,b1477,b3010,b1109,b0240,b0069,b1162,b1341,b3399,b0026,b3237,b3487,b0882,b1130,b4259,b0662,b0417,b4324,b1570,b0759,b3923,b1642,b0438,b4212,b1059,b3774,b4479,b1912,b2617,b0487,b0060,b0999,b4340,b31…
	GO:0008152	metabolic process	6.059e-09	1.2485e-06	84	ma	194	b3501,b4293,b0243,b1982,b3341,b2143,b0659,b4041,b3342,b2379,b2416,b0058,b4383,b4396,b4025,b0208,b2029,b3067,b0002,b0660,b3744,b1480,b3349,b3433,b0425,b2011,b4171,b2615,b3602,b2592,b3187,b2463,b0487,b2290,b0060,b1912,b4175,b4479,b3774,b1702,b2133,b2509,b0872,b4212,b1642,b2063,b0759,b0015,b2579,b3770,b0662,b4259,b1130,b4014,b0059,b3487,b3237,b0026,b3399,b1162,b0069,b4575,b0240,b0473,b1477,b0415,b21…
	GO:0044271	cellular nitrogen compound biosynthetic process	1.9301e-08	3.7432e-06	40	b0739,b3306,b0924,b1435,b3813,b3299,b3169,b0169,b2507,b1285,b3305,b2508,b3295,b3983,b4440,b3294,b3298,b4178,b3988,b3304,b3783,b4179,b2289,b2741,b3297,b3987,b1653,b2890,b0949,b4200,b3310,b2185,b3986,b3303,b3307,b0629,b3165,b2606,b1247,b0809	79	b1162,b1341,b0026,b4129,b3487,b3237,b0882,b1130,b4293,b3405,b0662,b0674,b3928,b3501,b1280,b4324,b3210,b4361,b0080,b1344,b1480,b1129,b3744,b2217,b2105,b1270,b0002,b0415,b1275,b3067,b1323,b1477,b0208,b4383,b3010,b4396,b0586,b0240,b4041,b3342,b0069,b3805,b3178,b4479,b3774,b0487,b2617,b1303,b2409,b0999,b3418,b4340,b0893,b2592,b1422,b1136,b4401,b2615,b3602,b3931,b1237,b4043,b3066,b3226,b0113,b0755,b05…
	GO:0016070	RNA metabolic process	4.5403e-08	8.3164e-06	31	b3167,b1285,b2508,b3651,b3295,b4440,b0911,b0739,b0948,b0924,b2581,b1435,b3166,b3169,b0470,b2890,b0949,b0629,b0809,b1247,b3988,b4178,b2422,b2608,b4180,b3783,b2289,b4179,b2741,b1653,b3987	80	b1129,b0080,b2217,b3744,b0002,b2105,b1323,b3067,b4539,b1275,b0116,b0208,b1477,b4396,b3010,b4383,b0240,b0058,b0069,b1162,b1341,b0659,b0026,b3487,b3237,b4129,b0059,b0882,b2696,b1130,b0662,b4293,b3405,b3928,b4361,b4324,b3210,b3501,b3066,b3226,b1189,b3426,b2709,b1570,b0755,b0113,b3357,b0680,b3499,b2667,b1642,b4212,b0438,b1059,b1827,b1594,b0416,b4479,b3343,b3178,b3500,b0439,b2617,b0487,b0999,b2409,b13…
	GO:0005488	binding	1.8607e-07	3.2289e-05	69	b4290,b1247,b4200,b0949,b3011,b2185,b3829,b4469,b2890,b2741,b3097,b3987,b1653,b3132,b4064,b2422,b3298,b2384,b3988,b0981,b3651,b3295,b3305,b2508,b4323,b3787,b3702,b2566,b3014,b2507,b3168,b0470,b3169,b3102,b3813,b0948,b4375,b0924,b0184,b3303,b0809,b0629,b2388,b2206,b4376,b0221,b1084,b3783,b4180,b2672,b4179,b0742,b2584,b3990,b3296,b4440,b0984,b3652,b3166,b1435,b4291,b1378,b1246,b4289,b0911,b2581,b31…	157	b0438,b0872,b2509,b1642,b1635,b2520,b1059,b2133,b0015,b1570,b1189,b0492,b1656,b1094,b0759,b1920,b3602,b3418,b4340,b2732,b4143,b2592,b2622,b1779,b3021,b2620,b0231,b0242,b1687,b4171,b3942,b3433,b0425,b1702,b3774,b2463,b2290,b0487,b0060,b0439,b1114,b4383,b2516,b0154,b4396,b2810,b2029,b2675,b4211,b1829,b0058,b0586,b4041,b2379,b3744,b2020,b0080,b1344,b2019,b3067,b1270,b0660,b0002,b4293,b3405,b0611,b27…
	GO:0090304	nucleic acid metabolic process	4.9107e-07	8.0294e-05	38	b0949,b2890,b1247,b4064,b2422,b3988,b4178,b2741,b3987,b1653,b2565,b3167,b1285,b3295,b3651,b2508,b2903,b3702,b0948,b0739,b0924,b3169,b0470,b4376,b0184,b0809,b0629,b4180,b3783,b2608,b4179,b2289,b0984,b4440,b0911,b2581,b3166,b1435	94	b1570,b1189,b0438,b4212,b1642,b1059,b3343,b4479,b0999,b2617,b0060,b0487,b0439,b1114,b3602,b4340,b3418,b2622,b2592,b0231,b4171,b2011,b3744,b0080,b1275,b3067,b4539,b0002,b4396,b4383,b2675,b0208,b0058,b4041,b0659,b4129,b4293,b3405,b3501,b4361,b3210,b3928,b0113,b0755,b2709,b3426,b3066,b3226,b3932,b3635,b3499,b2667,b0680,b3357,b1594,b0416,b4350,b3863,b1827,b3178,b3500,b1303,b2409,b1136,b4401,b0893,b14…
	GO:1901360	organic cyclic compound metabolic process	5.1143e-07	8.0294e-05	43	b2289,b1260,b4179,b2608,b4180,b3783,b2388,b0629,b0809,b1262,b0184,b4376,b1435,b3166,b2581,b0911,b4440,b0984,b1653,b3987,b2741,b4178,b3988,b2422,b4064,b1247,b2890,b0949,b3813,b3169,b0470,b0924,b0739,b0948,b3702,b2903,b2508,b3651,b3295,b2507,b1285,b3167,b2565	114	b3179,b3931,b4043,b1237,b1422,b0893,b2016,b1136,b4401,b2409,b1303,b3805,b3178,b3500,b1827,b3863,b1594,b0416,b4350,b3357,b0680,b2667,b3499,b3635,b3932,b3066,b3226,b3426,b2709,b0529,b0113,b0755,b0417,b4324,b1130,b4259,b0662,b3487,b3237,b0059,b0882,b2696,b1162,b1341,b3399,b0026,b0480,b0240,b0069,b1477,b3010,b0415,b2105,b1323,b0116,b1129,b2217,b4171,b2011,b0231,b2622,b2592,b4340,b3418,b3602,b2615,b04…
	GO:0019538	protein metabolic process	5.4321e-07	8.1407e-05	27	b3307,b0740,b3303,b1247,b2606,b3165,b3310,b2185,b0949,b4200,b2890,b2278,b3986,b3297,b3304,b3298,b2384,b1845,b3983,b3305,b3294,b0984,b0169,b1435,b3299,b2587,b3306	37	b2154,b1642,b0015,b3226,b3932,b0680,b3401,b1136,b2592,b0893,b1612,b3349,b4043,b2614,b3498,b3178,b0439,b0643,b0473,b1829,b4041,b3342,b3233,b0488,b3744,b1129,b1480,b4142,b0881,b0662,b4324,b1280,b3928,b0026,b0882,b0585,b4129
	GO:0046483	heterocycle metabolic process	7.5779e-07	0.00010863	43	b3166,b1435,b0911,b2581,b4440,b0984,b3783,b4180,b2608,b4179,b1260,b2289,b1262,b0184,b0809,b0629,b2388,b4376,b3169,b0470,b3813,b0948,b0739,b0924,b3295,b3651,b2508,b2903,b3702,b2565,b3167,b1285,b2507,b2741,b3987,b1653,b4064,b2422,b3988,b4178,b1247,b0949,b2890	111	b0662,b4259,b1130,b4324,b0417,b0026,b3399,b1341,b1162,b2696,b0882,b0059,b3487,b3237,b3010,b1477,b0069,b0240,b0480,b2217,b1129,b0116,b1323,b2105,b0415,b4401,b1136,b0893,b1422,b1237,b4043,b3931,b3179,b3805,b3500,b3178,b2409,b1303,b4350,b0416,b1594,b1827,b3863,b0113,b0755,b0529,b2709,b3426,b3066,b3226,b3932,b3635,b2667,b3499,b0680,b3357,b4293,b3405,b3501,b3210,b4361,b3928,b2143,b0659,b1982,b2926,b41…
	GO:0006725	cellular aromatic compound metabolic process	1.0583e-06	0.00014539	43	b3813,b0470,b3169,b0739,b0948,b0924,b2903,b2508,b3651,b3295,b3702,b3167,b2565,b2507,b1285,b2741,b1653,b3987,b4178,b3988,b2422,b4064,b1247,b2890,b0949,b1435,b3166,b0911,b2581,b4440,b0984,b2608,b4180,b3783,b2289,b1260,b4179,b0184,b1262,b2388,b0629,b0809,b4376	111	b4293,b3405,b3928,b4361,b3210,b3501,b0659,b2143,b4129,b2926,b1982,b0208,b2675,b2029,b4396,b4025,b4383,b4041,b0058,b0586,b1344,b2020,b0080,b3744,b0002,b1270,b2019,b4539,b3067,b1275,b2622,b2592,b4340,b3418,b3602,b2615,b4171,b2011,b0231,b3774,b4479,b3343,b1114,b0439,b2617,b0060,b0487,b0999,b1642,b4212,b0438,b2154,b1059,b2520,b1189,b1570,b1130,b4259,b0662,b0417,b4324,b1341,b1162,b3399,b0026,b3487,b32…
	GO:0003676	nucleic acid binding	2.2661e-06	0.00029886	44	b0470,b3169,b4291,b3166,b1435,b3162,b4201,b2581,b0924,b0911,b0948,b2566,b4440,b3296,b3702,b3305,b3295,b3651,b3014,b0984,b3652,b3987,b1653,b2741,b3097,b4179,b0981,b2422,b3298,b3988,b4064,b1084,b3783,b4180,b0629,b1247,b0809,b3303,b0184,b4376,b2890,b4200,b0949,b2185	73	b3400,b3928,b3129,b4324,b4361,b4259,b1130,b0966,b3405,b4293,b0611,b4129,b2696,b0882,b0059,b1162,b0956,b0058,b0586,b4041,b3486,b0069,b1477,b4383,b2516,b3010,b4396,b2105,b1270,b0660,b3067,b3780,b0080,b2217,b3931,b3179,b0014,b0231,b3021,b1237,b2620,b0242,b4043,b3418,b4340,b2592,b2622,b4401,b3602,b0487,b0060,b1114,b0439,b1303,b4350,b0416,b1594,b1827,b3863,b1059,b1642,b0438,b2509,b2667,b3357,b3932,b36…
	GO:0019222	regulation of metabolic process	2.395e-06	0.00030256	20	b3702,b4440,b0742,b2508,b1285,b3169,b1435,b0924,b0948,b0739,b0911,b0809,b1247,b0629,b0949,b1653,b3097,b2741,b2289,b4178	60	b0069,b4041,b0240,b4383,b4396,b3010,b0208,b1477,b3067,b1323,b1275,b0002,b2105,b2217,b1129,b0080,b4324,b3210,b4361,b1280,b3501,b3928,b4293,b3405,b1130,b0882,b2696,b3237,b1341,b1162,b1827,b0416,b1594,b4212,b0438,b1642,b3932,b3357,b2667,b2709,b1570,b0755,b0113,b3226,b4043,b1237,b3931,b3602,b4401,b1422,b2592,b3418,b4340,b2409,b1303,b0999,b0487,b2617,b4479,b3178
	GO:0006139	nucleobase-containing compound metabolic process	2.4777e-06	0.00030256	41	b0924,b0739,b0948,b3813,b0470,b3169,b2507,b1285,b3167,b2565,b3702,b2508,b2903,b3295,b3651,b2422,b3988,b4178,b4064,b3987,b1653,b2741,b2890,b0949,b1247,b2581,b0911,b3166,b1435,b0984,b4440,b4179,b2289,b3783,b4180,b2608,b4376,b0629,b2388,b0809,b0184	102	b2926,b4129,b1982,b0659,b2143,b3928,b3501,b3210,b4361,b3405,b4293,b0002,b1275,b3067,b4539,b0080,b3744,b0058,b0586,b4041,b2675,b2029,b0208,b4383,b4025,b4396,b0487,b0060,b2617,b1114,b0439,b0999,b3343,b4479,b2011,b4171,b0231,b3418,b4340,b2592,b2622,b2615,b3602,b1189,b1570,b1059,b1642,b0438,b4212,b3237,b3487,b2696,b0882,b0059,b3399,b1341,b1162,b0026,b0417,b4324,b4259,b1130,b0662,b2105,b0116,b1323,b11…
	GO:0030529	ribonucleoprotein complex	3.3515e-06	0.00039464	17	b3306,b0169,b3986,b3310,b2185,b3304,b4200,b3298,b3294,b3299,b2606,b3297,b3165,b3307,b3983,b3305,b3303	7	b3067,b0059,b1480,b4350,b3928,b3342,b0662
	GO:0009987	cellular process	3.6881e-06	0.0004193	85	b3415,b1260,b4179,b2289,b4180,b3783,b1084,b2608,b2672,b1263,b3297,b0221,b0736,b4376,b0096,b0845,b2383,b0809,b0629,b2388,b2606,b0184,b1262,b3307,b3303,b2581,b1634,b2587,b0911,b3166,b1435,b4159,b0984,b4440,b3983,b0742,b0981,b3304,b4064,b3298,b2422,b4178,b3988,b0457,b3987,b3132,b1653,b2741,b3097,b2278,b3986,b4200,b0949,b2185,b3310,b3829,b2890,b1663,b1247,b3165,b3306,b0924,b0948,b4375,b0739,b3299,b31…	169	b2409,b1303,b3956,b1978,b1683,b2614,b3805,b3500,b3178,b1237,b4043,b1612,b2210,b0014,b3179,b3931,b1271,b4401,b1136,b3607,b0893,b2016,b1422,b3932,b4015,b3635,b3499,b2667,b3401,b3357,b2829,b0680,b0113,b0755,b2709,b0529,b3426,b3226,b3066,b2106,b1594,b4350,b1681,b0416,b3863,b1827,b2696,b0059,b4014,b0882,b3237,b3487,b0026,b1162,b1341,b3399,b3770,b4324,b3129,b0417,b0662,b1130,b4259,b0116,b4142,b1323,b21…
	GO:0003723	RNA binding	4.3615e-06	0.00047933	21	b3169,b3166,b4179,b2581,b0911,b3298,b3783,b1084,b4180,b0948,b2566,b1247,b3702,b3296,b3305,b3303,b3651,b2890,b2185,b4200,b0949	17	b3931,b3400,b0242,b4361,b2620,b2592,b0611,b0439,b4129,b0882,b0059,b2696,b4041,b0058,b0416,b3486,b0438
	GO:0080090	regulation of primary metabolic process	4.8218e-06	0.00049661	17	b0924,b0911,b0739,b3169,b1435,b1285,b3702,b4440,b2508,b2289,b4178,b1653,b2741,b0949,b1247,b0809,b0629	59	b0882,b2696,b3237,b1341,b1162,b4361,b4324,b3210,b1280,b3501,b3928,b3405,b4293,b1130,b1323,b3067,b1275,b0002,b2105,b2217,b1129,b0080,b0069,b4041,b0240,b3010,b4396,b4383,b0208,b1477,b0999,b1303,b2409,b2617,b0487,b4479,b3178,b4043,b1237,b3931,b3602,b4401,b2592,b1422,b4340,b3418,b3357,b2667,b1570,b2709,b0113,b0755,b3226,b1827,b1594,b0416,b4212,b0438,b1642
	GO:0000166	nucleotide binding	4.9707e-06	0.00049661	24	b4289,b4375,b1246,b3162,b0924,b3168,b3813,b0470,b3652,b2507,b2584,b2566,b3702,b3787,b2422,b3783,b0981,b1653,b0221,b2890,b0949,b2388,b0809,b1247	71	b1162,b0026,b4173,b0879,b4129,b0882,b0059,b0662,b3210,b4361,b1129,b2020,b3780,b0488,b3744,b0002,b0660,b1270,b1323,b0116,b2675,b2029,b4211,b0473,b4383,b1109,b4041,b4575,b3486,b0039,b3774,b3500,b3178,b1702,b2614,b1978,b0439,b1114,b0060,b1303,b2463,b2592,b1779,b2016,b0893,b4143,b1136,b3433,b3931,b0425,b3179,b2210,b1687,b3942,b4171,b1612,b3340,b1189,b2895,b3426,b0529,b2709,b1570,b1413,b0680,b1380,b07…
	GO:1901265	nucleoside phosphate binding	4.9707e-06	0.00049661	24	b1653,b0221,b3783,b2422,b0981,b1247,b0809,b2388,b0949,b2890,b3168,b0470,b3813,b4289,b4375,b1246,b0924,b3162,b2584,b3702,b3787,b2566,b3652,b2507	71	b1136,b2592,b1779,b2016,b4143,b0893,b1612,b3340,b3931,b3433,b0425,b3179,b2210,b1687,b4171,b3942,b2614,b1978,b0039,b3774,b3500,b3178,b1702,b1303,b2463,b1114,b0439,b0060,b0438,b1059,b4350,b2133,b0529,b1570,b2709,b1413,b1189,b2895,b3426,b1380,b0680,b0759,b0662,b3210,b4361,b0026,b1162,b0882,b0059,b4173,b0879,b4129,b0473,b4383,b1109,b2675,b2029,b4211,b3486,b4575,b4041,b0488,b3744,b1129,b3780,b2020,b13…
	GO:0031323	regulation of cellular metabolic process	6.7345e-06	0.00065305	18	b0949,b0629,b0809,b1247,b4178,b2289,b3097,b2741,b1653,b1285,b2508,b0742,b4440,b3702,b0739,b0924,b1435,b3169	58	b3226,b1570,b2709,b0113,b0755,b3357,b2667,b1642,b4212,b0438,b1827,b0416,b1594,b4479,b3178,b0487,b2617,b1303,b2409,b0999,b1422,b2592,b3418,b4340,b3602,b4401,b3931,b4043,b1237,b1129,b0080,b2217,b0002,b2105,b3067,b1323,b1275,b0208,b1477,b4383,b4396,b3010,b4041,b0240,b0069,b1162,b1341,b3237,b0882,b1130,b3405,b4293,b3928,b4324,b3210,b4361,b1280,b3501
	GO:0009889	regulation of biosynthetic process	9.1773e-06	0.00079625	16	b1653,b2741,b2289,b4178,b1247,b0809,b0629,b0949,b3169,b1435,b0924,b0739,b3702,b4440,b2508,b1285	58	b4043,b1237,b3931,b3602,b4401,b2592,b1422,b3418,b4340,b1303,b2409,b0999,b0487,b2617,b4479,b3178,b1827,b0416,b1594,b4212,b0438,b1642,b3357,b2667,b1570,b2709,b0755,b0113,b3226,b4324,b3210,b4361,b3501,b1280,b3928,b4293,b3405,b1130,b0882,b3237,b1341,b1162,b0069,b4041,b0240,b4383,b4396,b3010,b0208,b1477,b3067,b1323,b1275,b0002,b2105,b2217,b1129,b0080
	GO:0010556	regulation of macromolecule biosynthetic process	9.1773e-06	0.00079625	16	b3702,b4440,b2508,b1285,b3169,b1435,b0924,b0739,b0809,b1247,b0629,b0949,b1653,b2741,b2289,b4178	58	b0069,b4041,b0240,b4383,b3010,b4396,b0208,b1477,b3067,b1323,b1275,b0002,b2105,b2217,b1129,b0080,b4324,b3210,b4361,b3501,b1280,b3928,b4293,b3405,b1130,b0882,b3237,b1341,b1162,b1827,b0416,b1594,b4212,b0438,b1642,b3357,b2667,b2709,b1570,b0755,b0113,b3226,b4043,b1237,b3931,b3602,b4401,b1422,b2592,b3418,b4340,b2409,b1303,b0999,b0487,b2617,b4479,b3178
	GO:0031326	regulation of cellular biosynthetic process	9.1773e-06	0.00079625	16	b1653,b2741,b2289,b4178,b0809,b1247,b0629,b0949,b3169,b1435,b0924,b0739,b3702,b4440,b2508,b1285	58	b4043,b1237,b3931,b3602,b4401,b2592,b1422,b3418,b4340,b1303,b2409,b0999,b0487,b2617,b4479,b3178,b1827,b0416,b1594,b4212,b0438,b1642,b3357,b2667,b1570,b2709,b0755,b0113,b3226,b4324,b3210,b4361,b3501,b1280,b3928,b3405,b4293,b1130,b0882,b3237,b1341,b1162,b0069,b4041,b0240,b4383,b4396,b3010,b0208,b1477,b3067,b1323,b1275,b0002,b2105,b2217,b1129,b0080
	GO:2000112	regulation of cellular macromolecule biosynthetic process	9.1773e-06	0.00079625	16	b2741,b1653,b4178,b2289,b0629,b1247,b0809,b0949,b1435,b3169,b0739,b0924,b2508,b4440,b3702,b1285	58	b2592,b1422,b3418,b4340,b3602,b4401,b3931,b4043,b1237,b4479,b3178,b0487,b2617,b2409,b1303,b0999,b1642,b4212,b0438,b1827,b0416,b1594,b3226,b2709,b1570,b0113,b0755,b3357,b2667,b1130,b3405,b4293,b3928,b4324,b3210,b4361,b3501,b1280,b1341,b1162,b3237,b0882,b0208,b1477,b4383,b4396,b3010,b4041,b0240,b0069,b1129,b0080,b2217,b0002,b2105,b3067,b1323,b1275
	GO:0006351	transcription, DNA-templated	1.0473e-05	0.0008632	20	b1285,b4440,b2508,b3295,b0924,b0739,b3169,b1435,b0949,b0629,b1247,b0809,b2289,b4179,b4178,b3988,b3783,b1653,b3987,b2741	58	b0002,b2105,b3067,b1323,b1275,b1129,b0080,b2217,b0240,b0069,b0208,b1477,b4383,b3010,b4396,b3237,b3487,b0882,b1341,b1162,b3928,b4324,b3210,b4361,b3501,b1130,b4293,b3405,b3357,b2667,b3226,b2709,b1570,b0113,b0755,b1059,b1827,b0416,b1594,b1642,b4212,b0438,b0487,b2617,b2409,b1303,b0999,b4479,b3178,b3931,b4043,b1237,b1422,b2592,b3418,b4340,b3602,b4401
	GO:0097659	nucleic acid-templated transcription	1.0473e-05	0.0008632	20	b1285,b2508,b3295,b4440,b0739,b0924,b1435,b3169,b0949,b0629,b1247,b0809,b4178,b3988,b3783,b2289,b4179,b2741,b1653,b3987	58	b1129,b0080,b2217,b0002,b2105,b1323,b3067,b1275,b0208,b1477,b4396,b3010,b4383,b0240,b0069,b1341,b1162,b3487,b3237,b0882,b1130,b3405,b4293,b3928,b4361,b4324,b3210,b3501,b3226,b2709,b1570,b0755,b0113,b3357,b2667,b1642,b4212,b0438,b1059,b1827,b1594,b0416,b4479,b3178,b2617,b0487,b0999,b2409,b1303,b1422,b2592,b4340,b3418,b3602,b4401,b3931,b4043,b1237
	GO:0051171	regulation of nitrogen compound metabolic process	1.0812e-05	0.00086945	16	b0629,b1247,b0809,b0949,b2741,b1653,b4178,b2289,b2508,b4440,b3702,b1285,b1435,b3169,b0739,b0924	58	b1642,b0438,b4212,b0416,b1594,b1827,b3226,b0113,b0755,b1570,b2709,b2667,b3357,b3418,b4340,b1422,b2592,b4401,b3602,b3931,b1237,b4043,b3178,b4479,b0487,b2617,b1303,b2409,b0999,b1477,b0208,b4383,b3010,b4396,b0240,b4041,b0069,b0080,b1129,b2217,b2105,b0002,b1275,b3067,b1323,b1130,b3405,b4293,b3928,b1280,b3501,b4324,b3210,b4361,b1341,b1162,b3237,b0882
	GO:0032774	RNA biosynthetic process	1.2344e-05	0.00096897	20	b1435,b3169,b0739,b0924,b3295,b2508,b4440,b1285,b2741,b3987,b1653,b3783,b4178,b3988,b4179,b2289,b1247,b0809,b0629,b0949	59	b3405,b4293,b1130,b3501,b4361,b4324,b3210,b3928,b1341,b1162,b0882,b3487,b3237,b4396,b3010,b4383,b1477,b0208,b0069,b0240,b2217,b0080,b1129,b1275,b1323,b3067,b2105,b0002,b4401,b3602,b4340,b3418,b1422,b2592,b1237,b4043,b3931,b3178,b4479,b0999,b2409,b1303,b2617,b0487,b0438,b4212,b1642,b1594,b0416,b1827,b1059,b0113,b0755,b2709,b1570,b3226,b3066,b2667,b3357
	GO:0060255	regulation of macromolecule metabolic process	1.384e-05	0.0010611	17	b4178,b2289,b2741,b1653,b0949,b1247,b0809,b0629,b0948,b0739,b0924,b1435,b3169,b1285,b2508,b3702,b4440	59	b3178,b4479,b0999,b2409,b1303,b2617,b0487,b4401,b3602,b4340,b3418,b2592,b1422,b1237,b4043,b3931,b0755,b0113,b2709,b1570,b3226,b3932,b2667,b3357,b0438,b4212,b1642,b1594,b0416,b1827,b1341,b1162,b0882,b3237,b4293,b3405,b1130,b3501,b1280,b4361,b4324,b3210,b3928,b2217,b0080,b1129,b1275,b1323,b3067,b2105,b0002,b4396,b3010,b4383,b1477,b0208,b0069,b0240,b4041
	GO:0010468	regulation of gene expression	1.4247e-05	0.0010675	16	b1285,b2508,b4440,b0948,b0739,b0924,b1435,b3169,b0949,b0809,b1247,b0629,b4178,b2289,b2741,b1653	59	b2217,b0080,b1129,b1275,b3067,b1323,b2105,b0002,b4383,b3010,b4396,b1477,b0208,b0069,b0240,b4041,b1341,b1162,b0882,b3237,b4293,b3405,b1130,b3501,b1280,b3210,b4324,b4361,b3928,b0113,b0755,b2709,b1570,b3226,b3932,b2667,b3357,b0438,b4212,b1642,b0416,b1594,b1827,b3178,b4479,b1303,b2409,b0999,b0487,b2617,b4401,b3602,b3418,b4340,b1422,b2592,b1237,b4043,b3931
	GO:0043228	non-membrane-bounded organelle	1.5087e-05	0.0011053	19	b3298,b4064,b4200,b3304,b2185,b3310,b3986,b0169,b3306,b3303,b3305,b3097,b3983,b3307,b3165,b3297,b2606,b3294,b3299	12	b1480,b1162,b3487,b2617,b0439,b3067,b0893,b0662,b3928,b3342,b4350,b1612
	GO:0044424	intracellular part	1.6127e-05	0.0011559	31	b3297,b4064,b3304,b3298,b3133,b4179,b3307,b3303,b2606,b3165,b3310,b2185,b4200,b2890,b4376,b3986,b1435,b4291,b3299,b3169,b0470,b2474,b3813,b0739,b3306,b3983,b3305,b2508,b3294,b3014,b0169	40	b3607,b1136,b2592,b0893,b1612,b0231,b3433,b1687,b1978,b3343,b0439,b2617,b1059,b4350,b0755,b3293,b3932,b0680,b3401,b1094,b0662,b3770,b1280,b3928,b1162,b0585,b0059,b4129,b3487,b0473,b4041,b3342,b0240,b3744,b1480,b1129,b2020,b3067,b2019,b4142
	GO:0043232	intracellular non-membrane-bounded organelle	1.7314e-05	0.0011893	18	b3298,b2185,b3310,b4200,b4064,b3304,b3986,b0169,b3306,b3303,b3305,b3307,b3983,b2606,b3165,b3297,b3299,b3294	10	b1162,b1480,b0439,b3067,b0893,b0662,b3928,b3342,b1612,b4350
	GO:0005840	ribosome	1.7818e-05	0.0011893	17	b3986,b0169,b3306,b3298,b2185,b3310,b3304,b4200,b2606,b3165,b3297,b3299,b3294,b3305,b3303,b3307,b3983	4	b1480,b3342,b4350,b0662
	GO:0043604	amide biosynthetic process	1.7925e-05	0.0011893	19	b3306,b3298,b3304,b3297,b3299,b0169,b3986,b2507,b2890,b3310,b2185,b4200,b2606,b3165,b3294,b3303,b3305,b3307,b3983	14	b0487,b4129,b0026,b1280,b0893,b0674,b0662,b1136,b0680,b1480,b0529,b3744,b4041,b3342
	GO:0004527	exonuclease activity	1.8036e-05	0.0011893	5	b0184,b0949,b3097,b0981,b4376	6	b2509,b3233,b3399,b3863,b0060,b2011
	GO:0005622	intracellular	1.9772e-05	0.0012782	32	b3296,b3294,b3983,b3305,b2508,b3014,b0169,b0470,b3299,b3169,b3813,b2474,b1435,b4291,b3306,b0739,b3165,b2606,b3307,b3303,b4376,b3986,b4200,b3310,b2185,b2890,b3297,b4179,b3133,b3304,b4064,b3298	43	b0240,b4041,b3342,b0473,b4142,b3067,b2019,b3744,b2020,b1480,b1129,b1280,b3770,b3928,b0662,b0059,b0585,b4129,b3487,b1162,b4350,b1059,b3932,b3635,b3293,b3401,b1094,b0680,b0755,b0113,b1237,b0231,b1612,b1687,b3433,b1136,b3607,b0893,b2592,b2617,b0439,b1978,b3343
	GO:0036094	small molecule binding	2.0766e-05	0.0013166	26	b2422,b3783,b0981,b1653,b0221,b4469,b2890,b0949,b2388,b1247,b0809,b1246,b4289,b4375,b3162,b0924,b3168,b3813,b1378,b0470,b3652,b2507,b2584,b2566,b3787,b3702	74	b3178,b3500,b1702,b0039,b3774,b1978,b2614,b0060,b1114,b0439,b1303,b2463,b2016,b4143,b0893,b2592,b1779,b1136,b2210,b1687,b3942,b4171,b3433,b3931,b0425,b3179,b3340,b1612,b2895,b3426,b1189,b1413,b0529,b1570,b2709,b0759,b1380,b0680,b0438,b2133,b4350,b1059,b1162,b0026,b4129,b3237,b4173,b0879,b0882,b0059,b0662,b3210,b4361,b3780,b2020,b1344,b1129,b0488,b3744,b1270,b0002,b4488,b0660,b0116,b1323,b2675,b20…
	GO:0019219	regulation of nucleobase-containing compound metabolic process	2.3117e-05	0.001438	16	b3169,b1435,b0924,b0739,b4440,b3702,b2508,b1285,b1653,b2741,b2289,b4178,b0629,b1247,b0809,b0949	56	b3928,b4324,b3210,b4361,b3501,b1130,b3405,b4293,b3237,b0882,b1162,b1341,b0240,b0069,b0208,b1477,b4383,b4396,b3010,b0002,b2105,b3067,b1323,b1275,b1129,b0080,b2217,b3931,b4043,b1237,b2592,b1422,b3418,b4340,b3602,b4401,b0487,b2617,b2409,b1303,b0999,b4479,b3178,b1827,b0416,b1594,b1642,b4212,b0438,b3357,b2667,b3226,b2709,b1570,b0113,b0755
	GO:0006355	regulation of transcription, DNA-templated	3.1674e-05	0.0018321	15	b0739,b0924,b1435,b3169,b1285,b2508,b4440,b4178,b2289,b2741,b1653,b0949,b1247,b0809,b0629	56	b1341,b1162,b0882,b3237,b3405,b4293,b1130,b3501,b3210,b4324,b4361,b3928,b2217,b0080,b1129,b1275,b3067,b1323,b2105,b0002,b4383,b4396,b3010,b1477,b0208,b0069,b0240,b3178,b4479,b2409,b1303,b0999,b0487,b2617,b4401,b3602,b3418,b4340,b2592,b1422,b1237,b4043,b3931,b0755,b0113,b1570,b2709,b3226,b2667,b3357,b0438,b4212,b1642,b0416,b1594,b1827
	GO:0051252	regulation of RNA metabolic process	3.1674e-05	0.0018321	15	b1653,b2741,b2289,b4178,b0629,b1247,b0809,b0949,b3169,b1435,b0924,b0739,b4440,b2508,b1285	56	b3931,b4043,b1237,b2592,b1422,b4340,b3418,b3602,b4401,b2617,b0487,b0999,b2409,b1303,b4479,b3178,b1827,b1594,b0416,b1642,b4212,b0438,b3357,b2667,b3226,b1570,b2709,b0755,b0113,b3928,b4361,b3210,b4324,b3501,b1130,b4293,b3405,b3237,b0882,b1341,b1162,b0240,b0069,b0208,b1477,b3010,b4396,b4383,b0002,b2105,b1323,b3067,b1275,b1129,b0080,b2217
	GO:1903506	regulation of nucleic acid-templated transcription	3.1674e-05	0.0018321	15	b0739,b0924,b1435,b3169,b1285,b2508,b4440,b4178,b2289,b2741,b1653,b0949,b1247,b0809,b0629	56	b1341,b1162,b0882,b3237,b3405,b4293,b1130,b4324,b3210,b4361,b3501,b3928,b2217,b1129,b0080,b3067,b1323,b1275,b0002,b2105,b4383,b3010,b4396,b0208,b1477,b0069,b0240,b4479,b3178,b2409,b1303,b0999,b0487,b2617,b3602,b4401,b2592,b1422,b3418,b4340,b4043,b1237,b3931,b2709,b1570,b0113,b0755,b3226,b3357,b2667,b4212,b0438,b1642,b1827,b0416,b1594
	GO:2001141	regulation of RNA biosynthetic process	3.1674e-05	0.0018321	15	b4178,b2289,b2741,b1653,b0949,b1247,b0809,b0629,b0739,b0924,b1435,b3169,b1285,b2508,b4440	56	b3178,b4479,b1303,b2409,b0999,b0487,b2617,b4401,b3602,b3418,b4340,b2592,b1422,b1237,b4043,b3931,b0755,b0113,b1570,b2709,b3226,b2667,b3357,b0438,b4212,b1642,b0416,b1594,b1827,b1162,b1341,b0882,b3237,b3405,b4293,b1130,b3501,b4324,b3210,b4361,b3928,b2217,b0080,b1129,b1275,b3067,b1323,b2105,b0002,b4383,b3010,b4396,b1477,b0208,b0069,b0240
	GO:0003735	structural constituent of ribosome	4.2557e-05	0.0024192	17	b3299,b3294,b2606,b3165,b3297,b3307,b3983,b3305,b3303,b3306,b3986,b0169,b2185,b3310,b3304,b4200,b3298	3	b3342,b0662,b1480
	GO:0043043	peptide biosynthetic process	4.6844e-05	0.0026177	18	b3310,b2185,b4200,b3304,b2890,b3298,b3306,b0169,b3986,b3307,b3983,b3303,b3305,b3299,b3294,b2606,b3297,b3165	12	b3744,b0026,b1480,b0680,b4129,b0487,b0662,b1136,b0893,b1280,b4041,b3342
	GO:0006412	translation	4.9183e-05	0.0027026	18	b3299,b3294,b3297,b3165,b2606,b3983,b3307,b3303,b3305,b3306,b0169,b3986,b4200,b3304,b3310,b2185,b3298,b2890	11	b1280,b4041,b3342,b1136,b0662,b0893,b4129,b0680,b0026,b3744,b1480
	GO:0034654	nucleobase-containing compound biosynthetic process	6.0124e-05	0.0032497	22	b4178,b3988,b3783,b4179,b2289,b2741,b3987,b1653,b0949,b0629,b1247,b0809,b0739,b0924,b1435,b3813,b3169,b2507,b1285,b2508,b3295,b4440	60	b3178,b4479,b2617,b0487,b0999,b1303,b2409,b4340,b3418,b2592,b1422,b4401,b3602,b2615,b3931,b1237,b4043,b3226,b3066,b0755,b0113,b2709,b1570,b2667,b3357,b1642,b0438,b4212,b1594,b0416,b1059,b1827,b1341,b1162,b3237,b3487,b0882,b1130,b3405,b4293,b3928,b3501,b4361,b4324,b3210,b0080,b1129,b2217,b2105,b0002,b1275,b1323,b3067,b1477,b0208,b3010,b4396,b4383,b0240,b0069
	GO:0043603	cellular amide metabolic process	7.1353e-05	0.0037944	19	b3299,b3297,b3304,b3298,b3306,b3307,b3983,b3303,b3305,b3294,b2606,b3165,b3310,b2185,b4200,b2890,b0169,b3986,b2507	14	b0662,b0674,b1136,b0893,b1280,b0026,b0487,b4129,b4041,b3342,b0529,b3744,b1480,b0680
	GO:0019438	aromatic compound biosynthetic process	9.8e-05	0.0051287	23	b3295,b2508,b4440,b1285,b2507,b1435,b3169,b3813,b0739,b0924,b1247,b0809,b0629,b0949,b2741,b3987,b1653,b3783,b4178,b3988,b1260,b4179,b2289	68	b4396,b3010,b4383,b1477,b0208,b0069,b0240,b0586,b2217,b2020,b0080,b1129,b1344,b1275,b1323,b3067,b2019,b1270,b2105,b0002,b4293,b3405,b1130,b3501,b4361,b4324,b3210,b3928,b1341,b1162,b0882,b3487,b3237,b0438,b4212,b1642,b1594,b0416,b1059,b1827,b0113,b0755,b2709,b1570,b0529,b3226,b3066,b2667,b3357,b4401,b3602,b2615,b4340,b3418,b2592,b1422,b1237,b4043,b3931,b3805,b3178,b3774,b4479,b0999,b1303,b2409,b26…
	GO:0006518	peptide metabolic process	0.0001015	0.0051501	18	b2890,b3298,b2185,b3310,b4200,b3304,b3986,b0169,b3306,b3305,b3303,b3307,b3983,b2606,b3165,b3297,b3294,b3299	12	b1480,b0026,b3744,b0680,b0487,b4129,b0893,b0662,b1136,b3342,b4041,b1280
	GO:1901362	organic cyclic compound biosynthetic process	0.00010153	0.0051501	23	b0949,b0629,b0809,b1247,b4178,b3988,b3783,b4179,b1260,b2289,b2741,b3987,b1653,b2507,b1285,b2508,b3295,b4440,b0739,b0924,b1435,b3813,b3169	72	b3066,b3226,b0755,b0113,b0529,b2709,b1570,b2667,b0759,b3357,b1642,b0438,b4212,b0416,b1594,b1827,b1059,b3805,b3178,b4479,b3774,b0487,b2617,b1303,b2409,b0999,b3418,b2016,b4340,b2592,b1422,b4401,b2615,b3602,b3931,b1237,b4043,b0080,b2020,b1344,b1129,b2217,b2105,b1270,b0415,b0002,b1275,b3067,b2019,b1323,b1477,b4211,b0208,b4383,b4396,b3010,b0586,b0240,b0069,b1162,b1341,b3237,b3487,b0882,b1130,b3405,b42…
	GO:0065007	biological regulation	0.0001054	0.005265	30	b1285,b2566,b4440,b3702,b2508,b0742,b0924,b0911,b0739,b0948,b4375,b3169,b0470,b1435,b3168,b2278,b0949,b0629,b3165,b1247,b0809,b0184,b2289,b2422,b4178,b2672,b1653,b0457,b2741,b3097	70	b2105,b0002,b0116,b1275,b3067,b1323,b0080,b1129,b2217,b0240,b4041,b0069,b1477,b0208,b4383,b3336,b4396,b3010,b3237,b4173,b2696,b0882,b1341,b1162,b3928,b3129,b1280,b3501,b3210,b4324,b4361,b3770,b1130,b4293,b3405,b2667,b3357,b3932,b3293,b3226,b0492,b0755,b0113,b2709,b1570,b0416,b1594,b1827,b1642,b0438,b4212,b0487,b2617,b1303,b2409,b0999,b3178,b3500,b4479,b3922,b1978,b3931,b1237,b4043,b3418,b4340,b14…
	GO:0009378	four-way junction helicase activity	0.00012368	0.0060862	1	b0470	7	b2592,b3178,b0438,b3931,b0439,b0882,b4361
	GO:0019752	carboxylic acid metabolic process	0.00013012	0.0063087	12	b0736,b1263,b0221,b1260,b1262,b2903,b2508,b3787,b2388,b2890,b3829,b2507	39	b0662,b3607,b0674,b1271,b1136,b1779,b0893,b0118,b2016,b3433,b2210,b3341,b0026,b3956,b3774,b2463,b0059,b4014,b3237,b4129,b2926,b2290,b4025,b4211,b2029,b2379,b0529,b3744,b3226,b1189,b3426,b2020,b4015,b2019,b0116,b2063,b4488,b0680,b0002
	GO:0005737	cytoplasm	0.0001346	0.0064315	23	b2185,b3310,b4200,b2890,b3014,b3986,b0169,b3307,b3983,b2508,b3303,b3305,b3294,b2606,b3165,b3304,b3298,b3306,b3133,b4179,b3299,b3813,b3297	21	b3744,b1480,b2020,b2019,b4142,b0680,b1094,b3401,b4350,b3342,b4041,b0240,b3343,b0585,b4129,b0662,b3607,b1136,b1280,b3928,b3433
	GO:0018130	heterocycle biosynthetic process	0.00014693	0.0068018	23	b1285,b2507,b3295,b2508,b4440,b0739,b0924,b1435,b3169,b3813,b0949,b0809,b1247,b0629,b3783,b3988,b4178,b2289,b4179,b1260,b2741,b1653,b3987	69	b2217,b1344,b1129,b0080,b2020,b3067,b2019,b1323,b1275,b0002,b0415,b2105,b1270,b4383,b4396,b3010,b0208,b1477,b0069,b0240,b0586,b1341,b1162,b0882,b3237,b3487,b3405,b4293,b1130,b4324,b3210,b4361,b3501,b3928,b0529,b1570,b2709,b0113,b0755,b3226,b3066,b3357,b2667,b4212,b0438,b1642,b1827,b1059,b0416,b1594,b4479,b3774,b3805,b3178,b1303,b2409,b0999,b0487,b2617,b2615,b3602,b4401,b1422,b2592,b3418,b4340,b40…
	GO:0009056	catabolic process	0.00014943	0.0068018	8	b2388,b0221,b3097,b2903,b0740,b0742,b0911,b0984	19	b0425,b3928,b0480,b3210,b2029,b2016,b4209,b3602,b0662,b4025,b2154,b0881,b2926,b0867,b4539,b2696,b3932,b1189,b2143
	GO:0004529	exodeoxyribonuclease activity	0.0001506	0.0068018	3	b3097,b0949,b0981	3	b2011,b3233,b2509
	GO:0016895	exodeoxyribonuclease activity, producing 5'-phosphomonoesters	0.0001506	0.0068018	3	b0949,b0981,b3097	3	b2509,b3233,b2011
	GO:1901564	organonitrogen compound metabolic process	0.00017271	0.007695	33	b3298,b3304,b1260,b3297,b1263,b2890,b3829,b4200,b0949,b3310,b2185,b3986,b3303,b1262,b3307,b3165,b2606,b2388,b0809,b1247,b3306,b0924,b3168,b3813,b3299,b0169,b2507,b3305,b2508,b2903,b3983,b2566,b3294	43	b3805,b3774,b2290,b0487,b2463,b0893,b2592,b1779,b1136,b3607,b2615,b3942,b3433,b0529,b0680,b2063,b0867,b2154,b2143,b0026,b3341,b2926,b4129,b3237,b1982,b0674,b0662,b1280,b2020,b1344,b1480,b3744,b1270,b0002,b0415,b2019,b2029,b4211,b4025,b0586,b4041,b2379,b3342
	GO:0044267	cellular protein metabolic process	0.00018259	0.0080268	21	b3294,b1247,b2606,b3165,b3307,b3983,b3303,b3305,b0169,b3986,b3310,b2185,b4200,b0949,b2890,b0984,b3299,b3297,b3306,b3304,b3298	21	b4041,b3342,b0473,b4142,b3932,b0680,b3401,b0015,b3744,b1129,b1480,b1612,b3349,b1280,b3928,b0662,b1136,b0893,b4129,b2614,b0026
	GO:0043436	oxoacid metabolic process	0.00020143	0.0087381	12	b3787,b2388,b1262,b2903,b2508,b2507,b3829,b2890,b1263,b0221,b0736,b1260	39	b2379,b4025,b2029,b4211,b2019,b4015,b0116,b0002,b4488,b0680,b2063,b0529,b3744,b3226,b1189,b2020,b3426,b3433,b2210,b0662,b3607,b0674,b1136,b1271,b1779,b2016,b0118,b0893,b4014,b2463,b0059,b4129,b2926,b2290,b3237,b3341,b3956,b0026,b3774
	GO:0017076	purine nucleotide binding	0.00021952	0.0092874	22	b1246,b4289,b4375,b0924,b3162,b3168,b0470,b3813,b3652,b2507,b2584,b3702,b2566,b3783,b2422,b0981,b1653,b0949,b2890,b1247,b0809,b2388	45	b0026,b1162,b0882,b0059,b4129,b4173,b0879,b3210,b4361,b0488,b3744,b3780,b1129,b1323,b1270,b0660,b4383,b0473,b2675,b3486,b4041,b4575,b1978,b2614,b3178,b1702,b1303,b0439,b1114,b1136,b4143,b0893,b2592,b3340,b1612,b3942,b4171,b3931,b3179,b1413,b2709,b1570,b0680,b0438,b4350
	GO:0043168	anion binding	0.00021972	0.0092874	24	b2890,b0949,b2388,b1247,b0809,b2422,b3783,b0981,b0221,b1653,b3652,b2507,b2584,b2566,b3702,b1246,b4289,b4375,b3162,b0924,b3168,b3813,b1378,b0470	66	b2895,b3426,b3226,b1189,b1413,b1570,b2709,b0680,b0438,b2133,b4350,b1059,b3500,b3178,b1702,b0039,b1978,b2290,b0439,b1114,b1303,b4143,b4340,b0893,b2592,b1136,b0928,b2210,b1687,b3942,b4171,b3931,b3179,b3340,b1612,b3780,b1129,b0488,b3744,b1270,b4488,b0002,b0660,b0116,b1323,b2675,b4383,b0154,b1109,b2810,b0473,b4041,b4575,b2379,b3486,b1162,b0026,b4129,b3237,b4173,b0879,b0882,b0059,b0662,b3210,b4361
	GO:0035639	purine ribonucleoside triphosphate binding	0.00022681	0.0094658	22	b3652,b2507,b2584,b2566,b3702,b1246,b4289,b4375,b3162,b0924,b3168,b3813,b0470,b2890,b0949,b2388,b0809,b1247,b2422,b3783,b0981,b1653	44	b3780,b1129,b0488,b3744,b1270,b0660,b1323,b2675,b4383,b0473,b4041,b4575,b3486,b1162,b0026,b4129,b4173,b0879,b0882,b0059,b3210,b4361,b1413,b1570,b2709,b0680,b0438,b4350,b3178,b1702,b1978,b0439,b1114,b1303,b4143,b0893,b2592,b1136,b3942,b4171,b3931,b3179,b3340,b1612
	GO:0050789	regulation of biological process	0.00023384	0.0095616	27	b2422,b4178,b2289,b2741,b3097,b0457,b1653,b0949,b0184,b0809,b1247,b0629,b3165,b0948,b4375,b0911,b0739,b0924,b3168,b1435,b3169,b1285,b0742,b2508,b3702,b2566,b4440	69	b1978,b3922,b3500,b3178,b4479,b2409,b1303,b0999,b0487,b2617,b4401,b3602,b3418,b4340,b2592,b1422,b1237,b4043,b3931,b0755,b0113,b2709,b1570,b3226,b0492,b3932,b3293,b2667,b3357,b0438,b4212,b1642,b0416,b1594,b1827,b1341,b1162,b2696,b0882,b3237,b4173,b4293,b3405,b1130,b3501,b1280,b4324,b3210,b4361,b3770,b3928,b3129,b2217,b0080,b1129,b0116,b1275,b3067,b1323,b2105,b0002,b4383,b3010,b4396,b1477,b0208,b00…
	GO:0001882	nucleoside binding	0.00024361	0.0095616	22	b0949,b2890,b0809,b1247,b2388,b3783,b2422,b0981,b1653,b3652,b2507,b2584,b3702,b2566,b4375,b4289,b1246,b0924,b3162,b3168,b0470,b3813	44	b1570,b2709,b1413,b0680,b0438,b4350,b1978,b1702,b3178,b1303,b0439,b1114,b1136,b2592,b0893,b4143,b1612,b3340,b3179,b3931,b4171,b3942,b3744,b0488,b1129,b3780,b1323,b0660,b1270,b0473,b4383,b2675,b3486,b4575,b4041,b0026,b1162,b0059,b0882,b0879,b4173,b4129,b4361,b3210
	GO:0001883	purine nucleoside binding	0.00024361	0.0095616	22	b0924,b3162,b1246,b4289,b4375,b0470,b3813,b3168,b2507,b3652,b3702,b2566,b2584,b0981,b3783,b2422,b1653,b0949,b2890,b0809,b1247,b2388	44	b0882,b0059,b4129,b4173,b0879,b0026,b1162,b3210,b4361,b1323,b1270,b0660,b0488,b3744,b3780,b1129,b3486,b4575,b4041,b4383,b0473,b2675,b1303,b0439,b1114,b1978,b3178,b1702,b3340,b1612,b4171,b3942,b3931,b3179,b1136,b4143,b0893,b2592,b0680,b1413,b2709,b1570,b4350,b0438
	GO:0032549	ribonucleoside binding	0.00024361	0.0095616	22	b2422,b3783,b0981,b1653,b2890,b0949,b2388,b0809,b1247,b1246,b4289,b4375,b3162,b0924,b3168,b3813,b0470,b3652,b2507,b2584,b2566,b3702	44	b3178,b1702,b1978,b0439,b1114,b1303,b0893,b4143,b2592,b1136,b4171,b3942,b3931,b3179,b3340,b1612,b1413,b2709,b1570,b0680,b0438,b4350,b1162,b0026,b4129,b4173,b0879,b0882,b0059,b3210,b4361,b3780,b1129,b0488,b3744,b1270,b0660,b1323,b2675,b4383,b0473,b4041,b4575,b3486
	GO:0032550	purine ribonucleoside binding	0.00024361	0.0095616	22	b0949,b2890,b0809,b1247,b2388,b0981,b3783,b2422,b1653,b2507,b3652,b3702,b2566,b2584,b0924,b3162,b4375,b4289,b1246,b0470,b3813,b3168	44	b0680,b1570,b2709,b1413,b4350,b0438,b1303,b1114,b0439,b1978,b1702,b3178,b1612,b3340,b3179,b3931,b3942,b4171,b1136,b2592,b4143,b0893,b1323,b0660,b1270,b3744,b0488,b1129,b3780,b3486,b4041,b4575,b0473,b4383,b2675,b0059,b0882,b0879,b4173,b4129,b0026,b1162,b4361,b3210
	GO:0006082	organic acid metabolic process	0.00026036	0.010099	12	b1260,b1263,b0221,b0736,b2507,b3829,b2890,b3787,b2388,b1262,b2903,b2508	39	b2463,b0059,b4014,b3237,b2290,b4129,b2926,b3341,b3956,b0026,b3774,b3433,b2210,b3607,b0674,b0662,b1271,b1136,b1779,b0893,b2016,b0118,b4015,b2019,b0116,b2063,b4488,b0002,b0680,b0529,b3744,b1189,b3226,b2020,b3426,b2379,b4025,b4211,b2029
	GO:1901566	organonitrogen compound biosynthetic process	0.0003017	0.011566	26	b3298,b3304,b1260,b3306,b3813,b3297,b3299,b3829,b2890,b0949,b4200,b2185,b3310,b3986,b2507,b0169,b2508,b3303,b3305,b3983,b3307,b3165,b2606,b0809,b3294,b1247	28	b3805,b3774,b0026,b3341,b0487,b4129,b0893,b1779,b1136,b3607,b0662,b2615,b0674,b3433,b1280,b2020,b1480,b1344,b3744,b0529,b1270,b0680,b0415,b2019,b4211,b0586,b3342,b4041
	GO:0043229	intracellular organelle	0.00032893	0.012465	25	b1435,b4291,b3299,b3169,b3297,b2474,b3813,b4064,b3304,b3298,b0739,b3306,b4179,b3983,b3307,b3305,b3303,b3294,b3165,b2606,b4200,b3310,b2185,b0169,b3986	19	b0662,b0893,b2592,b0231,b1612,b3928,b1162,b3487,b0439,b0473,b4350,b1059,b3342,b0755,b1129,b1480,b3067,b3293,b1094
	GO:0032555	purine ribonucleotide binding	0.00033482	0.012544	22	b2890,b0949,b2388,b0809,b1247,b0981,b2422,b3783,b1653,b2507,b3652,b2566,b3702,b2584,b3162,b0924,b4375,b4289,b1246,b3813,b0470,b3168	44	b0680,b2709,b1570,b1413,b4350,b0438,b1114,b0439,b1303,b1702,b3178,b1978,b3179,b3931,b3942,b4171,b1612,b3340,b2592,b4143,b0893,b1136,b0660,b1270,b1323,b1129,b3780,b3744,b0488,b4575,b4041,b3486,b2675,b0473,b4383,b0879,b4173,b4129,b0059,b0882,b1162,b0026,b4361,b3210
	GO:0030554	adenyl nucleotide binding	0.00039568	0.014658	20	b3168,b1653,b3813,b0470,b2422,b4289,b1246,b3783,b3162,b0924,b2584,b2388,b2566,b3702,b1247,b0809,b3652,b2890,b0949,b2507	43	b2592,b4143,b0893,b1136,b3179,b3931,b3942,b4171,b4361,b1612,b3210,b1162,b1702,b3178,b2614,b1978,b0026,b0879,b4173,b1114,b0439,b4129,b0059,b1303,b0882,b2675,b0473,b0438,b4383,b4575,b3486,b4350,b1129,b3780,b2709,b1570,b3744,b1413,b0488,b0660,b0680,b1270,b1323
	GO:0006260	DNA replication	0.00040209	0.01473	4	b0470,b3702,b0184,b4376	13	b3931,b0417,b3928,b3863,b2675,b4259,b3602,b0438,b3357,b0060,b3066,b3399,b2709
	GO:0008134	transcription factor binding	0.00041621	0.01508	2	b1247,b0809	12	b3928,b3931,b4361,b1323,b1303,b0882,b0893,b3178,b2592,b0438,b4383,b2709
	GO:0043226	organelle	0.00043117	0.015336	26	b2185,b3310,b4200,b3986,b0169,b3307,b3983,b3305,b3303,b3294,b2606,b3165,b4064,b3304,b0739,b3298,b3306,b4179,b1435,b4291,b3097,b3299,b3169,b2474,b3813,b3297	20	b0755,b1129,b1480,b3293,b3067,b1094,b0473,b1059,b4350,b3342,b1162,b0439,b3487,b2617,b0662,b2592,b0893,b1612,b0231,b3928
	GO:0016796	exonuclease activity, active with either ribo- or deoxyribonucleic acids and producing 5'-phosphomonoesters	0.0004326	0.015336	3	b0981,b0949,b3097	3	b2509,b3233,b2011
	GO:0006974	cellular response to DNA damage stimulus	0.00051053	0.017907	6	b2422,b0984,b2565,b0470,b0809,b3295	16	b1114,b3357,b0439,b0882,b3635,b3178,b1570,b1978,b4041,b0417,b3931,b2011,b4361,b0231,b2592,b0438
	GO:0034061	DNA polymerase activity	0.00057328	0.019896	3	b4376,b0470,b3169	5	b0231,b3863,b0060,b4259,b3399
	GO:0005524	ATP binding	0.00060826	0.02089	20	b1246,b3783,b4289,b2422,b0924,b3162,b3168,b0470,b3813,b1653,b0949,b3652,b2890,b2507,b2584,b3702,b1247,b0809,b2566,b2388	42	b1978,b0026,b1702,b3178,b1162,b0059,b1303,b0882,b4129,b0879,b1114,b4173,b0439,b1136,b0893,b4143,b2592,b4361,b1612,b3210,b4171,b3942,b3179,b3931,b1413,b3744,b0488,b1570,b2709,b3780,b1129,b1323,b1270,b0680,b0660,b0438,b4383,b0473,b2675,b3486,b4350,b4575
	GO:0050794	regulation of cellular process	0.00063245	0.021497	24	b4375,b0739,b0924,b3168,b1435,b3169,b1285,b0742,b2508,b3702,b2566,b4440,b2422,b4178,b2289,b2741,b3097,b0457,b1653,b0949,b1247,b0809,b3165,b0629	66	b1341,b1162,b0882,b3237,b4173,b3405,b4293,b1130,b3501,b1280,b4361,b3770,b4324,b3210,b3928,b3129,b2217,b0080,b1129,b1275,b0116,b1323,b3067,b2105,b0002,b3010,b4396,b4383,b1477,b0208,b0069,b0240,b4041,b3922,b1978,b3178,b3500,b4479,b0999,b2409,b1303,b2617,b0487,b4401,b3602,b4340,b3418,b1422,b2592,b1237,b4043,b3931,b0113,b0755,b2709,b1570,b0492,b3226,b2667,b3357,b0438,b4212,b1642,b1594,b0416,b1827
	GO:0032553	ribonucleotide binding	0.00064361	0.021653	22	b2890,b0949,b2388,b1247,b0809,b0981,b2422,b3783,b1653,b2507,b3652,b2566,b3702,b2584,b3162,b0924,b4375,b4289,b1246,b3813,b0470,b3168	45	b0680,b2895,b2709,b1570,b1413,b4350,b0438,b1114,b0439,b1303,b1702,b3178,b1978,b3179,b3931,b3942,b4171,b1612,b3340,b2592,b4143,b0893,b1136,b0660,b1270,b1323,b1129,b3780,b3744,b0488,b4041,b4575,b3486,b2675,b0473,b4383,b0879,b4173,b4129,b0059,b0882,b1162,b0026,b4361,b3210
	GO:0032559	adenyl ribonucleotide binding	0.00065082	0.021674	20	b3168,b0470,b1653,b3813,b4289,b1246,b3783,b2422,b0924,b3162,b2584,b3702,b0809,b1247,b2388,b2566,b0949,b3652,b2890,b2507	42	b1136,b2592,b4143,b0893,b4361,b1612,b3210,b3179,b3931,b4171,b3942,b1978,b0026,b1162,b1702,b3178,b0059,b0882,b1303,b0879,b4173,b1114,b0439,b4129,b0473,b0438,b4383,b2675,b3486,b4350,b4575,b1570,b2709,b1413,b3744,b0488,b1129,b3780,b1323,b0680,b0660,b1270
	GO:0097367	carbohydrate derivative binding	0.00068618	0.022623	22	b2388,b0809,b1247,b2890,b0949,b1653,b2422,b3783,b0981,b2584,b2566,b3702,b3652,b2507,b3168,b3813,b0470,b4289,b4375,b1246,b3162,b0924	45	b0438,b4350,b2895,b2709,b1570,b1413,b0680,b2592,b0893,b4143,b1136,b3931,b3179,b4171,b3942,b1612,b3340,b3178,b1702,b1978,b0439,b1114,b1303,b2675,b0473,b4383,b4575,b4041,b3486,b1129,b3780,b0488,b3744,b0660,b1270,b1323,b3210,b4361,b1162,b0026,b4173,b0879,b4129,b0882,b0059
	GO:0005198	structural molecule activity	0.00080721	0.02635	17	b3294,b3299,b2606,b3297,b3165,b3307,b3983,b3303,b3305,b3306,b0169,b3986,b3310,b2185,b3304,b4200,b3298	7	b3928,b3342,b0662,b0893,b0439,b2614,b1480
	GO:0043167	ion binding	0.00086091	0.027828	32	b0949,b2206,b3011,b4469,b2890,b3829,b4376,b1247,b0809,b2388,b3783,b2384,b2422,b0981,b3132,b0221,b1653,b3652,b2507,b2584,b3702,b2566,b1246,b4375,b4289,b0924,b3546,b3162,b3168,b0470,b3813,b1378	85	b1413,b2709,b1570,b0015,b3426,b1741,b2895,b3226,b3066,b1189,b1656,b3635,b0680,b0438,b2509,b2520,b2106,b4350,b1059,b2133,b1978,b3894,b1702,b3178,b3500,b2096,b0039,b1303,b2290,b0487,b1114,b0439,b1136,b0928,b0893,b4340,b4143,b2592,b3340,b1612,b3942,b4171,b1687,b2210,b3179,b3931,b3744,b0488,b2020,b3780,b1129,b0116,b1323,b2019,b1270,b2105,b4488,b0002,b0660,b2810,b4383,b3336,b0154,b1109,b0473,b2675,b34…
	GO:0008855	exodeoxyribonuclease VII activity	0.00089153	0.028537	3	b0949,b0981,b3097	2	b2509,b3233
	GO:0004536	deoxyribonuclease activity	0.0010381	0.03291	4	b3097,b2903,b0949,b0981	4	b3233,b2509,b2011,b3635
	GO:0006281	DNA repair	0.0010591	0.033255	5	b0809,b0470,b2565,b2422,b0984	15	b0438,b2592,b0231,b4361,b2011,b3931,b4041,b0417,b1570,b3178,b0882,b3635,b0439,b3357,b1114
	GO:1901575	organic substance catabolic process	0.001072	0.033343	6	b0984,b0911,b0740,b2903,b0221,b2388	16	b2143,b1189,b2696,b3932,b0867,b4539,b2926,b0881,b2154,b4025,b0662,b4209,b2029,b2016,b0480,b0425
	GO:0033554	cellular response to stress	0.0013703	0.042112	6	b0984,b2422,b2565,b3295,b0470,b0809	16	b3178,b1978,b1570,b1114,b3357,b0439,b3635,b0882,b2592,b0438,b2011,b4041,b3931,b0417,b0231,b4361
	GO:0032991	macromolecular complex	0.0013795	0.042112	21	b3299,b0470,b3813,b3297,b3304,b0739,b3298,b3306,b3307,b3983,b3305,b3303,b3294,b2606,b3165,b2185,b3310,b4200,b4376,b3986,b0169	20	b0662,b0893,b3770,b1612,b1280,b3928,b1687,b1978,b1162,b0059,b0439,b3487,b0473,b1059,b4350,b3342,b1480,b3067,b3932,b0415
	GO:0003677	DNA binding	0.001506	0.045553	27	b0629,b0809,b0949,b4376,b2741,b3097,b3987,b1653,b2422,b3988,b4064,b3783,b0981,b3295,b4440,b3702,b0984,b3652,b3014,b4291,b1435,b0470,b3169,b0948,b4201,b3162,b0924	58	b1642,b0438,b1594,b4350,b3863,b1059,b1827,b3066,b3226,b0113,b1413,b1570,b2709,b2667,b3357,b3932,b3635,b4340,b3418,b2622,b4401,b3602,b0014,b3931,b3021,b0231,b1237,b4043,b0487,b0060,b1114,b1303,b1477,b4396,b3010,b4383,b2516,b0586,b0069,b3780,b0080,b2217,b1270,b2105,b3067,b1130,b4259,b0966,b3405,b4293,b3928,b3129,b4361,b4324,b1162,b0956,b0059,b0882
	GO:0006950	response to stress	0.0024216	0.071597	7	b3295,b2903,b0809,b0470,b2565,b2422,b0984	22	b0438,b0473,b2592,b0231,b4361,b2011,b3942,b4041,b0417,b3931,b1978,b1570,b3178,b3495,b3923,b0882,b3635,b3293,b3357,b1114,b0439,b1067
	GO:0001071	nucleic acid binding transcription factor activity	0.0024322	0.071597	7	b1653,b3169,b2741,b2289,b4178,b4440,b0629	31	b3129,b3928,b4043,b4324,b3501,b1422,b4340,b3418,b3602,b4293,b2617,b3237,b0999,b2409,b4479,b1827,b1594,b0208,b1642,b4212,b3010,b4396,b3357,b2667,b3067,b1275,b1129,b3226,b0080,b2217,b0113
	GO:0003700	transcription factor activity, sequence-specific DNA binding	0.0024322	0.071597	7	b2741,b1653,b3169,b4178,b2289,b0629,b4440	31	b4340,b3418,b1422,b4293,b3602,b3129,b3928,b3501,b4043,b4324,b4479,b3237,b2617,b0999,b2409,b1642,b0208,b3010,b4396,b4212,b1594,b1827,b0080,b1129,b3226,b0113,b2217,b2667,b3357,b1275,b3067
	GO:0008652	cellular amino acid biosynthetic process	0.0028513	0.083191	4	b2508,b3829,b1260,b2507	11	b3744,b3607,b0674,b0529,b3341,b2020,b4211,b3774,b1779,b2019,b3433
	GO:0006457	protein folding	0.0031557	0.091265	0		6	b3401,b3928,b4142,b3349,b2614,b0473
	GO:0004518	nuclease activity	0.0034568	0.098902	6	b0184,b3097,b2903,b0981,b4376,b0949	10	b3863,b4350,b2011,b2509,b0611,b4539,b3635,b0060,b3233,b3399
	GO:0042802	identical protein binding	0.0034797	0.098902	0		5	b0893,b3418,b3928,b0492,b2614
	GO:0003674	molecular_function	0.0035511	0.10007	113	b0737,b3651,b3295,b2566,b3787,b0169,b3013,b3813,b3102,b0739,b0924,b2386,b1247,b4290,b4469,b2890,b2185,b4200,b0949,b3135,b1653,b3132,b3987,b4178,b4064,b3304,b3133,b0981,b2584,b0742,b2385,b4440,b3652,b1623,b0984,b4291,b1435,b2587,b1246,b3307,b0740,b1262,b2388,b0224,b2206,b4376,b0736,b0221,b0459,b0847,b3783,b2903,b4323,b3305,b2508,b3294,b3702,b2507,b3014,b3168,b3299,b3169,b0470,b4375,b0948,b3306,b31…	221	b0208,b2029,b2516,b4383,b4025,b4396,b4041,b3342,b2379,b2416,b0058,b1480,b3744,b0002,b0660,b3067,b2777,b4065,b0611,b4293,b0243,b3501,b0659,b3341,b2143,b4173,b1982,b1635,b1642,b0872,b2509,b4212,b2133,b0015,b2063,b0759,b3032,b2592,b3187,b2615,b3602,b1920,b3433,b0425,b2011,b4171,b4479,b3774,b1702,b1912,b4175,b0060,b2290,b0487,b2463,b1477,b0473,b4575,b2572,b0069,b3780,b3233,b0488,b2105,b0966,b4259,b11…
	GO:0006396	RNA processing	0.0037429	0.10458	10	b2422,b3167,b2608,b0949,b0948,b4180,b2581,b3166,b3651,b0470	18	b1189,b3500,b3426,b3343,b0659,b0439,b3499,b0882,b3067,b0116,b2592,b0662,b0438,b3931,b3928,b3179,b4171,b1059
	GO:0044444	cytoplasmic part	0.003817	0.10575	19	b3303,b3305,b3983,b3307,b3165,b3813,b3297,b2606,b3299,b3294,b3298,b3304,b4200,b2185,b3310,b4179,b3986,b0169,b3306	7	b0662,b3928,b3342,b1280,b4350,b1480,b1094
	GO:0003678	DNA helicase activity	0.0038838	0.10671	1	b0470	8	b4361,b0882,b0439,b3931,b4171,b0438,b2592,b3178
	GO:0006520	cellular amino acid metabolic process	0.0042214	0.11502	8	b2507,b1260,b3829,b2890,b1263,b2903,b2508,b1262	22	b2063,b0002,b0680,b3237,b4129,b2290,b2463,b2019,b3774,b2020,b3341,b0529,b3744,b0026,b2379,b3433,b1779,b4211,b0893,b3607,b0674,b1136
	GO:0034655	nucleobase-containing compound catabolic process	0.0043815	0.11841	1	b0911	4	b4539,b2696,b2143,b0480
	GO:0004175	endopeptidase activity	0.0048623	0.13033	5	b4064,b2587,b0984,b1845,b0740	11	b3932,b0439,b0488,b3498,b3178,b0659,b3226,b4324,b4043,b1829,b1642
	GO:0044877	macromolecular complex binding	0.0051081	0.13582	3	b3702,b2185,b0949	5	b3067,b4173,b3931,b1162,b3418
	GO:0003774	motor activity	0.0052663	0.1368	3	b3702,b3165,b3097	2	b1612,b3487
	GO:0006576	cellular biogenic amine metabolic process	0.0052696	0.1368	5	b1260,b2566,b3168,b1262,b0949	2	b2592,b3942
	GO:0044106	cellular amine metabolic process	0.0052696	0.1368	5	b1260,b2566,b1262,b0949,b3168	2	b3942,b2592
	GO:0007264	small GTPase mediated signal transduction	0.0053456	0.13769	5	b2422,b2566,b0949,b3168,b4375	2	b2592,b4173
	GO:0044248	cellular catabolic process	0.0054547	0.13941	6	b3097,b0911,b2903,b0984,b0742,b0221	9	b3602,b2143,b2154,b0480,b3928,b3210,b4539,b3932,b2696
	GO:1901605	alpha-amino acid metabolic process	0.0055677	0.14064	7	b2507,b1260,b3829,b1263,b1262,b2903,b2508	11	b2019,b2063,b3237,b0529,b3341,b3744,b2020,b0674,b3607,b1779,b4211
	GO:0016788	hydrolase activity, acting on ester bonds	0.0055882	0.14064	12	b0736,b3097,b0981,b3546,b4178,b2422,b0809,b3165,b0184,b2903,b4376,b0949	20	b4361,b3931,b2011,b0611,b0585,b0060,b0026,b3399,b3863,b4350,b4575,b0586,b2509,b2154,b4539,b3635,b2829,b4232,b3233,b1413
	GO:0019843	rRNA binding	0.0059312	0.14769	4	b4200,b3296,b2185,b3305	0
	GO:0003887	DNA-directed DNA polymerase activity	0.0059577	0.14769	2	b4376,b0470	4	b0060,b4259,b3399,b3863
	GO:0034660	ncRNA metabolic process	0.0062489	0.15375	7	b0470,b2890,b2422,b3167,b2608,b0949,b0948	21	b2592,b0893,b0662,b1136,b0438,b3931,b4171,b1059,b1189,b3500,b3426,b0659,b3343,b3744,b0026,b0439,b0680,b3499,b4129,b0882,b0116
	GO:0005623	cell	0.0063614	0.15382	35	b3304,b4064,b3298,b4179,b3133,b3097,b3297,b4200,b2185,b3310,b2890,b4376,b3986,b0740,b3307,b3303,b3165,b2606,b0739,b3306,b0924,b1435,b4291,b3299,b3169,b0470,b3813,b2474,b3014,b0169,b3983,b2508,b3305,b3296,b3294	48	b1978,b3343,b2617,b0439,b1136,b3607,b0893,b2592,b1237,b0231,b1612,b1687,b3433,b0755,b0113,b3932,b3635,b3293,b1094,b3401,b0680,b4350,b1059,b1162,b0059,b0585,b3487,b4129,b0662,b1280,b3770,b3928,b3744,b2020,b1129,b1480,b4142,b3067,b2019,b0415,b0814,b0473,b2572,b1829,b0240,b3342,b1379,b4041
	GO:0044464	cell part	0.0063614	0.15382	35	b4291,b1435,b2474,b3813,b3299,b3169,b0470,b0739,b0924,b3306,b3305,b2508,b3983,b3294,b3296,b0169,b3014,b3097,b3297,b3298,b4064,b3304,b3133,b4179,b3303,b3307,b0740,b2606,b3165,b2890,b3310,b2185,b4200,b3986,b4376	48	b0662,b3928,b3770,b1280,b1162,b4129,b3487,b0585,b0059,b0473,b0814,b1379,b4041,b3342,b0240,b1829,b2572,b1480,b1129,b2020,b3744,b0415,b2019,b3067,b4142,b2592,b0893,b3607,b1136,b3433,b1687,b1612,b0231,b1237,b3343,b1978,b0439,b2617,b1059,b4350,b0755,b0113,b0680,b3401,b1094,b3635,b3293,b3932
	GO:0046983	protein dimerization activity	0.0063915	0.15382	1	b3295	7	b0893,b0438,b2614,b1094,b0586,b3928,b3433
	GO:0044270	cellular nitrogen compound catabolic process	0.0066393	0.15748	1	b0911	5	b0480,b4539,b2696,b2154,b2143
	GO:0046700	heterocycle catabolic process	0.0066393	0.15748	1	b0911	5	b2143,b2696,b2154,b4539,b0480
	GO:0016787	hydrolase activity	0.0066909	0.15757	37	b4376,b2278,b0949,b0096,b0809,b1247,b3165,b0740,b0184,b0981,b4064,b4178,b2422,b2384,b1263,b3135,b1653,b0736,b3097,b2507,b3652,b0984,b3702,b2385,b2566,b1845,b2903,b0924,b3162,b3546,b4289,b2587,b1246,b0470,b3813,b3013,b1435	58	b3032,b0867,b3635,b3932,b2829,b2063,b2709,b1413,b3226,b3863,b4350,b0239,b2509,b2154,b0438,b1642,b1303,b1114,b0439,b0060,b3498,b3178,b1612,b4043,b3931,b2011,b4171,b2592,b4539,b1323,b1270,b3233,b4232,b0488,b0237,b3780,b1829,b3486,b4575,b0480,b0586,b4209,b3397,b0882,b0059,b0585,b4173,b0879,b3487,b2143,b0026,b3399,b0932,b0659,b4324,b4361,b1280,b0611
	GO:1901607	alpha-amino acid biosynthetic process	0.0069919	0.16349	4	b2507,b1260,b3829,b2508	9	b2019,b1779,b4211,b2020,b3341,b3607,b0529,b0674,b3744
	GO:0044281	small molecule metabolic process	0.0070585	0.1638	15	b1260,b0736,b3813,b0221,b3132,b1263,b2890,b3829,b2507,b2508,b2903,b1262,b2388,b3787,b0809	46	b3774,b2143,b3956,b0026,b3341,b4129,b2926,b2290,b3237,b4014,b1982,b2463,b0059,b0118,b2016,b0893,b1779,b1136,b1271,b3607,b2615,b0662,b0674,b2210,b3433,b3426,b2020,b3226,b1189,b3744,b0529,b1270,b0002,b4488,b0415,b0680,b2063,b0116,b2019,b4015,b2029,b4211,b4025,b0586,b0480,b2379
	GO:0004386	helicase activity	0.0071047	0.1638	4	b3702,b1247,b0470,b0949	12	b4171,b3931,b3486,b4350,b4361,b2592,b0438,b0439,b0059,b0882,b3178,b1413
	GO:0048037	cofactor binding	0.0072071	0.16501	5	b1378,b0221,b2584,b4323,b3787	36	b1271,b0928,b4249,b0662,b4340,b2016,b1779,b1539,b1687,b2210,b0425,b3433,b3500,b3774,b0039,b2463,b2290,b2810,b0154,b1109,b4211,b2029,b1059,b2133,b2379,b0529,b3426,b2020,b2895,b1189,b3226,b0116,b0759,b1380,b4488,b0002
	GO:0004222	metalloendopeptidase activity	0.0074446	0.16927	2	b0984,b2587	4	b0659,b3178,b1829,b3498
	GO:0006353	DNA-templated transcription, termination	0.0080211	0.18113	3	b3783,b3169,b4179	0
	GO:0009308	amine metabolic process	0.008221	0.18438	6	b1260,b2566,b0924,b3168,b0949,b1262	2	b3942,b2592
	GO:0042803	protein homodimerization activity	0.0098123	0.21859	0		3	b2614,b0893,b3928
	GO:0006401	RNA catabolic process	0.010163	0.22489	1	b0911	2	b2696,b4539
	GO:0050662	coenzyme binding	0.010658	0.23426	4	b4323,b3787,b1378,b0221	30	b1109,b4211,b2029,b1059,b2133,b0529,b3226,b1189,b3426,b2020,b2895,b0116,b4488,b1380,b0002,b0759,b4249,b0662,b1271,b1779,b2016,b1539,b0425,b3433,b2210,b1687,b3774,b0039,b3500,b2463
	GO:0016053	organic acid biosynthetic process	0.011073	0.24018	5	b2508,b0736,b3829,b2507,b1260	11	b1779,b4211,b0674,b3607,b3433,b3774,b2020,b0529,b3341,b3744,b2019
	GO:0046394	carboxylic acid biosynthetic process	0.011073	0.24018	5	b0736,b2508,b2507,b1260,b3829	11	b3433,b3607,b0674,b1779,b4211,b2019,b3341,b0529,b3744,b3774,b2020
	GO:0070011	peptidase activity, acting on L-amino acid peptides	0.011199	0.24133	7	b1845,b0740,b2278,b4064,b2587,b2384,b0984	14	b4324,b1829,b4043,b2154,b1642,b3932,b0585,b0439,b0488,b3498,b3178,b0659,b3226,b0932
	GO:0006914	autophagy	0.011307	0.24208	2	b3097,b0742	3	b3928,b3210,b3602
	GO:0006528	asparagine metabolic process	0.01155	0.2441	1	b2507	2	b3744,b0674
	GO:0006529	asparagine biosynthetic process	0.01155	0.2441	1	b2507	2	b3744,b0674
	GO:0030054	cell junction	0.011656	0.2447	1	b3165	1	b1129
	GO:1901361	organic cyclic compound catabolic process	0.011727	0.2447	1	b0911	5	b0480,b2696,b2154,b2143,b4539
	GO:0050896	response to stimulus	0.012589	0.26105	17	b2422,b4375,b4064,b0470,b0457,b3097,b3168,b0984,b0949,b2565,b3165,b2566,b0809,b1663,b2903,b2508,b3295	35	b1114,b4173,b0439,b0487,b3487,b0882,b3178,b1978,b3922,b0417,b3931,b2011,b3942,b3210,b4361,b3770,b0231,b2592,b1130,b4401,b3405,b0660,b3357,b1067,b3293,b3635,b3923,b3495,b1129,b2217,b1570,b4041,b0586,b0473,b0438
	GO:0002949	tRNA threonylcarbamoyladenosine modification	0.012952	0.26523	3	b0949,b2422,b0470	5	b0438,b2592,b0882,b0439,b3931
	GO:0070525	tRNA threonylcarbamoyladenosine metabolic process	0.012952	0.26523	3	b2422,b0949,b0470	5	b2592,b0438,b3931,b0439,b0882
	GO:0006869	lipid transport	0.013136	0.26735	1	b2672	3	b0643,b0473,b3233
	GO:0008408	3'-5' exonuclease activity	0.013944	0.28205	2	b4376,b0184	3	b0060,b3399,b3863
	GO:0044085	cellular component biogenesis	0.014092	0.28331	8	b3014,b3167,b0948,b3170,b2608,b3165,b0221,b0742	11	b3499,b3237,b3067,b0059,b0659,b1162,b1683,b3928,b1681,b4043,b4234
	GO:0032403	protein complex binding	0.014203	0.2838	3	b0949,b3702,b2185	4	b3418,b1162,b3931,b4173
	GO:0008237	metallopeptidase activity	0.014497	0.28793	2	b2587,b0984	5	b1829,b3498,b0932,b3178,b0659
	GO:0016614	oxidoreductase activity, acting on CH-OH group of donors	0.014692	0.29007	1	b3787	18	b1189,b3774,b3426,b2020,b0529,b1380,b0759,b2463,b0116,b2029,b2016,b4211,b0662,b1109,b1136,b1271,b0425,b2210
	GO:0016616	oxidoreductase activity, acting on the CH-OH group of donors, NAD or NADP as acceptor	0.015778	0.30964	1	b3787	17	b0662,b1136,b1109,b1271,b2029,b2016,b4211,b0425,b0529,b1189,b3774,b2020,b3426,b2463,b0116,b1380,b0759
	GO:0009057	macromolecule catabolic process	0.016968	0.33102	3	b0740,b0984,b0911	6	b4209,b3932,b2696,b4539,b0867,b0881
	GO:0051082	unfolded protein binding	0.017333	0.33615	0		5	b3602,b0015,b0473,b3401,b3928
	GO:0008289	lipid binding	0.019283	0.37179	1	b2672	3	b0643,b0473,b3233
	GO:0004616	phosphogluconate dehydrogenase (decarboxylating) activity	0.019924	0.38071	1	b3787	6	b2016,b2029,b0425,b1189,b1380,b0662
	GO:0010876	lipid localization	0.020079	0.38071	1	b2672	3	b0643,b0473,b3233
	GO:0004161	dimethylallyltranstransferase activity	0.020092	0.38071	0		2	b0882,b4171
	GO:0009067	aspartate family amino acid biosynthetic process	0.020612	0.38833	2	b3829,b2507	4	b1779,b4211,b0674,b3744
	GO:0034470	ncRNA processing	0.021274	0.39853	6	b3167,b2422,b0948,b0949,b2608,b0470	15	b3499,b0439,b0116,b0882,b3343,b3426,b0659,b3500,b1189,b4171,b3931,b1059,b2592,b0438,b0662
	GO:0008233	peptidase activity	0.022484	0.41881	8	b2384,b0984,b2587,b4064,b2278,b0740,b1845,b1435	14	b0932,b3226,b0659,b3178,b3498,b0488,b0439,b0585,b3932,b1642,b2154,b4043,b1829,b4324
	GO:0016779	nucleotidyltransferase activity	0.022788	0.42209	7	b3169,b0470,b3987,b3295,b4376,b2507,b3988	10	b3863,b0231,b3179,b2042,b1642,b4259,b0060,b0529,b3399,b3066
	GO:0003724	RNA helicase activity	0.023639	0.4354	3	b3702,b1247,b0949	7	b0439,b3931,b3486,b4361,b0882,b2592,b0438
	GO:0006508	proteolysis	0.024817	0.45457	7	b1845,b1435,b0740,b2278,b2587,b0984,b2384	12	b4324,b4043,b1829,b2154,b1642,b3932,b0585,b0439,b0488,b3498,b3178,b3226
	GO:0008270	zinc ion binding	0.026545	0.48354	4	b3132,b1653,b3829,b2384	11	b1829,b3635,b0026,b0438,b2143,b0932,b3066,b2020,b2096,b3178,b1741
	GO:0016310	phosphorylation	0.026835	0.48612	3	b2388,b3165,b2383	8	b1129,b1702,b4232,b4025,b2416,b2829,b2926,b1612
	GO:0046434	organophosphate catabolic process	0.027757	0.50008	0		6	b0662,b2016,b2029,b0425,b0480,b1189
	GO:0051287	NAD binding	0.028151	0.50443	1	b3787	14	b1380,b3433,b0425,b0759,b2463,b1189,b3774,b1779,b2029,b2016,b2020,b4211,b0662,b0529
	GO:0009896	positive regulation of catabolic process	0.029146	0.5137	2	b0742,b3097	1	b3928
	GO:0010508	positive regulation of autophagy	0.029146	0.5137	2	b3097,b0742	1	b3928
	GO:0031331	positive regulation of cellular catabolic process	0.029146	0.5137	2	b3097,b0742	1	b3928
	GO:0009451	RNA modification	0.029476	0.5137	5	b0470,b2422,b0948,b0949,b3166	9	b3931,b0439,b3499,b0058,b0059,b0882,b2592,b3343,b0438
	GO:0000775	chromosome, centromeric region	0.029604	0.5137	0		4	b0439,b1162,b3928,b3067
	GO:0098687	chromosomal region	0.029604	0.5137	0		4	b3067,b1162,b3928,b0439
	GO:0006568	tryptophan metabolic process	0.030333	0.51818	2	b1262,b1260	0
	GO:0006586	indolalkylamine metabolic process	0.030333	0.51818	2	b1262,b1260	0
	GO:0042430	indole-containing compound metabolic process	0.030333	0.51818	2	b1260,b1262	0
	GO:0005882	intermediate filament	0.030676	0.51867	0		2	b3928,b0893
	GO:0045111	intermediate filament cytoskeleton	0.030676	0.51867	0		2	b3928,b0893
	GO:0044283	small molecule biosynthetic process	0.030928	0.52025	6	b1260,b2507,b3829,b0809,b0736,b2508	13	b2019,b1270,b0415,b3744,b0529,b3341,b2020,b3774,b3433,b0674,b3607,b4211,b1779
	GO:0042493	response to drug	0.031285	0.52359	2	b4064,b1663	1	b0660
	GO:0006399	tRNA metabolic process	0.03321	0.55299	4	b2890,b2422,b0949,b0470	19	b0439,b0680,b4129,b0882,b0116,b1189,b3426,b3343,b3500,b3744,b0026,b3931,b4171,b1059,b2592,b0893,b0662,b0438,b1136
	GO:1990234	transferase complex	0.034028	0.55985	2	b4376,b0470	4	b3487,b0415,b1059,b0473
	GO:0022613	ribonucleoprotein complex biogenesis	0.034279	0.55985	4	b0948,b2608,b3170,b3167	3	b0059,b0659,b3499
	GO:0042254	ribosome biogenesis	0.034279	0.55985	4	b2608,b3170,b0948,b3167	3	b0059,b0659,b3499
	GO:0004252	serine-type endopeptidase activity	0.034301	0.55985	2	b1845,b0740	5	b3226,b0439,b1642,b4324,b4043
	GO:0005515	protein binding	0.034573	0.56131	8	b3102,b0809,b1247,b3702,b3295,b0742,b0949,b2185	33	b1280,b4361,b3931,b3433,b3928,b3129,b4293,b1920,b3602,b3418,b0893,b2592,b1303,b0882,b4173,b1978,b2614,b3178,b1162,b0586,b4383,b0438,b0473,b1635,b1323,b3401,b1094,b2829,b1413,b0015,b3233,b2709,b0492
	GO:0016740	transferase activity	0.034886	0.56131	31	b3829,b0949,b4376,b2386,b2388,b0224,b3165,b0809,b1247,b2383,b3988,b4180,b3133,b4179,b3132,b0459,b3987,b1263,b2507,b4323,b2508,b2584,b3651,b3295,b2385,b3702,b0948,b2581,b2474,b3169,b0470	46	b3066,b0529,b1413,b2829,b3499,b3923,b3932,b1642,b3863,b1702,b3178,b3805,b1912,b0643,b0487,b0060,b2463,b2592,b4340,b3187,b3607,b2615,b2042,b0014,b3179,b3931,b4171,b1612,b0231,b1129,b0002,b1270,b2019,b0154,b2416,b4041,b0586,b3399,b3341,b2926,b4014,b0882,b2113,b4259,b0720,b3210
	GO:0008677	2-dehydropantoate 2-reductase activity	0.034901	0.56131	1	b3787	6	b0662,b1109,b1189,b0425,b3774,b2029
	GO:0019439	aromatic compound catabolic process	0.03648	0.58386	1	b0911	5	b4539,b2696,b2154,b2143,b0480
	GO:0044428	nuclear part	0.037211	0.58849	1	b0739	7	b3487,b0439,b3928,b3067,b1059,b2592,b0473
	GO:0006072	glycerol-3-phosphate metabolic process	0.037483	0.58849	0		5	b0662,b0425,b1189,b2016,b2029
	GO:0046168	glycerol-3-phosphate catabolic process	0.037483	0.58849	0		5	b0425,b1189,b2029,b2016,b0662
	GO:0052646	alditol phosphate metabolic process	0.037483	0.58849	0		5	b2029,b2016,b0425,b1189,b0662
	GO:0044265	cellular macromolecule catabolic process	0.038639	0.60376	2	b0911,b0984	3	b4539,b3932,b2696
	GO:0040007	growth	0.039195	0.60669	1	b0184	1	b3129
	GO:0040008	regulation of growth	0.039195	0.60669	1	b0184	1	b3129
	GO:1901136	carbohydrate derivative catabolic process	0.039499	0.60854	0		7	b2143,b0662,b0867,b2016,b2029,b1189,b0425
	GO:0016071	mRNA metabolic process	0.040337	0.61856	1	b0911	4	b3179,b3928,b3067,b2696
	GO:0005634	nucleus	0.040726	0.62163	5	b0739,b3169,b2474,b1435,b4291	11	b3293,b3067,b3487,b0439,b0755,b1129,b0231,b1059,b3928,b0473,b2592
	GO:0006109	regulation of carbohydrate metabolic process	0.042604	0.6473	1	b0911	1	b2696
	GO:0010506	regulation of autophagy	0.044222	0.66881	2	b3097,b0742	1	b3928
	GO:0000988	transcription factor activity, protein binding	0.046178	0.69521	3	b0739,b2741,b0924	7	b2217,b4293,b3418,b4043,b2572,b3067,b3357
	GO:0016818	hydrolase activity, acting on acid anhydrides, in phosphorus-containing anhydrides	0.046765	0.69973	15	b2566,b3165,b3702,b0809,b1247,b0949,b3813,b1653,b0470,b3097,b0981,b0924,b2422,b1246,b4289	20	b3486,b4350,b0438,b1323,b1413,b0488,b2709,b4171,b3931,b4361,b1612,b2592,b3487,b0879,b4173,b0439,b0059,b1303,b0882,b3178
	GO:0016772	transferase activity, transferring phosphorus-containing groups	0.046903	0.69973	17	b0949,b4376,b2507,b3295,b4323,b2386,b3702,b1247,b0809,b2383,b2388,b3165,b3988,b3133,b3169,b0470,b3987	25	b0529,b1129,b3066,b2829,b1642,b3863,b2416,b1912,b3399,b1702,b3178,b0643,b2926,b0060,b2615,b2042,b2592,b4259,b3210,b1612,b0231,b3179,b0014,b3931,b4171
	GO:0017111	nucleoside-triphosphatase activity	0.048096	0.71428	14	b0924,b0981,b2422,b1246,b4289,b3813,b0470,b3097,b0949,b3165,b2566,b1247,b0809,b3702	20	b3487,b0439,b4173,b0879,b1303,b0882,b0059,b3178,b4171,b3931,b1612,b4361,b2592,b1323,b0488,b1413,b2709,b4350,b3486,b0438
	GO:0061695	transferase complex, transferring phosphorus-containing groups	0.049069	0.72547	2	b0470,b4376	2	b1059,b3487
	GO:0003994	aconitate hydratase activity	0.049346	0.72631	0		2	b0118,b0059
	GO:0016817	hydrolase activity, acting on acid anhydrides	0.049598	0.72678	16	b0949,b0809,b1247,b3702,b3165,b2566,b4289,b1246,b2422,b0924,b0981,b3162,b3097,b0470,b1653,b3813	20	b2709,b0488,b1413,b1323,b0438,b4350,b3486,b3178,b1303,b0882,b0059,b4173,b0439,b0879,b3487,b2592,b1612,b4361,b3931,b4171
	GO:0007049	cell cycle	0.050189	0.73218	2	b0742,b3014	6	b1978,b3602,b1162,b4043,b0439,b3928
	GO:0019239	deaminase activity	0.053651	0.7645	1	b1623	1	b2143
	GO:0000281	mitotic cytokinesis	0.05422	0.7645	1	b3014	2	b4043,b3928
	GO:0000917	barrier septum assembly	0.05422	0.7645	1	b3014	2	b3928,b4043
	GO:0032506	cytokinetic process	0.05422	0.7645	1	b3014	2	b4043,b3928
	GO:0061640	cytoskeleton-dependent cytokinesis	0.05422	0.7645	1	b3014	2	b4043,b3928
	GO:0090529	cell septum assembly	0.05422	0.7645	1	b3014	2	b3928,b4043
	GO:1902410	mitotic cytokinetic process	0.05422	0.7645	1	b3014	2	b4043,b3928
	GO:0016799	hydrolase activity, hydrolyzing N-glycosyl compounds	0.054259	0.7645	0		2	b3635,b1280
	GO:0009066	aspartate family amino acid metabolic process	0.055067	0.77258	2	b2507,b3829	4	b4211,b1779,b3744,b0674
	GO:0016462	pyrophosphatase activity	0.055554	0.77611	14	b0924,b0981,b4289,b1246,b2422,b0470,b3813,b3097,b0949,b3702,b1247,b0809,b2566,b3165	20	b0059,b1303,b0882,b0879,b4173,b0439,b3487,b3178,b4361,b1612,b3931,b4171,b2592,b1323,b2709,b1413,b0488,b3486,b4350,b0438
	GO:0045502	dynein binding	0.058383	0.81219	0		2	b3928,b0893
	GO:0006400	tRNA modification	0.058645	0.8124	3	b0949,b2422,b0470	6	b0438,b2592,b3343,b0882,b3931,b0439
	GO:0071840	cellular component organization or biogenesis	0.058977	0.81359	16	b3165,b0742,b3014,b0949,b3167,b0470,b3169,b0221,b0981,b0924,b4179,b0948,b4064,b2608,b3170,b2422	17	b1681,b3067,b3499,b4361,b4043,b0014,b3928,b3129,b3931,b4234,b2592,b0059,b3237,b0439,b1683,b0659,b1162
	GO:0003824	catalytic activity	0.059884	0.82166	71	b2903,b4323,b2508,b3651,b3295,b2566,b3702,b3787,b2507,b3013,b3813,b0470,b3169,b0948,b0924,b2386,b3165,b1247,b2890,b4469,b3829,b3011,b0949,b2278,b3097,b3132,b1653,b3135,b3987,b4178,b3988,b2384,b2422,b4064,b3133,b0981,b3990,b2584,b1845,b2385,b3652,b0984,b1623,b1435,b3166,b1378,b2474,b2587,b4289,b1246,b3546,b3162,b2581,b0740,b1262,b0184,b0224,b2388,b0809,b2383,b0096,b2206,b4376,b2585,b0736,b0459,b02…	155	b4211,b2675,b2029,b4209,b4025,b4383,b0154,b2416,b2379,b4041,b0586,b0058,b1829,b1344,b2020,b3744,b0002,b0660,b1270,b4539,b2019,b2777,b0611,b0674,b0243,b4361,b3210,b1280,b0688,b0932,b0659,b3341,b2143,b4173,b2926,b4129,b1982,b0585,b1642,b2509,b0872,b0438,b0873,b2154,b0239,b2133,b1059,b2520,b1189,b2063,b0759,b3032,b3923,b1656,b1779,b2592,b2732,b4340,b3187,b0118,b2615,b0425,b3433,b3942,b4171,b1687,b20…
	GO:0006402	mRNA catabolic process	0.060061	0.82166	1	b0911	1	b2696
	GO:0031329	regulation of cellular catabolic process	0.060418	0.82314	2	b0742,b3097	1	b3928
	GO:0032787	monocarboxylic acid metabolic process	0.062365	0.84617	4	b2388,b0221,b3787,b0736	12	b2926,b4488,b0116,b4014,b3426,b3226,b1189,b2016,b2029,b1271,b4025,b0662
	GO:0044427	chromosomal part	0.063253	0.8547	0		4	b0439,b3928,b1162,b3067
	GO:0004674	protein serine/threonine kinase activity	0.063947	0.85712	1	b3702	1	b1612
	GO:0016765	transferase activity, transferring alkyl or aryl (other than methyl) groups	0.063953	0.85712	1	b2508	5	b0882,b4171,b1270,b3805,b3187
	GO:0005681	spliceosomal complex	0.064245	0.85756	0		2	b3067,b3928
	GO:0006099	tricarboxylic acid cycle	0.066037	0.86885	0		4	b0118,b2210,b0059,b3956
	GO:0006101	citrate metabolic process	0.066037	0.86885	0		4	b2210,b0118,b0059,b3956
	GO:0072350	tricarboxylic acid metabolic process	0.066037	0.86885	0		4	b0118,b2210,b3956,b0059
	GO:0004066	asparagine synthase (glutamine-hydrolyzing) activity	0.066146	0.86885	1	b2507	1	b0674
	GO:0006468	protein phosphorylation	0.066966	0.87614	1	b3165	2	b1129,b1612
	GO:0000723	telomere maintenance	0.069687	0.88607	1	b0470	1	b4361
	GO:0032200	telomere organization	0.069687	0.88607	1	b0470	1	b4361
	GO:0060249	anatomical structure homeostasis	0.069687	0.88607	1	b0470	1	b4361
	GO:0003684	damaged DNA binding	0.071172	0.88607	1	b0984	2	b0231,b3635
	GO:0019954	asexual reproduction	0.07163	0.88607	1	b3014	2	b3928,b0488
	GO:0000910	cytokinesis	0.071798	0.88607	1	b3014	2	b3928,b4043
	GO:0031325	positive regulation of cellular metabolic process	0.073799	0.88607	2	b3097,b0742	2	b0240,b3928
	GO:0000278	mitotic cell cycle	0.073902	0.88607	1	b3014	3	b1162,b3928,b4043
	GO:1903047	mitotic cell cycle process	0.073902	0.88607	1	b3014	3	b1162,b3928,b4043
	GO:0008236	serine-type peptidase activity	0.074295	0.88607	3	b0740,b1845,b2278	7	b3226,b1642,b2154,b0439,b0585,b4043,b4324
	GO:0017171	serine hydrolase activity	0.074295	0.88607	3	b2278,b0740,b1845	7	b0439,b0585,b4043,b4324,b3226,b1642,b2154
	GO:0050660	flavin adenine dinucleotide binding	0.076957	0.88607	1	b0221	11	b2210,b1687,b2133,b0116,b1059,b3500,b3426,b1189,b0039,b1109,b0662
	GO:0006418	tRNA aminoacylation for protein translation	0.078578	0.88607	1	b2890	6	b0893,b4129,b0680,b0026,b3744,b1136
	GO:0009894	regulation of catabolic process	0.078935	0.88607	2	b3097,b0742	1	b3928
	GO:0051716	cellular response to stimulus	0.079407	0.88607	12	b4375,b2422,b3168,b0457,b0470,b2565,b0949,b0984,b3295,b0809,b2566,b3165	25	b3922,b1978,b3178,b0882,b4173,b1114,b0439,b4401,b3405,b1130,b2592,b0231,b4361,b3770,b3210,b2011,b0417,b3931,b1570,b2217,b1129,b3635,b3357,b0438,b4041
	GO:0006796	phosphate-containing compound metabolic process	0.081097	0.88607	8	b3165,b3813,b2388,b2383,b1247,b2507,b0096,b0949	18	b0425,b2416,b0480,b1612,b2029,b2016,b4025,b2154,b2615,b0662,b2926,b2829,b1702,b1129,b1189,b1344,b1912,b4232
	GO:0006366	transcription from RNA polymerase II promoter	0.081378	0.88607	1	b0739	2	b1059,b3487
	GO:0032505	reproduction of a single-celled organism	0.082713	0.88607	1	b3014	1	b3928
	GO:0043093	FtsZ-dependent cytokinesis	0.082713	0.88607	1	b3014	1	b3928
	GO:0042221	response to chemical	0.083957	0.88607	4	b3165,b1663,b3097,b4064	5	b0660,b3487,b0487,b0586,b3293
	GO:0043412	macromolecule modification	0.085446	0.88607	7	b0948,b0949,b2422,b0470,b3165,b3166,b2903	14	b3932,b0059,b0882,b3499,b0439,b0015,b3343,b1129,b4350,b1612,b0058,b3931,b0438,b2592
	GO:0003854	3-beta-hydroxy-delta5-steroid dehydrogenase activity	0.085639	0.88607	0		3	b2016,b4211,b0759
	GO:0016229	steroid dehydrogenase activity	0.085639	0.88607	0		3	b0759,b4211,b2016
	GO:0033764	steroid dehydrogenase activity, acting on the CH-OH group of donors, NAD or NADP as acceptor	0.085639	0.88607	0		3	b4211,b0759,b2016
	GO:0098519	nucleotide phosphatase activity, acting on free nucleotides	0.085839	0.88607	3	b0949,b0809,b2422	3	b1413,b4361,b3931
	GO:0000272	polysaccharide catabolic process	0.08717	0.88607	1	b0740	1	b4209
	GO:0009060	aerobic respiration	0.088881	0.88607	0		4	b0059,b3956,b2210,b0118
	GO:0000105	histidine biosynthetic process	0.089599	0.88607	2	b2508,b1260	2	b2020,b2019
	GO:0006547	histidine metabolic process	0.089599	0.88607	2	b1260,b2508	2	b2020,b2019
	GO:0052803	imidazole-containing compound metabolic process	0.089599	0.88607	2	b1260,b2508	2	b2019,b2020
	GO:0034508	centromere complex assembly	0.091245	0.88607	1	b0221	1	b3928
	GO:0009069	serine family amino acid metabolic process	0.091978	0.88607	1	b2903	1	b3607
	GO:0016615	malate dehydrogenase activity	0.092391	0.88607	0		2	b2210,b2463
	GO:0022607	cellular component assembly	0.09316	0.88607	4	b0742,b3014,b3165,b0221	8	b1683,b4234,b1162,b1681,b3067,b4043,b3237,b3928
	GO:0000776	kinetochore	0.093179	0.88607	0		3	b0439,b3928,b1162
	GO:0008150	biological_process	0.094334	0.88607	108	b0742,b4440,b3652,b0984,b1435,b4291,b2587,b1246,b0740,b3307,b1262,b2388,b2206,b4376,b0736,b2424,b0221,b2608,b3783,b0847,b0737,b3651,b3295,b3787,b2566,b0169,b3013,b3813,b0739,b0924,b2386,b1247,b2185,b0949,b4200,b2890,b3132,b1653,b3987,b4064,b3304,b4178,b2423,b0981,b3133,b1845,b3983,b4159,b3166,b1378,b4289,b0911,b1244,b2581,b1634,b3546,b0184,b3303,b0809,b0845,b2383,b2606,b0629,b0096,b1263,b3297,b26…	212	b0473,b1477,b0069,b4575,b0240,b3233,b0488,b0415,b2105,b0662,b1130,b4259,b3770,b2579,b0026,b1162,b3399,b0059,b4014,b3487,b3237,b0416,b0529,b0113,b1413,b3066,b3426,b3932,b2829,b0680,b2667,b3401,b3499,b0928,b4249,b3607,b2552,b1136,b2016,b1612,b0014,b2210,b2614,b3956,b3498,b1978,b1683,b3500,b3805,b3919,b4025,b4396,b4383,b0208,b2029,b2379,b3342,b2416,b4041,b0058,b3744,b1480,b3067,b0660,b0002,b0243,b42…
	GO:0006631	fatty acid metabolic process	0.096621	0.88607	3	b3787,b0221,b0736	8	b0116,b1271,b0662,b3426,b2029,b2016,b1189,b3226
	GO:0072524	pyridine-containing compound metabolic process	0.097736	0.88607	2	b2507,b2388	4	b2926,b2029,b4025,b2615
	GO:0019362	pyridine nucleotide metabolic process	0.098287	0.88607	1	b2388	4	b2029,b2926,b2615,b4025
	GO:0046496	nicotinamide nucleotide metabolic process	0.098287	0.88607	1	b2388	4	b4025,b2615,b2029,b2926
	GO:0016884	carbon-nitrogen ligase activity, with glutamine as amido-N-donor	0.098729	0.88607	1	b2507	1	b0674
	GO:0009360	DNA polymerase III complex	0.099556	0.88607	2	b4376,b0470	0
	GO:0042575	DNA polymerase complex	0.099556	0.88607	2	b4376,b0470	0
	GO:0004713	protein tyrosine kinase activity	0.10094	0.88607	1	b3165	0
	GO:0005912	adherens junction	0.10094	0.88607	1	b3165	0
	GO:0005924	cell-substrate adherens junction	0.10094	0.88607	1	b3165	0
	GO:0005925	focal adhesion	0.10094	0.88607	1	b3165	0
	GO:0007172	signal complex assembly	0.10094	0.88607	1	b3165	0
	GO:0030055	cell-substrate junction	0.10094	0.88607	1	b3165	0
	GO:0070161	anchoring junction	0.10094	0.88607	1	b3165	0
	GO:0008097	5S rRNA binding	0.10094	0.88607	1	b2185	0
	GO:0051015	actin filament binding	0.10094	0.88607	1	b2185	0
	GO:0002097	tRNA wobble base modification	0.10094	0.88607	0		1	b3343
	GO:0002098	tRNA wobble uridine modification	0.10094	0.88607	0		1	b3343
	GO:0002143	tRNA wobble position uridine thiolation	0.10094	0.88607	0		1	b3343
	GO:0034227	tRNA thio-modification	0.10094	0.88607	0		1	b3343
	GO:0001558	regulation of cell growth	0.10094	0.88607	0		1	b3129
	GO:0016049	cell growth	0.10094	0.88607	0		1	b3129
	GO:0097351	toxin-antitoxin pair type II binding	0.10094	0.88607	0		1	b3129
	GO:0000302	response to reactive oxygen species	0.10094	0.88607	0		1	b3293
	GO:1901031	regulation of response to reactive oxygen species	0.10094	0.88607	0		1	b3293
	GO:1901700	response to oxygen-containing compound	0.10094	0.88607	0		1	b3293
	GO:1902882	regulation of response to oxidative stress	0.10094	0.88607	0		1	b3293
	GO:0016756	glutathione gamma-glutamylcysteinyltransferase activity	0.10094	0.88607	0		1	b0487
	GO:0046937	phytochelatin metabolic process	0.10094	0.88607	0		1	b0487
	GO:0046938	phytochelatin biosynthetic process	0.10094	0.88607	0		1	b0487
	GO:0000390	spliceosomal complex disassembly	0.10094	0.88607	0		1	b3928
	GO:0005684	U2-type spliceosomal complex	0.10094	0.88607	0		1	b3928
	GO:0032988	ribonucleoprotein complex disassembly	0.10094	0.88607	0		1	b3928
	GO:0051382	kinetochore assembly	0.10094	0.88607	0		1	b3928
	GO:0051383	kinetochore organization	0.10094	0.88607	0		1	b3928
	GO:0071008	U2-type post-mRNA release spliceosomal complex	0.10094	0.88607	0		1	b3928
	GO:0071014	post-mRNA release spliceosomal complex	0.10094	0.88607	0		1	b3928
	GO:0071826	ribonucleoprotein complex subunit organization	0.10094	0.88607	0		1	b3928
	GO:0042274	ribosomal small subunit biogenesis	0.10094	0.88607	1	b3170	0
	GO:0009349	riboflavin synthase complex	0.10094	0.88607	0		1	b0415
	GO:0034618	arginine binding	0.10094	0.88607	0		1	b3237
	GO:0004298	threonine-type endopeptidase activity	0.10094	0.88607	0		1	b3932
	GO:0070003	threonine-type peptidase activity	0.10094	0.88607	0		1	b3932
	GO:0004358	glutamate N-acetyltransferase activity	0.10094	0.88607	0		1	b3341
	GO:0008817	cob(I)yrinic acid a,c-diamide adenosyltransferase activity	0.10094	0.88607	0		1	b1270
	GO:0000774	adenyl-nucleotide exchange factor activity	0.10094	0.88607	0		1	b2614
	GO:0051087	chaperone binding	0.10094	0.88607	0		1	b2614
	GO:0016989	sigma factor antagonist activity	0.10095	0.88607	0		1	b2572
	GO:0006364	rRNA processing	0.10095	0.88607	3	b2608,b0948,b3167	2	b0659,b3499
	GO:0016072	rRNA metabolic process	0.10095	0.88607	3	b0948,b2608,b3167	2	b0659,b3499
	GO:0009020	tRNA (guanosine-2'-O-)-methyltransferase activity	0.10096	0.88607	1	b3651	0
	GO:0043176	amine binding	0.10099	0.88607	0		1	b4401
	GO:0051090	regulation of sequence-specific DNA binding transcription factor activity	0.10104	0.88607	0		1	b0755
	GO:0004807	triose-phosphate isomerase activity	0.10107	0.88607	0		1	b3919
	GO:0016892	endoribonuclease activity, producing 3'-phosphomonoesters	0.10117	0.88607	0		1	b0611
	GO:0016894	endonuclease activity, active with either ribo- or deoxyribonucleic acids and producing 3'-phosphomonoesters	0.10117	0.88607	0		1	b0611
	GO:0033897	ribonuclease T2 activity	0.10117	0.88607	0		1	b0611
	GO:0016668	oxidoreductase activity, acting on a sulfur group of donors, NAD(P) as acceptor	0.10118	0.88607	0		1	b3635
	GO:0047134	protein-disulfide reductase activity	0.10118	0.88607	0		1	b3635
	GO:0006534	cysteine metabolic process	0.10122	0.88607	0		1	b3607
	GO:0006535	cysteine biosynthetic process from serine	0.10122	0.88607	0		1	b3607
	GO:0006563	L-serine metabolic process	0.10122	0.88607	0		1	b3607
	GO:0009001	serine O-acetyltransferase activity	0.10122	0.88607	0		1	b3607
	GO:0016412	serine O-acyltransferase activity	0.10122	0.88607	0		1	b3607
	GO:0016413	O-acetyltransferase activity	0.10122	0.88607	0		1	b3607
	GO:0019344	cysteine biosynthetic process	0.10122	0.88607	0		1	b3607
	GO:0070475	rRNA base methylation	0.1013	0.88607	0		1	b3499
	GO:0004126	cytidine deaminase activity	0.10151	0.88607	0		1	b2143
	GO:0006216	cytidine catabolic process	0.10151	0.88607	0		1	b2143
	GO:0009164	nucleoside catabolic process	0.10151	0.88607	0		1	b2143
	GO:0009972	cytidine deamination	0.10151	0.88607	0		1	b2143
	GO:0042454	ribonucleoside catabolic process	0.10151	0.88607	0		1	b2143
	GO:0046087	cytidine metabolic process	0.10151	0.88607	0		1	b2143
	GO:0046133	pyrimidine ribonucleoside catabolic process	0.10151	0.88607	0		1	b2143
	GO:0046135	pyrimidine nucleoside catabolic process	0.10151	0.88607	0		1	b2143
	GO:0072529	pyrimidine-containing compound catabolic process	0.10151	0.88607	0		1	b2143
	GO:1901658	glycosyl compound catabolic process	0.10151	0.88607	0		1	b2143
	GO:0005694	chromosome	0.10171	0.88607	1	b4064	4	b0439,b1162,b3928,b3067
	GO:0008759	UDP-3-O-[3-hydroxymyristoyl] N-acetylglucosamine deacetylase activity	0.10172	0.88607	1	b0096	0
	GO:0019213	deacetylase activity	0.10172	0.88607	1	b0096	0
	GO:0005834	heterotrimeric G-protein complex	0.1018	0.88607	0		1	b3770
	GO:0019897	extrinsic component of plasma membrane	0.1018	0.88607	0		1	b3770
	GO:0031234	extrinsic component of cytoplasmic side of plasma membrane	0.1018	0.88607	0		1	b3770
	GO:0009229	thiamine diphosphate biosynthetic process	0.10185	0.88607	0		1	b1344
	GO:0030975	thiamine binding	0.10185	0.88607	0		1	b1344
	GO:0042357	thiamine diphosphate metabolic process	0.10185	0.88607	0		1	b1344
	GO:0004418	hydroxymethylbilane synthase activity	0.1019	0.88607	0		1	b3805
	GO:0004071	aspartate-ammonia ligase activity	0.10236	0.88607	0		1	b3744
	GO:0016052	carbohydrate catabolic process	0.10296	0.88607	2	b0740,b2388	3	b4209,b4025,b2926
	GO:0006614	SRP-dependent cotranslational protein targeting to membrane	0.10358	0.88607	3	b0981,b0949,b2422	2	b3931,b2592
	GO:0045047	protein targeting to ER	0.10358	0.88607	3	b2422,b0981,b0949	2	b3931,b2592
	GO:0070972	protein localization to endoplasmic reticulum	0.10358	0.88607	3	b2422,b0949,b0981	2	b2592,b3931
	GO:0072599	establishment of protein localization to endoplasmic reticulum	0.10358	0.88607	3	b2422,b0981,b0949	2	b2592,b3931
	GO:0005665	DNA-directed RNA polymerase II, core complex	0.10413	0.88607	0		1	b1059
	GO:0004618	phosphoglycerate kinase activity	0.10501	0.88607	0		1	b2926
	GO:0007267	cell-cell signaling	0.10513	0.88607	0		1	b1280
	GO:0007268	synaptic transmission	0.10513	0.88607	0		1	b1280
	GO:0030119	AP-type membrane coat adaptor complex	0.10513	0.88607	0		1	b1280
	GO:0030597	RNA glycosylase activity	0.10513	0.88607	0		1	b1280
	GO:0030598	rRNA N-glycosylase activity	0.10513	0.88607	0		1	b1280
	GO:0033130	acetylcholine receptor binding	0.10513	0.88607	0		1	b1280
	GO:0043495	protein anchor	0.10513	0.88607	0		1	b1280
	GO:0044599	AP-5 adaptor complex	0.10513	0.88607	0		1	b1280
	GO:0019825	oxygen binding	0.1056	0.88607	0		1	b2552
	GO:0008033	tRNA processing	0.10572	0.88607	3	b2422,b0949,b0470	13	b0439,b0116,b0882,b3500,b3343,b3426,b1189,b4171,b3931,b1059,b2592,b0438,b0662
	GO:0008849	enterochelin esterase activity	0.10589	0.88607	0		1	b0585
	GO:0006694	steroid biosynthetic process	0.10701	0.89093	0		3	b4211,b0759,b2016
	GO:0008202	steroid metabolic process	0.10701	0.89093	0		3	b0759,b4211,b2016
	GO:0047487	oligogalacturonide lyase activity	0.1084	0.90028	1	b0740	0
	GO:0004399	histidinol dehydrogenase activity	0.10879	0.90125	0		1	b2020
	GO:0006259	DNA metabolic process	0.10967	0.90619	11	b0470,b2422,b4064,b0948,b2903,b0184,b0809,b3702,b0984,b2565,b4376	28	b2592,b2622,b4259,b3602,b3931,b0417,b3928,b2011,b4361,b0231,b3399,b1162,b3178,b1114,b0439,b0060,b0882,b2675,b0438,b4041,b3863,b4350,b3066,b2709,b1570,b3357,b3635,b3932
	GO:0003917	DNA topoisomerase type I activity	0.11038	0.90955	1	b4064	0
	GO:0004640	phosphoribosylanthranilate isomerase activity	0.11084	0.90955	1	b1262	0
	GO:0000003	reproduction	0.11113	0.90955	2	b0924,b3014	2	b0488,b3928
	GO:0016811	hydrolase activity, acting on carbon-nitrogen (but not peptide) bonds, in linear amides	0.11118	0.90955	2	b0096,b2507	2	b0867,b2063
	GO:0008852	exodeoxyribonuclease I activity	0.11362	0.92633	0		1	b2011
	GO:0000989	transcription factor activity, transcription factor binding	0.11393	0.92633	2	b0739,b0924	1	b2572
	GO:0005044	scavenger receptor activity	0.11519	0.92633	1	b4323	0
	GO:0005911	cell-cell junction	0.11519	0.92633	0		1	b1129
	GO:0005921	gap junction	0.11519	0.92633	0		1	b1129
	GO:0006898	receptor-mediated endocytosis	0.11519	0.92633	1	b4323	0
	GO:0038024	cargo receptor activity	0.11519	0.92633	1	b4323	0
	GO:0004455	ketol-acid reductoisomerase activity	0.11595	0.93014	0		1	b3774
	GO:0051259	protein oligomerization	0.118	0.93881	1	b0742	2	b4234,b3237
	GO:0016746	transferase activity, transferring acyl groups	0.11809	0.93881	3	b2474,b0459,b2584	10	b2463,b4014,b0586,b0487,b4041,b0002,b0720,b3341,b3607,b4340
	GO:0006081	cellular aldehyde metabolic process	0.11821	0.93881	1	b2507	2	b2029,b4014
	GO:0006612	protein targeting to membrane	0.11845	0.93881	3	b2422,b0949,b0981	2	b3931,b2592
	GO:0006613	cotranslational protein targeting to membrane	0.11845	0.93881	3	b0949,b0981,b2422	2	b2592,b3931
	GO:0004812	aminoacyl-tRNA ligase activity	0.11971	0.94576	1	b2890	6	b4129,b0893,b0680,b1136,b3744,b0026
	GO:0042592	homeostatic process	0.11991	0.94576	2	b0470,b2672	5	b0492,b3500,b4361,b3336,b0116
	GO:0016591	DNA-directed RNA polymerase II, holoenzyme	0.12034	0.94693	0		2	b3487,b1059
	GO:0006739	NADP metabolic process	0.12072	0.94768	0		2	b2615,b2029
	GO:0022402	cell cycle process	0.12165	0.95265	1	b3014	4	b0439,b1162,b3928,b4043
	GO:0043038	amino acid activation	0.1235	0.95679	1	b2890	6	b0893,b4129,b0680,b3744,b0026,b1136
	GO:0043039	tRNA aminoacylation	0.1235	0.95679	1	b2890	6	b1136,b0026,b3744,b0680,b4129,b0893
	GO:0000375	RNA splicing, via transesterification reactions	0.12362	0.95679	0		2	b3067,b3928
	GO:0000377	RNA splicing, via transesterification reactions with bulged adenosine as nucleophile	0.12362	0.95679	0		2	b3928,b3067
	GO:0000398	mRNA splicing, via spliceosome	0.12362	0.95679	0		2	b3928,b3067
	GO:0008092	cytoskeletal protein binding	0.12447	0.96021	2	b3702,b2185	1	b1162
	GO:0044712	single-organism catabolic process	0.12465	0.96021	3	b2903,b2388,b0221	5	b4025,b2143,b2154,b0480,b2926
	GO:0006793	phosphorus metabolic process	0.12513	0.96168	8	b2383,b1247,b3165,b3813,b2388,b0949,b0096,b2507	18	b4025,b2154,b2615,b0662,b2029,b2016,b1612,b2416,b0425,b0480,b1912,b4232,b1702,b1129,b1344,b1189,b2926,b2829
	GO:0004347	glucose-6-phosphate isomerase activity	0.12657	0.9705	0		1	b4025
	GO:0003995	acyl-CoA dehydrogenase activity	0.12802	0.9793	1	b0221	1	b0039
	GO:0004359	glutaminase activity	0.13081	0.99	1	b2507	1	b2063
	GO:0009288	bacterial-type flagellum	0.13109	0.99	2	b3165,b3097	2	b3487,b2617
	GO:0006352	DNA-templated transcription, initiation	0.13129	0.99	1	b2741	7	b3067,b4043,b3357,b3487,b2217,b4293,b3418
	GO:0006855	drug transmembrane transport	0.1316	0.99	2	b1663,b4064	0
	GO:0015238	drug transmembrane transporter activity	0.1316	0.99	2	b4064,b1663	0
	GO:0015893	drug transport	0.1316	0.99	2	b4064,b1663	0
	GO:0090484	drug transporter activity	0.1316	0.99	2	b4064,b1663	0
	GO:0044423	virion part	0.13182	0.99	1	b4064	5	b2141,b3179,b3237,b4144,b2614
	GO:0000041	transition metal ion transport	0.13314	0.99765	2	b3168,b2566	3	b2106,b0585,b4173
	GO:0015297	antiporter activity	0.13429	1	1	b1663	2	b3210,b4065
	GO:0000990	transcription factor activity, core RNA polymerase binding	0.13598	1	1	b2741	6	b3357,b3418,b2217,b3067,b4043,b4293
	GO:0000996	core DNA-dependent RNA polymerase binding promoter specificity activity	0.13598	1	1	b2741	6	b4043,b2217,b3067,b4293,b3357,b3418
	GO:0016987	sigma factor activity	0.13598	1	1	b2741	6	b4293,b4043,b2217,b3067,b3418,b3357
	GO:0009064	glutamine family amino acid metabolic process	0.13775	1	3	b1263,b2507,b2508	3	b3341,b2063,b3237
	GO:0016861	intramolecular oxidoreductase activity, interconverting aldoses and ketoses	0.14033	1	1	b1262	2	b3919,b4025
	GO:0003682	chromatin binding	0.14142	1	0		1	b3067
	GO:0000097	sulfur amino acid biosynthetic process	0.14366	1	1	b3829	1	b3607
	GO:0000152	nuclear ubiquitin ligase complex	0.1442	1	0		1	b0473
	GO:0005680	anaphase-promoting complex	0.1442	1	0		1	b0473
	GO:0031461	cullin-RING ubiquitin ligase complex	0.1442	1	0		1	b0473
	GO:0006733	oxidoreduction coenzyme metabolic process	0.14568	1	1	b2388	4	b2926,b2029,b2615,b4025
	GO:0016875	ligase activity, forming carbon-oxygen bonds	0.14676	1	1	b2890	6	b1136,b0026,b3744,b4129,b0893,b0680
	GO:0016876	ligase activity, forming aminoacyl-tRNA and related compounds	0.14676	1	1	b2890	6	b1136,b3744,b0026,b0680,b4129,b0893
	GO:0004659	prenyltransferase activity	0.14938	1	0		3	b0882,b4171,b3187
	GO:0044710	single-organism metabolic process	0.15	1	27	b0736,b0221,b3132,b1263,b2422,b4179,b1260,b0981,b1262,b2388,b0809,b0096,b3829,b2890,b2206,b3011,b3813,b1378,b0470,b0924,b2508,b2903,b4323,b3787,b0984,b2565,b2507	94	b3187,b2016,b0118,b2732,b0893,b2592,b1779,b1136,b1271,b2615,b4249,b3607,b2552,b1687,b2210,b2011,b3942,b3931,b3433,b0425,b1539,b0231,b3500,b3178,b0039,b3774,b3894,b4175,b3956,b1912,b0487,b2290,b1114,b0439,b2463,b2154,b0438,b0873,b0872,b2133,b2520,b1059,b3426,b3226,b1189,b0529,b1570,b3924,b0759,b0680,b3357,b1380,b2063,b1656,b3923,b3635,b4015,b0243,b0674,b0662,b0417,b4361,b1162,b2143,b1324,b0026,b33…
	GO:0044430	cytoskeletal part	0.15005	1	0		5	b0893,b3928,b1162,b0439,b1612
	GO:0016407	acetyltransferase activity	0.15221	1	3	b2584,b2474,b0459	3	b3607,b3341,b0586
	GO:0055114	oxidation-reduction process	0.15357	1	9	b3011,b2206,b4323,b2903,b2508,b3787,b0924,b0221,b1378	48	b1189,b3426,b2020,b0529,b0660,b4488,b0002,b1380,b3924,b0759,b3635,b0116,b2414,b1656,b2029,b2675,b4211,b0872,b1109,b0873,b2133,b1059,b2520,b0039,b3774,b3500,b1324,b4175,b3894,b3956,b2463,b0059,b1779,b2016,b0118,b2732,b2552,b4249,b0662,b1136,b1271,b0243,b3433,b0425,b2210,b1687,b3942,b1539
	GO:0019028	viral capsid	0.15611	1	1	b4064	3	b2614,b3237,b3179
	GO:0006813	potassium ion transport	0.15662	1	2	b0847,b3787	5	b1189,b2016,b4211,b0662,b1109
	GO:0042157	lipoprotein metabolic process	0.15688	1	0		3	b0473,b3233,b0643
	GO:0051156	glucose 6-phosphate metabolic process	0.15729	1	1	b2388	1	b2029
	GO:0051301	cell division	0.1573	1	1	b3014	3	b1162,b3928,b4043
	GO:0003857	3-hydroxyacyl-CoA dehydrogenase activity	0.15734	1	1	b3787	7	b0662,b1271,b1189,b2029,b2016,b3426,b0116
	GO:0008017	microtubule binding	0.15778	1	1	b3702	1	b1162
	GO:0030001	metal ion transport	0.15994	1	5	b0847,b3168,b2566,b4376,b3787	9	b4211,b2016,b1189,b1109,b0662,b2063,b4173,b2106,b0585
	GO:0016226	iron-sulfur cluster assembly	0.15998	1	0		2	b1683,b1681
	GO:0031163	metallo-sulfur cluster assembly	0.15998	1	0		2	b1681,b1683
	GO:0046912	transferase activity, transferring acyl groups, acyl groups converted into alkyl on transfer	0.16	1	0		2	b0720,b4014
	GO:0009893	positive regulation of metabolic process	0.16075	1	2	b0742,b3097	2	b3928,b0240
	GO:0016835	carbon-oxygen lyase activity	0.1622	1	2	b1260,b0740	5	b0118,b0439,b3635,b0059,b1612
	GO:0016903	oxidoreductase activity, acting on the aldehyde or oxo group of donors	0.16236	1	1	b1378	4	b3433,b1779,b4211,b2732
	GO:0065004	protein-DNA complex assembly	0.16462	1	1	b0221	1	b3928
	GO:0071824	protein-DNA complex subunit organization	0.16462	1	1	b0221	1	b3928
	GO:0006541	glutamine metabolic process	0.16511	1	2	b1263,b2507	1	b2063
	GO:0006417	regulation of translation	0.16529	1	0		2	b1280,b4041
	GO:0010608	posttranscriptional regulation of gene expression	0.16529	1	0		2	b4041,b1280
	GO:0034248	regulation of cellular amide metabolic process	0.16529	1	0		2	b4041,b1280
	GO:0005856	cytoskeleton	0.16723	1	0		5	b1612,b0893,b1162,b3928,b0439
	GO:0010558	negative regulation of macromolecule biosynthetic process	0.16969	1	1	b0949	3	b3418,b1570,b1280
	GO:0031327	negative regulation of cellular biosynthetic process	0.16969	1	1	b0949	3	b3418,b1280,b1570
	GO:0051172	negative regulation of nitrogen compound metabolic process	0.16969	1	1	b0949	3	b3418,b1280,b1570
	GO:2000113	negative regulation of cellular macromolecule biosynthetic process	0.16969	1	1	b0949	3	b1280,b1570,b3418
	GO:0006261	DNA-dependent DNA replication	0.17243	1	1	b3702	1	b3066
	GO:0043227	membrane-bounded organelle	0.17403	1	7	b1435,b4291,b3169,b2474,b3813,b0739,b4179	13	b0473,b2592,b0231,b4350,b1059,b3928,b0755,b1129,b3293,b3067,b3487,b1094,b0439
	GO:0043231	intracellular membrane-bounded organelle	0.17403	1	7	b0739,b4179,b1435,b4291,b3169,b3813,b2474	13	b0755,b1129,b3067,b3293,b1094,b3487,b0439,b0473,b2592,b4350,b0231,b1059,b3928
	GO:0044255	cellular lipid metabolic process	0.17516	1	5	b0736,b3787,b0221,b0096,b0981	14	b0662,b1271,b1109,b2154,b2016,b3187,b2029,b1912,b4232,b3226,b1189,b3426,b3923,b0116
	GO:0031974	membrane-enclosed lumen	0.17763	1	1	b0739	4	b3487,b0439,b4350,b1059
	GO:0043233	organelle lumen	0.17763	1	1	b0739	4	b3487,b0439,b4350,b1059
	GO:0070013	intracellular organelle lumen	0.17763	1	1	b0739	4	b3487,b0439,b4350,b1059
	GO:0003871	5-methyltetrahydropteroyltriglutamate-homocysteine S-methyltransferase activity	0.17872	1	1	b3829	0
	GO:0042085	5-methyltetrahydropteroyltri-L-glutamate-dependent methyltransferase activity	0.17872	1	1	b3829	0
	GO:0006096	glycolytic process	0.17962	1	1	b2388	2	b2926,b4025
	GO:0006757	ATP generation from ADP	0.17962	1	1	b2388	2	b2926,b4025
	GO:0009135	purine nucleoside diphosphate metabolic process	0.17962	1	1	b2388	2	b2926,b4025
	GO:0009179	purine ribonucleoside diphosphate metabolic process	0.17962	1	1	b2388	2	b2926,b4025
	GO:0009185	ribonucleoside diphosphate metabolic process	0.17962	1	1	b2388	2	b4025,b2926
	GO:0046031	ADP metabolic process	0.17962	1	1	b2388	2	b4025,b2926
	GO:0006928	movement of cell or subcellular component	0.18053	1	3	b3702,b3097,b3165	2	b3487,b0893
	GO:0019079	viral genome replication	0.18121	1	0		2	b0059,b4350
	GO:0000428	DNA-directed RNA polymerase complex	0.18388	1	0		2	b1059,b3487
	GO:0030880	RNA polymerase complex	0.18388	1	0		2	b3487,b1059
	GO:0055029	nuclear DNA-directed RNA polymerase complex	0.18388	1	0		2	b3487,b1059
	GO:0000295	adenine nucleotide transmembrane transporter activity	0.18545	1	0		1	b3210
	GO:0005346	purine ribonucleotide transmembrane transporter activity	0.18545	1	0		1	b3210
	GO:0005347	ATP transmembrane transporter activity	0.18545	1	0		1	b3210
	GO:0005471	ATP:ADP antiporter activity	0.18545	1	0		1	b3210
	GO:0015211	purine nucleoside transmembrane transporter activity	0.18545	1	0		1	b3210
	GO:0015215	nucleotide transmembrane transporter activity	0.18545	1	0		1	b3210
	GO:0015216	purine nucleotide transmembrane transporter activity	0.18545	1	0		1	b3210
	GO:0015217	ADP transmembrane transporter activity	0.18545	1	0		1	b3210
	GO:0015301	anion:anion antiporter activity	0.18545	1	0		1	b3210
	GO:0015605	organophosphate ester transmembrane transporter activity	0.18545	1	0		1	b3210
	GO:0008173	RNA methyltransferase activity	0.18693	1	3	b4180,b3651,b2581	2	b3499,b3179
	GO:0006289	nucleotide-excision repair	0.18738	1	1	b0984	1	b3635
	GO:0031324	negative regulation of cellular metabolic process	0.19081	1	1	b0949	3	b3418,b1280,b1570
	GO:0009890	negative regulation of biosynthetic process	0.19094	1	1	b0949	3	b1280,b1570,b3418
	GO:0006284	base-excision repair	0.1915	1	0		2	b3635,b3357
	GO:0003779	actin binding	0.19171	1	1	b2185	0
	GO:0055036	virion membrane	0.19171	1	0		1	b2141
	GO:0016790	thiolester hydrolase activity	0.19171	1	1	b0736	0
	GO:0044550	secondary metabolite biosynthetic process	0.19171	1	0		1	b0487
	GO:0004784	superoxide dismutase activity	0.19172	1	0		1	b1656
	GO:0016721	oxidoreductase activity, acting on superoxide radicals as acceptor	0.19172	1	0		1	b1656
	GO:0004482	mRNA (guanine-N7-)-methyltransferase activity	0.19174	1	0		1	b3179
	GO:0004484	mRNA guanylyltransferase activity	0.19174	1	0		1	b3179
	GO:0006370	7-methylguanosine mRNA capping	0.19174	1	0		1	b3179
	GO:0008174	mRNA methyltransferase activity	0.19174	1	0		1	b3179
	GO:0000087	mitotic M phase	0.19194	1	0		1	b1162
	GO:0000090	mitotic anaphase	0.19194	1	0		1	b1162
	GO:0000279	M phase	0.19194	1	0		1	b1162
	GO:0005874	microtubule	0.19194	1	0		1	b1162
	GO:0005876	spindle microtubule	0.19194	1	0		1	b1162
	GO:0022403	cell cycle phase	0.19194	1	0		1	b1162
	GO:0044848	biological phase	0.19194	1	0		1	b1162
	GO:0051322	anaphase	0.19194	1	0		1	b1162
	GO:0098763	mitotic cell cycle phase	0.19194	1	0		1	b1162
	GO:0009070	serine family amino acid biosynthetic process	0.19197	1	0		1	b3607
	GO:0015099	nickel cation transmembrane transporter activity	0.19199	1	0		1	b2106
	GO:0015675	nickel cation transport	0.19199	1	0		1	b2106
	GO:0035444	nickel cation transmembrane transport	0.19199	1	0		1	b2106
	GO:0004834	tryptophan synthase activity	0.19199	1	1	b1260	0
	GO:0008170	N-methyltransferase activity	0.192	1	2	b3132,b0948	1	b3179
	GO:0003906	DNA-(apurinic or apyrimidinic site) lyase activity	0.1921	1	0		1	b3635
	GO:0003879	ATP phosphoribosyltransferase activity	0.19231	1	0		1	b2019
	GO:0006732	coenzyme metabolic process	0.19239	1	4	b0949,b1247,b2388,b2507	6	b2615,b0529,b4025,b1344,b2029,b2926
	GO:0009898	cytoplasmic side of plasma membrane	0.19249	1	0		1	b3770
	GO:0098552	side of membrane	0.19249	1	0		1	b3770
	GO:0098562	cytoplasmic side of membrane	0.19249	1	0		1	b3770
	GO:0008374	O-acyltransferase activity	0.19274	1	0		1	b3607
	GO:0004146	dihydrofolate reductase activity	0.1935	1	0		1	b0660
	GO:0044446	intracellular organelle part	0.19417	1	3	b4179,b3813,b0739	11	b3487,b0439,b3928,b4350,b1612,b3067,b1059,b0893,b2592,b1162,b0473
	GO:0005985	sucrose metabolic process	0.19483	1	1	b4179	0
	GO:0016157	sucrose synthase activity	0.19483	1	1	b4179	0
	GO:0031304	intrinsic component of mitochondrial inner membrane	0.19483	1	1	b4179	0
	GO:0031305	integral component of mitochondrial inner membrane	0.19483	1	1	b4179	0
	GO:0032592	integral component of mitochondrial membrane	0.19483	1	1	b4179	0
	GO:0098573	intrinsic component of mitochondrial membrane	0.19483	1	1	b4179	0
	GO:0006635	fatty acid beta-oxidation	0.1951	1	1	b0221	0
	GO:0009062	fatty acid catabolic process	0.1951	1	1	b0221	0
	GO:0019395	fatty acid oxidation	0.1951	1	1	b0221	0
	GO:0033539	fatty acid beta-oxidation using acyl-CoA dehydrogenase	0.1951	1	1	b0221	0
	GO:0034440	lipid oxidation	0.1951	1	1	b0221	0
	GO:0016860	intramolecular oxidoreductase activity	0.19593	1	1	b1262	2	b4025,b3919
	GO:0006397	mRNA processing	0.19671	1	0		3	b3067,b3928,b3179
	GO:0005839	proteasome core complex	0.19722	1	0		1	b3932
	GO:0010629	negative regulation of gene expression	0.19791	1	1	b0949	3	b1570,b1280,b3418
	GO:0010393	galacturonan metabolic process	0.19848	1	1	b0740	0
	GO:0016837	carbon-oxygen lyase activity, acting on polysaccharides	0.19848	1	1	b0740	0
	GO:0045488	pectin metabolic process	0.19848	1	1	b0740	0
	GO:0045490	pectin catabolic process	0.19848	1	1	b0740	0
	GO:0004451	isocitrate lyase activity	0.19932	1	0		1	b4015
	GO:0002252	immune effector process	0.19943	1	0		1	b1067
	GO:0051607	defense response to virus	0.19943	1	0		1	b1067
	GO:0030682	evasion or tolerance of host defense response	0.19947	1	0		1	b4401
	GO:0044413	avoidance of host defenses	0.19947	1	0		1	b4401
	GO:0044415	evasion or tolerance of host defenses	0.19947	1	0		1	b4401
	GO:0051807	evasion or tolerance of defense response of other organism involved in symbiotic interaction	0.19947	1	0		1	b4401
	GO:0051832	avoidance of defenses of other organism involved in symbiotic interaction	0.19947	1	0		1	b4401
	GO:0051834	evasion or tolerance of defenses of other organism involved in symbiotic interaction	0.19947	1	0		1	b4401
	GO:0052173	response to defenses of other organism involved in symbiotic interaction	0.19947	1	0		1	b4401
	GO:0052200	response to host defenses	0.19947	1	0		1	b4401
	GO:0075136	response to host	0.19947	1	0		1	b4401
	GO:0016272	prefoldin complex	0.20312	1	0		1	b3928
	GO:0022411	cellular component disassembly	0.20315	1	1	b3169	1	b3928
	GO:0032984	macromolecular complex disassembly	0.20315	1	1	b3169	1	b3928
	GO:0003777	microtubule motor activity	0.20332	1	1	b3702	0
	GO:0007018	microtubule-based movement	0.20332	1	1	b3702	0
	GO:0006059	hexitol metabolic process	0.20393	1	1	b3132	0
	GO:0019402	galactitol metabolic process	0.20393	1	1	b3132	0
	GO:0006304	DNA modification	0.2049	1	2	b2903,b0948	2	b3932,b4350
	GO:0031554	regulation of DNA-templated transcription, termination	0.20577	1	1	b3169	0
	GO:0043244	regulation of protein complex disassembly	0.20577	1	1	b3169	0
	GO:0035556	intracellular signal transduction	0.20602	1	5	b2566,b3168,b4375,b0949,b2422	8	b3210,b4173,b2217,b4401,b3405,b2592,b1129,b1130
	GO:0005643	nuclear pore	0.20656	1	0		1	b2592
	GO:0016043	cellular component organization	0.20669	1	12	b3014,b0981,b0924,b4179,b0949,b4064,b2422,b3169,b0470,b0221,b3165,b0742	14	b3067,b0439,b3237,b1683,b1162,b4043,b4361,b1681,b3928,b0014,b3129,b3931,b4234,b2592
	GO:0006090	pyruvate metabolic process	0.20684	1	1	b2388	2	b4025,b2926
	GO:0030170	pyridoxal phosphate binding	0.20931	1	0		6	b2379,b4340,b2290,b0928,b2810,b0154
	GO:0044422	organelle part	0.21121	1	3	b0739,b3813,b4179	12	b0893,b1162,b2592,b0473,b2617,b3487,b3928,b0439,b4350,b1059,b3067,b1612
	GO:0043169	cation binding	0.21211	1	10	b2384,b3546,b1653,b3132,b1378,b4469,b3829,b3011,b2206,b4376	28	b0932,b3178,b2096,b2143,b3894,b0026,b0487,b3237,b0585,b1687,b1612,b3066,b1129,b1741,b2020,b0015,b4488,b2105,b2019,b3635,b1656,b2509,b4383,b3336,b0438,b1829,b2520,b2106
	GO:0003922	GMP synthase (glutamine-hydrolyzing) activity	0.21217	1	1	b2507	0
	GO:0006177	GMP biosynthetic process	0.21217	1	1	b2507	0
	GO:0046037	GMP metabolic process	0.21217	1	1	b2507	0
	GO:0016459	myosin complex	0.21458	1	0		1	b1612
	GO:0006629	lipid metabolic process	0.21761	1	5	b0221,b3787,b0736,b0981,b0096	17	b0586,b2029,b2016,b3187,b4211,b0662,b2154,b1109,b1271,b0759,b0116,b3923,b3226,b1189,b3426,b4232,b1912
	GO:0005158	insulin receptor binding	0.2182	1	0		1	b3418
	GO:0016887	ATPase activity	0.22022	1	10	b0470,b1247,b0809,b3813,b2566,b0924,b1246,b0949,b4289,b2422	15	b3486,b4350,b3931,b0438,b2592,b1323,b0059,b1303,b0882,b0879,b4173,b0439,b0488,b2709,b3178
	GO:0008924	malate dehydrogenase (quinone) activity	0.22046	1	0		1	b2210
	GO:0006826	iron ion transport	0.22062	1	2	b3168,b2566	2	b0585,b4173
	GO:0006979	response to oxidative stress	0.22195	1	0		2	b3942,b3293
	GO:0007059	chromosome segregation	0.22205	1	2	b0221,b0924	2	b1162,b0439
	GO:0007017	microtubule-based process	0.22312	1	1	b3702	2	b1162,b0439
	GO:0003896	DNA primase activity	0.22446	1	0		1	b3066
	GO:0006269	DNA replication, synthesis of RNA primer	0.22446	1	0		1	b3066
	GO:0030163	protein catabolic process	0.22553	1	1	b0984	2	b3932,b0881
	GO:0008610	lipid biosynthetic process	0.22684	1	3	b0736,b0096,b0981	10	b1912,b0662,b1109,b4211,b3426,b3187,b2016,b3923,b0116,b0759
	GO:0072657	protein localization to membrane	0.22706	1	3	b2422,b0981,b0949	2	b3931,b2592
	GO:0090150	establishment of protein localization to membrane	0.22706	1	3	b2422,b0981,b0949	2	b3931,b2592
	GO:0016874	ligase activity	0.22859	1	4	b3162,b2507,b2890,b0184	11	b0417,b4575,b0680,b4129,b0586,b0893,b0674,b1109,b1136,b3744,b0026
	GO:0031683	G-protein beta/gamma-subunit complex binding	0.22968	1	1	b0949	2	b4173,b3931
	GO:0000151	ubiquitin ligase complex	0.23076	1	0		1	b0473
	GO:0004970	ionotropic glutamate receptor activity	0.23236	1	1	b0811	1	b1920
	GO:0005230	extracellular ligand-gated ion channel activity	0.23236	1	1	b0811	1	b1920
	GO:0005231	excitatory extracellular ligand-gated ion channel activity	0.23236	1	1	b0811	1	b1920
	GO:0005234	extracellular-glutamate-gated ion channel activity	0.23236	1	1	b0811	1	b1920
	GO:0008066	glutamate receptor activity	0.23236	1	1	b0811	1	b1920
	GO:0016620	oxidoreductase activity, acting on the aldehyde or oxo group of donors, NAD or NADP as acceptor	0.23284	1	0		3	b4211,b3433,b1779
	GO:0004375	glycine dehydrogenase (decarboxylating) activity	0.23289	1	1	b2903	0
	GO:0006546	glycine catabolic process	0.23289	1	1	b2903	0
	GO:0009071	serine family amino acid catabolic process	0.23289	1	1	b2903	0
	GO:0016642	oxidoreductase activity, acting on the CH-NH2 group of donors, disulfide as acceptor	0.23289	1	1	b2903	0
	GO:0045892	negative regulation of transcription, DNA-templated	0.23372	1	1	b0949	2	b3418,b1570
	GO:0051253	negative regulation of RNA metabolic process	0.23372	1	1	b0949	2	b1570,b3418
	GO:1902679	negative regulation of RNA biosynthetic process	0.23372	1	1	b0949	2	b1570,b3418
	GO:1903507	negative regulation of nucleic acid-templated transcription	0.23372	1	1	b0949	2	b3418,b1570
	GO:0016832	aldehyde-lyase activity	0.235	1	1	b3132	1	b2096
	GO:0005654	nucleoplasm	0.23674	1	1	b0739	2	b3487,b1059
	GO:0044451	nucleoplasm part	0.23674	1	1	b0739	2	b1059,b3487
	GO:0048870	cell motility	0.23797	1	2	b3097,b3165	2	b3487,b0893
	GO:0051674	localization of cell	0.23797	1	2	b3097,b3165	2	b0893,b3487
	GO:0043566	structure-specific DNA binding	0.23865	1	3	b2422,b4201,b0809	1	b1570
	GO:0019385	methanogenesis, from acetate	0.2393	1	0		1	b4488
	GO:0031981	nuclear lumen	0.23963	1	1	b0739	3	b1059,b0439,b3487
	GO:0051276	chromosome organization	0.24026	1	4	b0470,b0924,b4064,b0221	2	b4361,b3928
	GO:0010605	negative regulation of macromolecule metabolic process	0.24278	1	1	b0949	3	b1280,b1570,b3418
	GO:0033176	proton-transporting V-type ATPase complex	0.24877	1	0		1	b3928
	GO:0033179	proton-transporting V-type ATPase, V0 domain	0.24877	1	0		1	b3928
	GO:0016625	oxidoreductase activity, acting on the aldehyde or oxo group of donors, iron-sulfur protein as acceptor	0.24877	1	0		1	b2732
	GO:0006165	nucleoside diphosphate phosphorylation	0.25251	1	1	b2388	2	b2926,b4025
	GO:0046939	nucleotide phosphorylation	0.25251	1	1	b2388	2	b4025,b2926
	GO:0008484	sulfuric ester hydrolase activity	0.25549	1	2	b3546,b4178	1	b4575
	GO:0046872	metal ion binding	0.25559	1	9	b4469,b3829,b3011,b2206,b4376,b2384,b3546,b1653,b3132	26	b3066,b1129,b1741,b2020,b0015,b4488,b2105,b2019,b3635,b1656,b3336,b4383,b0438,b1829,b2106,b2520,b0932,b2096,b3178,b2143,b3894,b0026,b0487,b0585,b1687,b1612
	GO:0070925	organelle assembly	0.25593	1	0		2	b3067,b3928
	GO:0016491	oxidoreductase activity	0.26125	1	9	b2206,b3011,b2508,b2903,b4323,b3787,b0924,b1378,b0221	45	b0529,b2020,b3426,b1189,b1656,b0116,b3635,b0759,b3924,b1380,b4488,b0002,b0660,b0873,b1109,b0872,b4211,b2675,b2029,b0069,b1059,b2133,b4175,b3894,b1324,b2096,b3500,b3774,b0039,b2463,b1271,b0243,b1136,b2552,b4249,b0662,b2732,b2016,b1779,b1539,b3942,b2210,b1687,b0425,b3433
	GO:0072594	establishment of protein localization to organelle	0.26212	1	3	b0981,b0949,b2422	2	b3931,b2592
	GO:0045934	negative regulation of nucleobase-containing compound metabolic process	0.26221	1	1	b0949	2	b3418,b1570
	GO:0048522	positive regulation of cellular process	0.26271	1	2	b0742,b3097	2	b3928,b0240
	GO:0009892	negative regulation of metabolic process	0.26614	1	1	b0949	3	b1280,b1570,b3418
	GO:0000096	sulfur amino acid metabolic process	0.26713	1	1	b3829	1	b3607
	GO:0044802	single-organism membrane organization	0.26725	1	3	b0981,b0949,b2422	2	b2592,b3931
	GO:1902494	catalytic complex	0.26807	1	2	b4376,b0470	5	b3487,b0415,b3770,b1059,b0473
	GO:0046915	transition metal ion transmembrane transporter activity	0.27006	1	2	b3168,b2566	2	b2106,b4173
	GO:0004474	malate synthase activity	0.27295	1	0		1	b4014
	GO:0006097	glyoxylate cycle	0.27295	1	0		1	b4014
	GO:0046487	glyoxylate metabolic process	0.27295	1	0		1	b4014
	GO:0010035	response to inorganic substance	0.27335	1	0		1	b0487
	GO:0010038	response to metal ion	0.27335	1	0		1	b0487
	GO:0006801	superoxide metabolic process	0.27335	1	0		1	b1656
	GO:0072593	reactive oxygen species metabolic process	0.27335	1	0		1	b1656
	GO:0004017	adenylate kinase activity	0.27335	1	0		1	b0643
	GO:0008192	RNA guanylyltransferase activity	0.27337	1	0		1	b3179
	GO:0070568	guanylyltransferase activity	0.27337	1	0		1	b3179
	GO:0000777	condensed chromosome kinetochore	0.27343	1	0		2	b1162,b0439
	GO:0000779	condensed chromosome, centromeric region	0.27343	1	0		2	b1162,b0439
	GO:0000793	condensed chromosome	0.27343	1	0		2	b1162,b0439
	GO:0000940	condensed chromosome outer kinetochore	0.27343	1	0		2	b1162,b0439
	GO:0006276	plasmid maintenance	0.27346	1	0		1	b3357
	GO:0031109	microtubule polymerization or depolymerization	0.27355	1	0		1	b1162
	GO:0031110	regulation of microtubule polymerization or depolymerization	0.27355	1	0		1	b1162
	GO:0032886	regulation of microtubule-based process	0.27355	1	0		1	b1162
	GO:0070507	regulation of microtubule cytoskeleton organization	0.27355	1	0		1	b1162
	GO:0004488	methylenetetrahydrofolate dehydrogenase (NADP+) activity	0.27481	1	0		1	b0529
	GO:0003951	NAD+ kinase activity	0.27523	1	0		1	b2615
	GO:0006741	NADP biosynthetic process	0.27523	1	0		1	b2615
	GO:0008108	UDP-glucose:hexose-1-phosphate uridylyltransferase activity	0.27557	1	0		1	b0529
	GO:0008375	acetylglucosaminyltransferase activity	0.27609	1	1	b2385	0
	GO:0008839	4-hydroxy-tetrahydrodipicolinate reductase	0.27629	1	0		2	b4211,b1779
	GO:0000275	mitochondrial proton-transporting ATP synthase complex, catalytic core F(1)	0.27707	1	1	b3813	0
	GO:0019898	extrinsic component of membrane	0.27708	1	0		1	b3770
	GO:0003942	N-acetyl-gamma-glutamyl-phosphate reductase activity	0.2783	1	0		1	b3433
	GO:0007186	G-protein coupled receptor signaling pathway	0.27858	1	1	b0949	3	b3770,b3931,b4173
	GO:0010383	cell wall polysaccharide metabolic process	0.27941	1	0		1	b4209
	GO:0010410	hemicellulose metabolic process	0.27941	1	0		1	b4209
	GO:0045491	xylan metabolic process	0.27941	1	0		1	b4209
	GO:0045493	xylan catabolic process	0.27941	1	0		1	b4209
	GO:0046559	alpha-glucuronidase activity	0.27941	1	0		1	b4209
	GO:0016846	carbon-sulfur lyase activity	0.28003	1	0		1	b2379
	GO:0008380	RNA splicing	0.28003	1	0		2	b3067,b3928
	GO:0006526	arginine biosynthetic process	0.28083	1	0		1	b3341
	GO:0060590	ATPase regulator activity	0.28098	1	0		1	b2614
	GO:0046914	transition metal ion binding	0.2814	1	5	b3829,b2384,b2206,b1653,b3132	16	b3066,b0932,b3178,b1741,b2096,b2020,b0015,b3894,b2143,b0026,b0585,b3635,b3336,b0438,b1829,b2520
	GO:0016278	lysine N-methyltransferase activity	0.28217	1	1	b3132	0
	GO:0016279	protein-lysine N-methyltransferase activity	0.28217	1	1	b3132	0
	GO:0018024	histone-lysine N-methyltransferase activity	0.28217	1	1	b3132	0
	GO:0042054	histone methyltransferase activity	0.28217	1	1	b3132	0
	GO:0006098	pentose-phosphate shunt	0.28297	1	0		1	b2029
	GO:0016301	kinase activity	0.28354	1	6	b0949,b2388,b3165,b3702,b1247,b0809	11	b0643,b2926,b1129,b1702,b3178,b3931,b4171,b1612,b3210,b2592,b2615
	GO:0033036	macromolecule localization	0.28402	1	7	b3652,b2422,b3300,b0740,b2672,b0949,b0981	7	b2592,b3233,b0473,b2154,b3931,b3928,b0643
	GO:0004506	squalene monooxygenase activity	0.28434	1	0		1	b0662
	GO:0031514	motile cilium	0.28457	1	0		1	b0893
	GO:0016774	phosphotransferase activity, carboxyl group as acceptor	0.2847	1	0		1	b2926
	GO:0047474	long-chain fatty acid luciferin component ligase activity	0.2849	1	1	b0184	0
	GO:0006664	glycolipid metabolic process	0.28622	1	1	b0096	2	b3923,b2154
	GO:1901565	organonitrogen compound catabolic process	0.28667	1	1	b2903	3	b0867,b2154,b2143
	GO:0004470	malic enzyme activity	0.28697	1	0		1	b2463
	GO:0004471	malate dehydrogenase (decarboxylating) (NAD+) activity	0.28697	1	0		1	b2463
	GO:0000314	organellar small ribosomal subunit	0.28741	1	0		1	b4350
	GO:0005763	mitochondrial small ribosomal subunit	0.28741	1	0		1	b4350
	GO:0015935	small ribosomal subunit	0.28741	1	0		1	b4350
	GO:0008199	ferric iron binding	0.28812	1	0		2	b2520,b3336
	GO:0015631	tubulin binding	0.28961	1	1	b3702	1	b1162
	GO:0016709	oxidoreductase activity, acting on paired donors, with incorporation or reduction of molecular oxygen, NAD(P)H as one donor, and incorporation of one atom of oxygen	0.29094	1	0		2	b0662,b0116
	GO:0016209	antioxidant activity	0.29123	1	0		3	b3942,b1324,b1656
	GO:0043565	sequence-specific DNA binding	0.29236	1	2	b4440,b3702	14	b1477,b3602,b4293,b2516,b4396,b3010,b3928,b1827,b3021,b0080,b1570,b2709,b0956,b1303
	GO:0044272	sulfur compound biosynthetic process	0.29424	1	2	b3829,b2508	2	b1344,b3607
	GO:0019012	virion	0.29455	1	1	b4064	5	b2614,b4144,b2141,b3179,b3237
	GO:0044763	single-organism cellular process	0.30004	1	43	b0742,b4159,b0984,b1634,b2587,b2388,b0845,b0809,b1262,b0096,b0221,b1263,b0736,b1260,b4179,b3415,b1084,b2566,b3787,b3702,b2508,b2903,b3295,b2507,b3014,b2565,b3813,b0470,b3169,b3168,b0924,b4375,b3165,b1663,b3829,b2890,b0949,b3132,b0457,b3097,b0981,b2422,b4064	95	b0480,b1109,b3336,b4488,b0415,b0116,b1129,b3547,b0488,b4232,b2217,b3129,b0417,b3770,b1130,b0662,b3487,b3237,b0059,b4014,b0882,b1162,b0026,b2106,b0680,b3357,b3635,b4015,b3426,b3226,b0529,b2210,b0014,b3931,b4043,b0893,b2016,b1271,b4401,b1136,b3607,b3500,b3178,b3956,b1978,b0586,b2379,b4041,b4211,b2029,b4025,b1270,b0002,b2019,b3067,b2020,b3744,b3928,b1280,b4361,b3210,b4065,b3405,b0674,b4129,b2926,b41…
	GO:0006812	cation transport	0.30038	1	5	b3787,b2566,b3168,b4376,b0847	11	b2106,b3928,b0662,b1109,b2016,b4065,b4211,b0585,b4173,b2063,b1189
	GO:0016901	oxidoreductase activity, acting on the CH-OH group of donors, quinone or similar compound as acceptor	0.30164	1	0		1	b2210
	GO:0051186	cofactor metabolic process	0.30271	1	5	b0949,b0809,b1247,b2388,b2507	8	b0529,b2615,b2154,b4025,b1344,b3774,b2029,b2926
	GO:0033365	protein localization to organelle	0.30348	1	3	b0981,b0949,b2422	2	b2592,b3931
	GO:0001522	pseudouridine synthesis	0.30397	1	1	b3166	2	b0059,b0058
	GO:0008757	S-adenosylmethionine-dependent methyltransferase activity	0.30514	1	2	b3651,b3132	3	b3932,b3499,b3179
	GO:0016638	oxidoreductase activity, acting on the CH-NH2 group of donors	0.30661	1	3	b2508,b2903,b0924	0
	GO:0003697	single-stranded DNA binding	0.30713	1	2	b2422,b4201	0
	GO:0001514	selenocysteine incorporation	0.30758	1	0		1	b4041
	GO:0006451	translational readthrough	0.30758	1	0		1	b4041
	GO:0005801	cis-Golgi network	0.30845	1	0		1	b3928
	GO:0016482	cytoplasmic transport	0.30973	1	3	b2422,b0981,b0949	2	b2592,b3931
	GO:0006544	glycine metabolic process	0.31038	1	1	b2903	0
	GO:0019867	outer membrane	0.3112	1	4	b3014,b0470,b3506,b4291	4	b2617,b3928,b1379,b0814
	GO:0009132	nucleoside diphosphate metabolic process	0.31147	1	1	b2388	2	b4025,b2926
	GO:0019087	transformation of host cell by virus	0.31149	1	1	b2278	0
	GO:0048523	negative regulation of cellular process	0.3115	1	1	b0949	3	b1570,b1280,b3418
	GO:0050661	NADP binding	0.31212	1	0		4	b2029,b0002,b0425,b0116
	GO:0071949	FAD binding	0.31225	1	0		6	b0662,b1059,b0116,b1109,b1189,b2210
	GO:0048583	regulation of response to stimulus	0.31233	1	1	b3165	1	b3293
	GO:1903509	liposaccharide metabolic process	0.31273	1	2	b0981,b0096	2	b3923,b2154
	GO:0005819	spindle	0.31284	1	0		2	b1162,b0439
	GO:0015276	ligand-gated ion channel activity	0.31473	1	1	b0811	1	b1920
	GO:0022834	ligand-gated channel activity	0.31473	1	1	b0811	1	b1920
	GO:0009085	lysine biosynthetic process	0.31555	1	0		2	b1779,b4211
	GO:0009089	lysine biosynthetic process via diaminopimelate	0.31555	1	0		2	b4211,b1779
	GO:0046451	diaminopimelate metabolic process	0.31555	1	0		2	b1779,b4211
	GO:0004748	ribonucleoside-diphosphate reductase activity, thioredoxin disulfide as acceptor	0.3187	1	0		1	b2675
	GO:0061731	ribonucleoside-diphosphate reductase activity	0.3187	1	0		1	b2675
	GO:0008194	UDP-glycosyltransferase activity	0.31879	1	2	b2385,b4179	0
	GO:0003712	transcription cofactor activity	0.31923	1	2	b0924,b0739	0
	GO:0018106	peptidyl-histidine phosphorylation	0.31947	1	0		1	b1129
	GO:0018202	peptidyl-histidine modification	0.31947	1	0		1	b1129
	GO:0019637	organophosphate metabolic process	0.32044	1	6	b3813,b2388,b1247,b0096,b0949,b2507	13	b2029,b2016,b4025,b2154,b0662,b2615,b0425,b0480,b1344,b1189,b1912,b4232,b2926
	GO:0005525	GTP binding	0.32153	1	8	b3168,b2566,b0809,b1247,b2422,b4375,b0949,b0981	9	b2592,b3931,b4041,b3340,b3486,b4173,b0439,b0879,b0882
	GO:0042440	pigment metabolic process	0.32232	1	0		7	b3774,b3426,b0586,b0662,b1109,b2154,b0116
	GO:0044242	cellular lipid catabolic process	0.32443	1	1	b0221	0
	GO:0046131	pyrimidine ribonucleoside metabolic process	0.3253	1	0		1	b2143
	GO:0032268	regulation of cellular protein metabolic process	0.32694	1	0		2	b1280,b4041
	GO:0016108	tetraterpenoid metabolic process	0.32724	1	0		4	b3426,b1109,b0116,b0662
	GO:0016109	tetraterpenoid biosynthetic process	0.32724	1	0		4	b3426,b0116,b1109,b0662
	GO:0016116	carotenoid metabolic process	0.32724	1	0		4	b3426,b0662,b1109,b0116
	GO:0016117	carotenoid biosynthetic process	0.32724	1	0		4	b3426,b0662,b0116,b1109
	GO:0009084	glutamine family amino acid biosynthetic process	0.32781	1	1	b2508	1	b3341
	GO:0016646	oxidoreductase activity, acting on the CH-NH group of donors, NAD or NADP as acceptor	0.32883	1	0		2	b0529,b0660
	GO:0005887	integral component of plasma membrane	0.32885	1	0		2	b1829,b0439
	GO:0031226	intrinsic component of plasma membrane	0.32885	1	0		2	b0439,b1829
	GO:1902580	single-organism cellular localization	0.32993	1	3	b0981,b0949,b2422	2	b2592,b3931
	GO:0044724	single-organism carbohydrate catabolic process	0.33081	1	1	b2388	2	b4025,b2926
	GO:0009166	nucleotide catabolic process	0.333	1	0		1	b0480
	GO:1901292	nucleoside phosphate catabolic process	0.333	1	0		1	b0480
	GO:0065003	macromolecular complex assembly	0.3339	1	3	b0221,b3165,b0742	3	b3928,b3237,b4234
	GO:0009108	coenzyme biosynthetic process	0.34016	1	3	b1247,b0949,b2507	3	b0529,b2615,b1344
	GO:0006643	membrane lipid metabolic process	0.34087	1	1	b0096	2	b2154,b3923
	GO:0005337	nucleoside transmembrane transporter activity	0.34173	1	0		1	b3210
	GO:1901505	carbohydrate derivative transporter activity	0.34173	1	0		1	b3210
	GO:0006305	DNA alkylation	0.34242	1	1	b0948	1	b3932
	GO:0006306	DNA methylation	0.34242	1	1	b0948	1	b3932
	GO:0040029	regulation of gene expression, epigenetic	0.34242	1	1	b0948	1	b3932
	GO:0044728	DNA methylation or demethylation	0.34242	1	1	b0948	1	b3932
	GO:0006879	cellular iron ion homeostasis	0.34676	1	0		1	b3336
	GO:0046916	cellular transition metal ion homeostasis	0.34676	1	0		1	b3336
	GO:0055072	iron ion homeostasis	0.34676	1	0		1	b3336
	GO:0051128	regulation of cellular component organization	0.34698	1	1	b3169	2	b1162,b3129
	GO:0000062	fatty-acyl-CoA binding	0.34704	1	0		1	b3226
	GO:0010565	regulation of cellular ketone metabolic process	0.34704	1	0		1	b3226
	GO:0019216	regulation of lipid metabolic process	0.34704	1	0		1	b3226
	GO:0019217	regulation of fatty acid metabolic process	0.34704	1	0		1	b3226
	GO:0044257	cellular protein catabolic process	0.34715	1	1	b0984	1	b3932
	GO:0051603	proteolysis involved in cellular protein catabolic process	0.34715	1	1	b0984	1	b3932
	GO:0015994	chlorophyll metabolic process	0.3475	1	0		1	b2154
	GO:0015996	chlorophyll catabolic process	0.3475	1	0		1	b2154
	GO:0047746	chlorophyllase activity	0.3475	1	0		1	b2154
	GO:0009396	folic acid-containing compound biosynthetic process	0.34807	1	0		1	b0529
	GO:0042559	pteridine-containing compound biosynthetic process	0.34807	1	0		1	b0529
	GO:0005615	extracellular space	0.34812	1	0		2	b2520,b2572
	GO:0043752	adenosylcobinamide kinase activity	0.34845	1	1	b0809	0
	GO:0004340	glucokinase activity	0.34903	1	1	b2388	0
	GO:0004396	hexokinase activity	0.34903	1	1	b2388	0
	GO:0001539	cilium or flagellum-dependent cell motility	0.34953	1	2	b3097,b3165	1	b3487
	GO:0071973	bacterial-type flagellum-dependent cell motility	0.34953	1	2	b3165,b3097	1	b3487
	GO:0097588	archaeal or bacterial-type flagellum-dependent cell motility	0.34953	1	2	b3097,b3165	1	b3487
	GO:0017148	negative regulation of translation	0.34981	1	0		1	b1280
	GO:0034249	negative regulation of cellular amide metabolic process	0.34981	1	0		1	b1280
	GO:0005576	extracellular region	0.3499	1	1	b2672	9	b4209,b0473,b3233,b0873,b2154,b0643,b0585,b2572,b2520
	GO:0046834	lipid phosphorylation	0.35083	1	0		1	b4232
	GO:0046854	phosphatidylinositol phosphorylation	0.35083	1	0		1	b4232
	GO:0000502	proteasome complex	0.35125	1	0		1	b3932
	GO:0006012	galactose metabolic process	0.35301	1	0		1	b0529
	GO:0080134	regulation of response to stress	0.3534	1	0		1	b3293
	GO:0005672	transcription factor TFIIA complex	0.35396	1	0		1	b3487
	GO:0006367	transcription initiation from RNA polymerase II promoter	0.35396	1	0		1	b3487
	GO:0044711	single-organism biosynthetic process	0.35578	1	9	b0809,b2508,b2507,b3829,b0096,b3813,b0736,b0981,b1260	27	b0586,b4025,b1109,b4211,b2019,b3923,b0116,b4488,b0415,b1270,b0759,b0529,b3744,b2020,b3426,b3433,b3607,b0674,b2615,b0662,b1779,b3187,b2016,b0487,b3341,b1912,b3774
	GO:0016877	ligase activity, forming carbon-sulfur bonds	0.35583	1	2	b3162,b0184	1	b1109
	GO:0019682	glyceraldehyde-3-phosphate metabolic process	0.35615	1	0		1	b2029
	GO:0006275	regulation of DNA replication	0.35683	1	1	b3702	0
	GO:0016836	hydro-lyase activity	0.35709	1	1	b1260	4	b1612,b0059,b0118,b0439
	GO:0019725	cellular homeostasis	0.35807	1	0		4	b3500,b0492,b3336,b0116
	GO:0009072	aromatic amino acid family metabolic process	0.3581	1	2	b1262,b1260	0
	GO:0004497	monooxygenase activity	0.35818	1	1	b2508	2	b0116,b0662
	GO:0015093	ferrous iron transmembrane transporter activity	0.35841	1	2	b3168,b2566	1	b4173
	GO:0015684	ferrous iron transport	0.35841	1	2	b2566,b3168	1	b4173
	GO:0005929	cilium	0.35901	1	0		1	b0893
	GO:0006270	DNA replication initiation	0.36043	1	1	b3702	0
	GO:0005102	receptor binding	0.36078	1	0		4	b1280,b1413,b3233,b3418
	GO:0005753	mitochondrial proton-transporting ATP synthase complex	0.362	1	1	b3813	0
	GO:0004520	endodeoxyribonuclease activity	0.3622	1	1	b2903	1	b3635
	GO:0000280	nuclear division	0.36512	1	0		1	b1162
	GO:0007067	mitotic nuclear division	0.36512	1	0		1	b1162
	GO:1901677	phosphate transmembrane transporter activity	0.36532	1	0		1	b3210
	GO:0051246	regulation of protein metabolic process	0.36566	1	0		2	b1280,b4041
	GO:0008218	bioluminescence	0.36662	1	1	b0184	0
	GO:0030258	lipid modification	0.36665	1	1	b0221	1	b4232
	GO:0032561	guanyl ribonucleotide binding	0.37048	1	8	b3168,b2566,b0809,b1247,b2422,b4375,b0949,b0981	9	b2592,b4041,b3931,b3340,b3486,b4173,b0439,b0879,b0882
	GO:0003924	GTPase activity	0.37293	1	6	b0981,b0809,b1247,b2566,b0949,b2422	7	b3486,b0882,b0879,b4173,b0439,b3931,b2592
	GO:0008964	phosphoenolpyruvate carboxylase activity	0.3733	1	0		1	b3956
	GO:0043933	macromolecular complex subunit organization	0.37358	1	4	b0742,b3169,b0221,b3165	3	b4234,b3928,b3237
	GO:0004810	tRNA adenylyltransferase activity	0.37373	1	1	b2507	0
	GO:0006897	endocytosis	0.37399	1	1	b4323	0
	GO:0005635	nuclear envelope	0.37459	1	0		1	b2592
	GO:0004176	ATP-dependent peptidase activity	0.37534	1	0		1	b0439
	GO:0006357	regulation of transcription from RNA polymerase II promoter	0.3764	1	1	b0739	0
	GO:0009247	glycolipid biosynthetic process	0.38071	1	1	b0096	1	b3923
	GO:0046467	membrane lipid biosynthetic process	0.38071	1	1	b0096	1	b3923
	GO:0030117	membrane coat	0.38334	1	0		1	b1280
	GO:0048475	coated membrane	0.38334	1	0		1	b1280
	GO:0019001	guanyl nucleotide binding	0.38361	1	8	b0981,b0949,b4375,b2422,b0809,b1247,b2566,b3168	9	b0882,b0879,b4173,b0439,b3486,b3340,b4041,b3931,b2592
	GO:0008026	ATP-dependent helicase activity	0.38444	1	0		2	b0059,b4350
	GO:0070035	purine NTP-dependent helicase activity	0.38444	1	0		2	b4350,b0059
	GO:0009081	branched-chain amino acid metabolic process	0.38449	1	0		1	b3774
	GO:0009082	branched-chain amino acid biosynthetic process	0.38449	1	0		1	b3774
	GO:0016211	ammonia ligase activity	0.38499	1	0		1	b3744
	GO:0016880	acid-ammonia (or amide) ligase activity	0.38499	1	0		1	b3744
	GO:0019031	viral envelope	0.38506	1	0		2	b2614,b4144
	GO:0036338	viral membrane	0.38506	1	0		2	b2614,b4144
	GO:0034069	aminoglycoside N-acetyltransferase activity	0.38672	1	0		1	b0586
	GO:0046353	aminoglycoside 3-N-acetyltransferase activity	0.38672	1	0		1	b0586
	GO:0015833	peptide transport	0.3876	1	2	b1247,b1246	0
	GO:0004842	ubiquitin-protein transferase activity	0.38836	1	0		1	b1413
	GO:0019787	ubiquitin-like protein transferase activity	0.38836	1	0		1	b1413
	GO:0061630	ubiquitin protein ligase activity	0.38836	1	0		1	b1413
	GO:0061659	ubiquitin-like protein ligase activity	0.38836	1	0		1	b1413
	GO:0004637	phosphoribosylamine-glycine ligase activity	0.39175	1	0		1	b0586
	GO:0006144	purine nucleobase metabolic process	0.39175	1	0		1	b0586
	GO:0009113	purine nucleobase biosynthetic process	0.39175	1	0		1	b0586
	GO:0005732	small nucleolar ribonucleoprotein complex	0.39524	1	0		1	b0059
	GO:0030515	snoRNA binding	0.39524	1	0		1	b0059
	GO:0072588	box H/ACA RNP complex	0.39524	1	0		1	b0059
	GO:0003899	DNA-directed RNA polymerase activity	0.39619	1	3	b3987,b3988,b3295	1	b3066
	GO:1902589	single-organism organelle organization	0.39734	1	2	b0470,b0924	4	b3067,b4361,b0439,b1162
	GO:0006091	generation of precursor metabolites and energy	0.39738	1	1	b2388	7	b3956,b4025,b0118,b0059,b2926,b2210,b4488
	GO:0046148	pigment biosynthetic process	0.39848	1	0		6	b0586,b3426,b3774,b1109,b0116,b0662
	GO:0006213	pyrimidine nucleoside metabolic process	0.39919	1	0		1	b2143
	GO:0006886	intracellular protein transport	0.40184	1	3	b0981,b0949,b2422	4	b2154,b3928,b2592,b3931
	GO:0016879	ligase activity, forming carbon-nitrogen bonds	0.40188	1	1	b2507	3	b0674,b3744,b0586
	GO:0006553	lysine metabolic process	0.40244	1	0		2	b1779,b4211
	GO:0006083	acetate metabolic process	0.40411	1	0		1	b4488
	GO:0006996	organelle organization	0.40438	1	5	b4064,b0470,b0924,b0221,b4179	5	b1162,b3067,b4361,b0439,b3928
	GO:0048518	positive regulation of biological process	0.40691	1	2	b3097,b0742	2	b0240,b3928
	GO:1901070	guanosine-containing compound biosynthetic process	0.40846	1	1	b2507	0
	GO:0008608	attachment of spindle microtubules to kinetochore	0.40996	1	0		1	b0439
	GO:0034453	microtubule anchoring	0.40996	1	0		1	b0439
	GO:0043531	ADP binding	0.41226	1	4	b0949,b0809,b2422,b2566	0
	GO:0016627	oxidoreductase activity, acting on the CH-CH group of donors	0.41273	1	2	b2508,b0221	5	b0069,b4211,b3774,b1779,b0039
	GO:0009372	quorum sensing	0.41277	1	1	b2672	0
	GO:0048872	homeostasis of number of cells	0.41277	1	1	b2672	0
	GO:0048874	homeostasis of number of cells in a free-living population	0.41277	1	1	b2672	0
	GO:0006873	cellular ion homeostasis	0.41279	1	0		1	b3336
	GO:0006875	cellular metal ion homeostasis	0.41279	1	0		1	b3336
	GO:0030003	cellular cation homeostasis	0.41279	1	0		1	b3336
	GO:0055076	transition metal ion homeostasis	0.41283	1	0		1	b3336
	GO:0030436	asexual sporulation	0.41305	1	0		1	b0488
	GO:0009007	site-specific DNA-methyltransferase (adenine-specific) activity	0.41336	1	0		1	b3932
	GO:0009008	DNA-methyltransferase activity	0.41336	1	0		1	b3932
	GO:0032775	DNA methylation on adenine	0.41336	1	0		1	b3932
	GO:0006787	porphyrin-containing compound catabolic process	0.41343	1	0		1	b2154
	GO:0033015	tetrapyrrole catabolic process	0.41343	1	0		1	b2154
	GO:0046149	pigment catabolic process	0.41343	1	0		1	b2154
	GO:0051187	cofactor catabolic process	0.41343	1	0		1	b2154
	GO:0008080	N-acetyltransferase activity	0.41474	1	2	b2474,b2584	2	b3341,b0586
	GO:0032269	negative regulation of cellular protein metabolic process	0.41551	1	0		1	b1280
	GO:0051248	negative regulation of protein metabolic process	0.41551	1	0		1	b1280
	GO:0016597	amino acid binding	0.41617	1	0		3	b0002,b3237,b1323
	GO:0006525	arginine metabolic process	0.41732	1	0		2	b3237,b3341
	GO:0005381	iron ion transmembrane transporter activity	0.41757	1	2	b2566,b3168	1	b4173
	GO:0009401	phosphoenolpyruvate-dependent sugar phosphotransferase system	0.41761	1	3	b2383,b3133,b2386	4	b2416,b2910,b2829,b3487
	GO:0006644	phospholipid metabolic process	0.41841	1	1	b0096	3	b4232,b1912,b2154
	GO:0016791	phosphatase activity	0.41893	1	3	b2422,b0949,b0809	4	b3931,b1413,b4232,b4361
	GO:0005667	transcription factor complex	0.41924	1	0		1	b3487
	GO:0044798	nuclear transcription factor complex	0.41924	1	0		1	b3487
	GO:0090575	RNA polymerase II transcription factor complex	0.41924	1	0		1	b3487
	GO:0016747	transferase activity, transferring acyl groups other than amino-acyl groups	0.41985	1	3	b2474,b2584,b0459	4	b3341,b3607,b0586,b0002
	GO:0003690	double-stranded DNA binding	0.42001	1	1	b0809	1	b1570
	GO:0030983	mismatched DNA binding	0.42001	1	1	b0809	1	b1570
	GO:0008565	protein transporter activity	0.42109	1	1	b0737	1	b3928
	GO:1901135	carbohydrate derivative metabolic process	0.42261	1	6	b2388,b3813,b2508,b0981,b2507,b0096	12	b0425,b0662,b2154,b4025,b2029,b2016,b0867,b1982,b3923,b2926,b2143,b1189
	GO:0004425	indole-3-glycerol-phosphate synthase activity	0.42272	1	1	b1262	0
	GO:0006050	mannosamine metabolic process	0.42318	1	1	b2508	0
	GO:0006051	N-acetylmannosamine metabolic process	0.42318	1	1	b2508	0
	GO:0047465	N-acylglucosamine-6-phosphate 2-epimerase activity	0.42318	1	1	b2508	0
	GO:0008745	N-acetylmuramoyl-L-alanine amidase activity	0.42324	1	0		1	b0867
	GO:0000313	organellar ribosome	0.42413	1	0		1	b4350
	GO:0005759	mitochondrial matrix	0.42413	1	0		1	b4350
	GO:0005761	mitochondrial ribosome	0.42413	1	0		1	b4350
	GO:0044391	ribosomal subunit	0.42413	1	0		1	b4350
	GO:0044421	extracellular region part	0.42659	1	0		2	b2572,b2520
	GO:0042822	pyridoxal phosphate metabolic process	0.42717	1	1	b2507	0
	GO:0042823	pyridoxal phosphate biosynthetic process	0.42717	1	1	b2507	0
	GO:0046184	aldehyde biosynthetic process	0.42717	1	1	b2507	0
	GO:0019748	secondary metabolic process	0.4276	1	0		1	b0487
	GO:0000226	microtubule cytoskeleton organization	0.42858	1	0		2	b0439,b1162
	GO:0006766	vitamin metabolic process	0.42865	1	3	b0809,b2508,b2507	2	b1270,b0415
	GO:0006767	water-soluble vitamin metabolic process	0.42865	1	3	b0809,b2508,b2507	2	b1270,b0415
	GO:0009110	vitamin biosynthetic process	0.42865	1	3	b2508,b2507,b0809	2	b1270,b0415
	GO:0042364	water-soluble vitamin biosynthetic process	0.42865	1	3	b2507,b2508,b0809	2	b0415,b1270
	GO:0005739	mitochondrion	0.43054	1	2	b4179,b3813	2	b4350,b1094
	GO:0035251	UDP-glucosyltransferase activity	0.43411	1	1	b4179	0
	GO:0030674	protein binding, bridging	0.43545	1	1	b2185	0
	GO:0060090	binding, bridging	0.43545	1	1	b2185	0
	GO:1901615	organic hydroxy compound metabolic process	0.4361	1	2	b3132,b2507	0
	GO:0006605	protein targeting	0.43615	1	3	b2422,b0949,b0981	2	b3931,b2592
	GO:0015977	carbon fixation	0.43676	1	0		1	b3956
	GO:0016410	N-acyltransferase activity	0.43896	1	2	b2474,b2584	2	b3341,b0586
	GO:0044780	bacterial-type flagellum assembly	0.43924	1	0		1	b3067
	GO:0006915	apoptotic process	0.43977	1	1	b3295	0
	GO:0008219	cell death	0.43977	1	1	b3295	0
	GO:0012501	programmed cell death	0.43977	1	1	b3295	0
	GO:0016265	death	0.43977	1	1	b3295	0
	GO:0045454	cell redox homeostasis	0.4402	1	0		3	b0116,b0492,b3500
	GO:0044455	mitochondrial membrane part	0.44122	1	2	b4179,b3813	0
	GO:0009982	pseudouridine synthase activity	0.44164	1	1	b3166	1	b0058
	GO:0009036	Type II site-specific deoxyribonuclease activity	0.44301	1	1	b2903	0
	GO:0015666	restriction endodeoxyribonuclease activity	0.44301	1	1	b2903	0
	GO:0060089	molecular transducer activity	0.44586	1	6	b0811,b3165,b0457,b4323,b4291,b0949	8	b4173,b3931,b3770,b3210,b1129,b0814,b0584,b1920
	GO:0070838	divalent metal ion transport	0.44675	1	2	b2566,b3168	1	b4173
	GO:0072511	divalent inorganic cation transport	0.44675	1	2	b3168,b2566	1	b4173
	GO:0009279	cell outer membrane	0.44812	1	0		2	b1379,b0814
	GO:0046677	response to antibiotic	0.4487	1	0		1	b0586
	GO:0048285	organelle fission	0.45023	1	0		1	b1162
	GO:0004611	phosphoenolpyruvate carboxykinase activity	0.45155	1	0		1	b3956
	GO:0008641	small protein activating enzyme activity	0.4527	1	1	b3162	1	b1109
	GO:0019013	viral nucleocapsid	0.45319	1	0		1	b3237
	GO:0016776	phosphotransferase activity, phosphate group as acceptor	0.45443	1	0		1	b0643
	GO:0015031	protein transport	0.45519	1	6	b0981,b3652,b2422,b0740,b3300,b0949	4	b3928,b3931,b2592,b2154
	GO:0043234	protein complex	0.4572	1	4	b3813,b0470,b4376,b0739	14	b3928,b1687,b1059,b3770,b1612,b1280,b0893,b0473,b0415,b0439,b3487,b3932,b1162,b1978
	GO:0042886	amide transport	0.46048	1	2	b1246,b1247	0
	GO:0009235	cobalamin metabolic process	0.46102	1	1	b0809	1	b1270
	GO:0009236	cobalamin biosynthetic process	0.46102	1	1	b0809	1	b1270
	GO:0004519	endonuclease activity	0.46234	1	1	b2903	4	b3635,b0611,b4539,b4350
	GO:0072525	pyridine-containing compound biosynthetic process	0.46645	1	1	b2507	1	b2615
	GO:0043648	dicarboxylic acid metabolic process	0.46664	1	1	b2508	2	b4211,b1779
	GO:0006935	chemotaxis	0.4676	1	2	b3097,b3165	1	b3487
	GO:0042330	taxis	0.4676	1	2	b3097,b3165	1	b3487
	GO:0015932	nucleobase-containing compound transmembrane transporter activity	0.46808	1	0		1	b3210
	GO:0098813	nuclear chromosome segregation	0.4696	1	0		1	b0439
	GO:0001076	transcription factor activity, RNA polymerase II transcription factor binding	0.46966	1	1	b0739	0
	GO:0001104	RNA polymerase II transcription cofactor activity	0.46966	1	1	b0739	0
	GO:0055065	metal ion homeostasis	0.4722	1	0		1	b3336
	GO:0043934	sporulation	0.47238	1	0		1	b0488
	GO:0006760	folic acid-containing compound metabolic process	0.47318	1	0		1	b0529
	GO:0008649	rRNA methyltransferase activity	0.47373	1	0		1	b3499
	GO:0055082	cellular chemical homeostasis	0.47435	1	0		1	b3336
	GO:0061024	membrane organization	0.47485	1	3	b2422,b0981,b0949	2	b2592,b3931
	GO:0019200	carbohydrate kinase activity	0.47494	1	1	b2388	0
	GO:0009966	regulation of signal transduction	0.47533	1	1	b3165	0
	GO:0010646	regulation of cell communication	0.47533	1	1	b3165	0
	GO:0023051	regulation of signaling	0.47533	1	1	b3165	0
	GO:0006777	Mo-molybdopterin cofactor biosynthetic process	0.47636	1	2	b1247,b0949	0
	GO:0019720	Mo-molybdopterin cofactor metabolic process	0.47636	1	2	b1247,b0949	0
	GO:0030694	bacterial-type flagellum basal body, rod	0.47681	1	0		1	b2617
	GO:0046907	intracellular transport	0.4787	1	3	b2422,b0949,b0981	4	b3928,b3931,b2592,b2154
	GO:0051052	regulation of DNA metabolic process	0.4806	1	1	b3702	0
	GO:0009605	response to external stimulus	0.4807	1	3	b3097,b3165,b2422	3	b4401,b1067,b3487
	GO:0006461	protein complex assembly	0.48114	1	2	b3165,b0742	3	b3928,b3237,b4234
	GO:0070271	protein complex biogenesis	0.48114	1	2	b3165,b0742	3	b3237,b3928,b4234
	GO:0009607	response to biotic stimulus	0.48173	1	1	b2508	2	b4401,b1067
	GO:0009432	SOS response	0.48265	1	1	b2422	0
	GO:0070008	serine-type exopeptidase activity	0.48326	1	2	b0740,b1845	0
	GO:0016810	hydrolase activity, acting on carbon-nitrogen (but not peptide) bonds	0.48332	1	2	b0096,b2507	3	b2063,b2143,b0867
	GO:0048519	negative regulation of biological process	0.48377	1	1	b0949	3	b1570,b1280,b3418
	GO:0045333	cellular respiration	0.48415	1	0		5	b0118,b2210,b4488,b3956,b0059
	GO:0009086	methionine biosynthetic process	0.48498	1	1	b3829	0
	GO:0016878	acid-thiol ligase activity	0.48511	1	1	b0184	0
	GO:0016054	organic acid catabolic process	0.48938	1	2	b2903,b0221	0
	GO:0044282	small molecule catabolic process	0.48938	1	2	b0221,b2903	0
	GO:0046395	carboxylic acid catabolic process	0.48938	1	2	b2903,b0221	0
	GO:0006298	mismatch repair	0.49089	1	1	b0809	1	b1570
	GO:0000154	rRNA modification	0.49131	1	1	b0948	1	b3499
	GO:0031167	rRNA methylation	0.49131	1	1	b0948	1	b3499
	GO:0071822	protein complex subunit organization	0.49196	1	3	b3165,b3169,b0742	3	b3928,b3237,b4234
	GO:0034613	cellular protein localization	0.49241	1	3	b0949,b0981,b2422	4	b2154,b3928,b3931,b2592
	GO:0070727	cellular macromolecule localization	0.49241	1	3	b2422,b0981,b0949	4	b3928,b3931,b2592,b2154
	GO:0032259	methylation	0.49439	1	1	b0948	3	b3499,b3179,b3932
	GO:0016833	oxo-acid-lyase activity	0.49526	1	0		1	b4015
	GO:0006537	glutamate biosynthetic process	0.49677	1	1	b2508	0
	GO:0015930	glutamate synthase activity	0.49677	1	1	b2508	0
	GO:0043650	dicarboxylic acid biosynthetic process	0.49677	1	1	b2508	0
	GO:0003746	translation elongation factor activity	0.49723	1	0		1	b4041
	GO:0006414	translational elongation	0.49723	1	0		1	b4041
	GO:0030031	cell projection assembly	0.49762	1	0		1	b3067
	GO:0004190	aspartic-type endopeptidase activity	0.49802	1	1	b4064	1	b0488
	GO:0070001	aspartic-type peptidase activity	0.49802	1	1	b4064	1	b0488
	GO:0031072	heat shock protein binding	0.49859	1	0		1	b0015
	GO:0009307	DNA restriction-modification system	0.49973	1	1	b2903	0
	GO:0044355	clearance of foreign intracellular DNA	0.49973	1	1	b2903	0
	GO:0015291	secondary active transmembrane transporter activity	0.50053	1	1	b1663	2	b3210,b4065
	GO:0065008	regulation of biological quality	0.50057	1	3	b2672,b0470,b2278	5	b3336,b0492,b3500,b4361,b0116
	GO:0072509	divalent inorganic cation transmembrane transporter activity	0.5011	1	2	b2566,b3168	1	b4173
	GO:0006650	glycerophospholipid metabolic process	0.50117	1	0		2	b4232,b2154
	GO:0046486	glycerolipid metabolic process	0.50117	1	0		2	b2154,b4232
	GO:0046488	phosphatidylinositol metabolic process	0.50117	1	0		2	b2154,b4232
	GO:0045184	establishment of protein localization	0.5013	1	6	b2422,b3652,b0949,b0740,b3300,b0981	4	b2592,b2154,b3928,b3931
	GO:0008168	methyltransferase activity	0.5078	1	6	b2581,b3132,b3651,b4180,b0948,b3829	3	b3932,b3179,b3499
	GO:0015630	microtubule cytoskeleton	0.50912	1	0		2	b0439,b1162
	GO:0032324	molybdopterin cofactor biosynthetic process	0.51207	1	2	b1247,b0949	0
	GO:0043545	molybdopterin cofactor metabolic process	0.51207	1	2	b0949,b1247	0
	GO:0005743	mitochondrial inner membrane	0.51233	1	2	b4179,b3813	0
	GO:0006721	terpenoid metabolic process	0.51461	1	0		4	b1109,b0116,b0662,b3426
	GO:0016114	terpenoid biosynthetic process	0.51461	1	0		4	b3426,b0116,b1109,b0662
	GO:0044459	plasma membrane part	0.51469	1	0		3	b3770,b1829,b0439
	GO:0072527	pyrimidine-containing compound metabolic process	0.51811	1	1	b2508	2	b2143,b1344
	GO:0023052	signaling	0.52043	1	7	b3168,b0457,b3165,b2566,b4375,b0949,b2422	12	b4401,b3405,b2592,b1130,b3770,b3210,b1280,b3931,b2217,b3922,b1129,b4173
	GO:0044700	single organism signaling	0.52043	1	7	b3168,b2566,b3165,b0457,b2422,b0949,b4375	12	b1130,b2592,b3405,b4401,b3931,b1280,b3210,b3770,b1129,b3922,b2217,b4173
	GO:0042578	phosphoric ester hydrolase activity	0.52181	1	3	b0809,b0949,b2422	4	b4232,b4361,b1413,b3931
	GO:0031967	organelle envelope	0.52234	1	2	b3813,b4179	1	b2592
	GO:0009452	7-methylguanosine RNA capping	0.52394	1	1	b0948	1	b3179
	GO:0036260	RNA capping	0.52394	1	1	b0948	1	b3179
	GO:0015988	energy coupled proton transmembrane transport, against electrochemical gradient	0.52536	1	0		1	b3928
	GO:0015991	ATP hydrolysis coupled proton transport	0.52536	1	0		1	b3928
	GO:0016592	mediator complex	0.52623	1	1	b0739	0
	GO:0010498	proteasomal protein catabolic process	0.5264	1	1	b0984	0
	GO:0043161	proteasome-mediated ubiquitin-dependent protein catabolic process	0.5264	1	1	b0984	0
	GO:0050801	ion homeostasis	0.52774	1	0		1	b3336
	GO:0055080	cation homeostasis	0.52774	1	0		1	b3336
	GO:0098771	inorganic ion homeostasis	0.52774	1	0		1	b3336
	GO:0019203	carbohydrate phosphatase activity	0.52829	1	0		1	b4232
	GO:0042132	fructose 1,6-bisphosphate 1-phosphatase activity	0.52829	1	0		1	b4232
	GO:0050308	sugar-phosphatase activity	0.52829	1	0		1	b4232
	GO:0009891	positive regulation of biosynthetic process	0.52901	1	0		1	b0240
	GO:0010557	positive regulation of macromolecule biosynthetic process	0.52901	1	0		1	b0240
	GO:0031328	positive regulation of cellular biosynthetic process	0.52901	1	0		1	b0240
	GO:0045893	positive regulation of transcription, DNA-templated	0.52901	1	0		1	b0240
	GO:0045935	positive regulation of nucleobase-containing compound metabolic process	0.52901	1	0		1	b0240
	GO:0051173	positive regulation of nitrogen compound metabolic process	0.52901	1	0		1	b0240
	GO:0051254	positive regulation of RNA metabolic process	0.52901	1	0		1	b0240
	GO:1902680	positive regulation of RNA biosynthetic process	0.52901	1	0		1	b0240
	GO:1903508	positive regulation of nucleic acid-templated transcription	0.52901	1	0		1	b0240
	GO:0008104	protein localization	0.52909	1	6	b0981,b3652,b2422,b0740,b3300,b0949	4	b3928,b3931,b2592,b2154
	GO:0044036	cell wall macromolecule metabolic process	0.52982	1	0		1	b4209
	GO:0004789	thiamine-phosphate diphosphorylase activity	0.53332	1	1	b2508	0
	GO:0042180	cellular ketone metabolic process	0.53413	1	0		1	b3226
	GO:0009245	lipid A biosynthetic process	0.53475	1	1	b0096	0
	GO:0046493	lipid A metabolic process	0.53475	1	1	b0096	0
	GO:1901269	lipooligosaccharide metabolic process	0.53475	1	1	b0096	0
	GO:1901271	lipooligosaccharide biosynthetic process	0.53475	1	1	b0096	0
	GO:0006066	alcohol metabolic process	0.5356	1	1	b3132	0
	GO:0019400	alditol metabolic process	0.5356	1	1	b3132	0
	GO:0019751	polyol metabolic process	0.5356	1	1	b3132	0
	GO:0015947	methane metabolic process	0.53621	1	0		1	b4488
	GO:0015948	methanogenesis	0.53621	1	0		1	b4488
	GO:0015975	energy derivation by oxidation of reduced inorganic compounds	0.53621	1	0		1	b4488
	GO:0043446	cellular alkane metabolic process	0.53621	1	0		1	b4488
	GO:0043447	alkane biosynthetic process	0.53621	1	0		1	b4488
	GO:0005506	iron ion binding	0.53729	1	0		3	b3336,b2520,b0585
	GO:0009615	response to virus	0.53741	1	0		1	b1067
	GO:0045261	proton-transporting ATP synthase complex, catalytic core F(1)	0.53777	1	1	b3813	0
	GO:0006720	isoprenoid metabolic process	0.53785	1	0		5	b3426,b3187,b0662,b1109,b0116
	GO:0008299	isoprenoid biosynthetic process	0.53785	1	0		5	b3187,b3426,b0116,b1109,b0662
	GO:0042816	vitamin B6 metabolic process	0.53789	1	1	b2507	0
	GO:0042819	vitamin B6 biosynthetic process	0.53789	1	1	b2507	0
	GO:1901617	organic hydroxy compound biosynthetic process	0.53789	1	1	b2507	0
	GO:0044429	mitochondrial part	0.54096	1	2	b4179,b3813	1	b4350
	GO:0009790	embryo development	0.54101	1	0		1	b1978
	GO:0048598	embryonic morphogenesis	0.54101	1	0		1	b1978
	GO:0072669	tRNA-splicing ligase complex	0.54101	1	0		1	b1978
	GO:0008238	exopeptidase activity	0.54419	1	3	b2384,b0740,b1845	0
	GO:0043241	protein complex disassembly	0.54425	1	1	b3169	0
	GO:0051189	prosthetic group metabolic process	0.54431	1	2	b1247,b0949	0
	GO:0016829	lyase activity	0.54568	1	6	b1260,b2903,b2508,b0740,b1262,b3132	10	b2096,b3956,b0439,b2290,b4015,b3635,b0059,b0118,b2379,b1612
	GO:0009126	purine nucleoside monophosphate metabolic process	0.54599	1	3	b2507,b2388,b3813	2	b2926,b4025
	GO:0009167	purine ribonucleoside monophosphate metabolic process	0.54599	1	3	b2388,b2507,b3813	2	b4025,b2926
	GO:0044781	bacterial-type flagellum organization	0.54711	1	0		1	b3067
	GO:0015980	energy derivation by oxidation of organic compounds	0.54931	1	0		5	b0118,b2210,b4488,b3956,b0059
	GO:0006536	glutamate metabolic process	0.54986	1	1	b2508	0
	GO:0019842	vitamin binding	0.55091	1	2	b4469,b1378	2	b4488,b1344
	GO:0019866	organelle inner membrane	0.55208	1	2	b4179,b3813	0
	GO:0004499	N,N-dimethylaniline monooxygenase activity	0.5528	1	0		1	b0116
	GO:0000049	tRNA binding	0.55282	1	1	b2890	1	b4129
	GO:0009636	response to toxic substance	0.55454	1	0		1	b0586
	GO:0070569	uridylyltransferase activity	0.55559	1	0		1	b0529
	GO:0015725	gluconate transport	0.55802	1	1	b3415	0
	GO:0034219	carbohydrate transmembrane transport	0.55802	1	1	b3415	0
	GO:0035429	gluconate transmembrane transport	0.55802	1	1	b3415	0
	GO:0051188	cofactor biosynthetic process	0.5609	1	4	b0809,b1247,b2507,b0949	4	b0529,b2615,b1344,b3774
	GO:0006505	GPI anchor metabolic process	0.56358	1	0		1	b2154
	GO:0009161	ribonucleoside monophosphate metabolic process	0.56512	1	3	b2388,b2507,b3813	2	b4025,b2926
	GO:0031300	intrinsic component of organelle membrane	0.56572	1	1	b4179	0
	GO:0031301	integral component of organelle membrane	0.56572	1	1	b4179	0
	GO:0009063	cellular amino acid catabolic process	0.56659	1	1	b2903	0
	GO:1901606	alpha-amino acid catabolic process	0.56659	1	1	b2903	0
	GO:0003911	DNA ligase (NAD+) activity	0.56945	1	0		1	b0417
	GO:1902582	single-organism intracellular transport	0.57121	1	3	b0949,b0981,b2422	2	b3931,b2592
	GO:0015298	solute:cation antiporter activity	0.57142	1	0		1	b4065
	GO:0015299	solute:proton antiporter activity	0.57142	1	0		1	b4065
	GO:0008643	carbohydrate transport	0.57439	1	4	b3133,b2383,b3415,b2386	4	b3487,b2829,b2416,b2910
	GO:0019359	nicotinamide nucleotide biosynthetic process	0.57589	1	0		1	b2615
	GO:0019363	pyridine nucleotide biosynthetic process	0.57589	1	0		1	b2615
	GO:0048878	chemical homeostasis	0.57728	1	0		1	b3336
	GO:0016705	oxidoreductase activity, acting on paired donors, with incorporation or reduction of molecular oxygen	0.57749	1	0		4	b3426,b0662,b0116,b1109
	GO:0009425	bacterial-type flagellum basal body	0.578	1	0		1	b2617
	GO:0009119	ribonucleoside metabolic process	0.57966	1	3	b3813,b2388,b2507	3	b2926,b2143,b4025
	GO:0006027	glycosaminoglycan catabolic process	0.58122	1	0		1	b0867
	GO:0009253	peptidoglycan catabolic process	0.58122	1	0		1	b0867
	GO:0006323	DNA packaging	0.58203	1	1	b0924	1	b3928
	GO:0002376	immune system process	0.58232	1	0		1	b1067
	GO:0000228	nuclear chromosome	0.58344	1	0		1	b0439
	GO:0000778	condensed nuclear chromosome kinetochore	0.58344	1	0		1	b0439
	GO:0000780	condensed nuclear chromosome, centromeric region	0.58344	1	0		1	b0439
	GO:0000794	condensed nuclear chromosome	0.58344	1	0		1	b0439
	GO:0000942	condensed nuclear chromosome outer kinetochore	0.58344	1	0		1	b0439
	GO:0042729	DASH complex	0.58344	1	0		1	b0439
	GO:0044454	nuclear chromosome part	0.58344	1	0		1	b0439
	GO:0072686	mitotic spindle	0.58344	1	0		1	b0439
	GO:0072329	monocarboxylic acid catabolic process	0.58396	1	1	b0221	0
	GO:0006771	riboflavin metabolic process	0.58432	1	0		1	b0415
	GO:0009231	riboflavin biosynthetic process	0.58432	1	0		1	b0415
	GO:0042726	flavin-containing compound metabolic process	0.58432	1	0		1	b0415
	GO:0042727	flavin-containing compound biosynthetic process	0.58432	1	0		1	b0415
	GO:0016814	hydrolase activity, acting on carbon-nitrogen (but not peptide) bonds, in cyclic amidines	0.58545	1	0		1	b2143
	GO:0043414	macromolecule methylation	0.58696	1	1	b0948	2	b3499,b3932
	GO:0015672	monovalent inorganic cation transport	0.58814	1	2	b3787,b0847	6	b3928,b1109,b0662,b2016,b4211,b1189
	GO:0010628	positive regulation of gene expression	0.58864	1	0		1	b0240
	GO:0070206	protein trimerization	0.58927	1	1	b0742	0
	GO:0016728	oxidoreductase activity, acting on CH or CH2 groups, disulfide as acceptor	0.59199	1	0		1	b2675
	GO:0018580	nitronate monooxygenase activity	0.59251	1	1	b2508	0
	GO:1901068	guanosine-containing compound metabolic process	0.59336	1	1	b2507	0
	GO:0043207	response to external biotic stimulus	0.59444	1	0		2	b1067,b4401
	GO:0051707	response to other organism	0.59444	1	0		2	b1067,b4401
	GO:0051493	regulation of cytoskeleton organization	0.59497	1	0		1	b1162
	GO:0016469	proton-transporting two-sector ATPase complex	0.59529	1	1	b3813	1	b3928
	GO:0016888	endodeoxyribonuclease activity, producing 5'-phosphomonoesters	0.5957	1	1	b2903	0
	GO:0008483	transaminase activity	0.59653	1	0		1	b0154
	GO:0016866	intramolecular transferase activity	0.59801	1	1	b3166	2	b0688,b0058
	GO:0044699	single-organism process	0.5994	1	56	b0457,b3132,b3097,b0981,b3133,b4064,b2422,b1247,b1663,b3165,b2386,b3011,b0949,b3829,b2890,b0470,b3169,b3813,b3168,b0924,b4375,b3702,b3787,b2566,b3295,b4323,b2903,b2508,b3014,b2507,b2565,b1263,b0221,b0736,b3415,b1260,b4179,b2672,b1084,b0847,b0809,b0845,b2383,b2388,b1262,b4376,b2206,b0096,b1378,b1634,b2587,b1246,b0742,b4159,b3652,b0984	125	b0231,b0425,b3433,b3942,b1687,b2011,b3602,b2615,b1779,b2592,b2732,b3187,b0118,b2463,b1114,b0439,b2290,b0487,b1912,b3922,b4175,b3774,b1059,b2520,b2133,b0872,b0873,b0438,b2154,b2910,b3923,b1656,b2063,b0759,b1570,b0492,b1189,b4361,b3210,b1280,b3928,b0674,b0243,b3405,b4065,b1982,b0585,b4173,b4129,b2926,b3341,b2143,b2416,b2379,b4041,b0586,b4025,b4211,b2675,b2029,b3067,b2019,b0002,b0660,b1270,b3744,b20…
	GO:0098800	inner mitochondrial membrane protein complex	0.6002	1	1	b3813	0
	GO:0009123	nucleoside monophosphate metabolic process	0.60199	1	3	b3813,b2507,b2388	2	b4025,b2926
	GO:0034062	RNA polymerase activity	0.60261	1	3	b3295,b3987,b3988	1	b3066
	GO:0009112	nucleobase metabolic process	0.60293	1	0		1	b0586
	GO:0046112	nucleobase biosynthetic process	0.60293	1	0		1	b0586
	GO:0015128	gluconate transmembrane transporter activity	0.60332	1	1	b3415	0
	GO:0042873	aldonate transport	0.60332	1	1	b3415	0
	GO:0042879	aldonate transmembrane transporter activity	0.60332	1	1	b3415	0
	GO:0007154	cell communication	0.60402	1	7	b0457,b2566,b3165,b3168,b0949,b4375,b2422	12	b1280,b3770,b3210,b3931,b4401,b3405,b1130,b2592,b4173,b3922,b2217,b1129
	GO:0060589	nucleoside-triphosphatase regulator activity	0.60575	1	0		1	b2614
	GO:0007165	signal transduction	0.61019	1	7	b2422,b4375,b0949,b3168,b2566,b3165,b0457	11	b1129,b2217,b3922,b4173,b2592,b1130,b4401,b3405,b3931,b3770,b3210
	GO:0005267	potassium channel activity	0.61062	1	0		1	b1114
	GO:0016758	transferase activity, transferring hexosyl groups	0.61224	1	2	b4179,b2385	1	b3923
	GO:0008654	phospholipid biosynthetic process	0.6127	1	1	b0096	1	b1912
	GO:0016755	transferase activity, transferring amino-acyl groups	0.61295	1	0		1	b0487
	GO:0009127	purine nucleoside monophosphate biosynthetic process	0.61374	1	2	b3813,b2507	0
	GO:0009168	purine ribonucleoside monophosphate biosynthetic process	0.61374	1	2	b2507,b3813	0
	GO:0031975	envelope	0.61555	1	2	b4179,b3813	4	b0814,b2592,b1379,b3928
	GO:0004672	protein kinase activity	0.61567	1	2	b3702,b3165	3	b1612,b3210,b1129
	GO:0019069	viral capsid assembly	0.61669	1	0		1	b1162
	GO:0019953	sexual reproduction	0.61947	1	1	b0924	0
	GO:0044703	multi-organism reproductive process	0.61947	1	1	b0924	0
	GO:0022836	gated channel activity	0.62088	1	1	b0811	1	b1920
	GO:0016757	transferase activity, transferring glycosyl groups	0.6211	1	3	b2385,b4179,b1263	3	b2113,b2019,b3923
	GO:0033013	tetrapyrrole metabolic process	0.62443	1	1	b0809	4	b3774,b1270,b3805,b2154
	GO:0009061	anaerobic respiration	0.62566	1	0		1	b4488
	GO:0006555	methionine metabolic process	0.62628	1	1	b3829	0
	GO:0051701	interaction with host	0.63046	1	1	b2278	1	b4401
	GO:0008172	S-methyltransferase activity	0.63075	1	1	b3829	0
	GO:0019693	ribose phosphate metabolic process	0.632	1	3	b2388,b2507,b3813	3	b4025,b2926,b2029
	GO:0065009	regulation of molecular function	0.63218	1	0		1	b0755
	GO:0007010	cytoskeleton organization	0.63368	1	0		2	b1162,b0439
	GO:0016703	oxidoreductase activity, acting on single donors with incorporation of molecular oxygen, incorporation of one atom of oxygen (internal monooxygenases or internal mixed function oxidases)	0.63375	1	1	b2508	0
	GO:0090407	organophosphate biosynthetic process	0.63583	1	5	b3813,b2507,b1247,b0096,b0949	3	b1344,b2615,b1912
	GO:0016769	transferase activity, transferring nitrogenous groups	0.63738	1	0		1	b0154
	GO:0033178	proton-transporting two-sector ATPase complex, catalytic domain	0.63869	1	1	b3813	0
	GO:0071103	DNA conformation change	0.64045	1	2	b4064,b0924	1	b3928
	GO:0009156	ribonucleoside monophosphate biosynthetic process	0.64108	1	2	b2507,b3813	0
	GO:0008653	lipopolysaccharide metabolic process	0.64129	1	1	b0981	0
	GO:0009103	lipopolysaccharide biosynthetic process	0.64129	1	1	b0981	0
	GO:0016042	lipid catabolic process	0.6415	1	1	b0221	0
	GO:0006026	aminoglycan catabolic process	0.64249	1	0		1	b0867
	GO:0004177	aminopeptidase activity	0.6428	1	1	b2384	0
	GO:0052689	carboxylic ester hydrolase activity	0.64642	1	0		2	b2154,b0026
	GO:0015629	actin cytoskeleton	0.64833	1	0		1	b1612
	GO:0004601	peroxidase activity	0.64897	1	0		1	b3942
	GO:0046527	glucosyltransferase activity	0.64962	1	1	b4179	0
	GO:0018193	peptidyl-amino acid modification	0.6503	1	0		1	b1129
	GO:0033177	proton-transporting two-sector ATPase complex, proton-transporting domain	0.65122	1	0		1	b3928
	GO:1901681	sulfur compound binding	0.65498	1	1	b1378	3	b3226,b4488,b1344
	GO:0031419	cobalamin binding	0.65745	1	1	b4469	0
	GO:0022414	reproductive process	0.65798	1	1	b0924	0
	GO:0008982	protein-N(PI)-phosphohistidine-sugar phosphotransferase activity	0.65965	1	3	b2386,b4323,b3133	0
	GO:0046034	ATP metabolic process	0.66207	1	2	b3813,b2388	2	b4025,b2926
	GO:0031406	carboxylic acid binding	0.66463	1	0		3	b0002,b3237,b1323
	GO:0043177	organic acid binding	0.66463	1	0		3	b1323,b0002,b3237
	GO:0046873	metal ion transmembrane transporter activity	0.66498	1	2	b3168,b2566	4	b2106,b1114,b4173,b2063
	GO:0051726	regulation of cell cycle	0.66847	1	0		1	b1978
	GO:0001510	RNA methylation	0.66862	1	1	b0948	1	b3499
	GO:0016830	carbon-carbon lyase activity	0.66938	1	2	b1262,b3132	3	b4015,b3956,b2096
	GO:0019048	modulation by virus of host morphology or physiology	0.66961	1	1	b2278	0
	GO:0010604	positive regulation of macromolecule metabolic process	0.6698	1	0		1	b0240
	GO:0002161	aminoacyl-tRNA editing activity	0.67022	1	0		1	b0026
	GO:0042278	purine nucleoside metabolic process	0.6704	1	3	b3813,b2388,b2507	2	b4025,b2926
	GO:0046128	purine ribonucleoside metabolic process	0.6704	1	3	b2388,b2507,b3813	2	b2926,b4025
	GO:0022804	active transmembrane transporter activity	0.67126	1	5	b3133,b1663,b4323,b2386,b4289	3	b3210,b4065,b0488
	GO:0009116	nucleoside metabolic process	0.6713	1	3	b3813,b2388,b2507	4	b2926,b2143,b4025,b1982
	GO:1901657	glycosyl compound metabolic process	0.6713	1	3	b2507,b2388,b3813	4	b1982,b2143,b4025,b2926
	GO:0042623	ATPase activity, coupled	0.67309	1	1	b4289	4	b0439,b0059,b4350,b0488
	GO:0055086	nucleobase-containing small molecule metabolic process	0.67332	1	3	b2388,b2507,b3813	8	b0480,b0586,b2926,b1982,b2029,b2615,b2143,b4025
	GO:0030030	cell projection organization	0.67494	1	0		1	b3067
	GO:0004871	signal transducer activity	0.67659	1	4	b0457,b0811,b3165,b0949	6	b3210,b3770,b3931,b4173,b1920,b1129
	GO:0042710	biofilm formation	0.67667	1	1	b0845	0
	GO:0009991	response to extracellular stimulus	0.6787	1	1	b2422	0
	GO:0031668	cellular response to extracellular stimulus	0.6787	1	1	b2422	0
	GO:0071496	cellular response to external stimulus	0.6787	1	1	b2422	0
	GO:0044462	external encapsulating structure part	0.67877	1	0		3	b3928,b1379,b0814
	GO:0016741	transferase activity, transferring one-carbon groups	0.68061	1	6	b3132,b2581,b3829,b3651,b4180,b0948	3	b3499,b3179,b3932
	GO:0044461	bacterial-type flagellum part	0.68103	1	0		1	b2617
	GO:0019083	viral transcription	0.68122	1	1	b0809	0
	GO:0006772	thiamine metabolic process	0.68502	1	1	b2508	0
	GO:0009228	thiamine biosynthetic process	0.68502	1	1	b2508	0
	GO:0042723	thiamine-containing compound metabolic process	0.68502	1	1	b2508	0
	GO:0042724	thiamine-containing compound biosynthetic process	0.68502	1	1	b2508	0
	GO:0072528	pyrimidine-containing compound biosynthetic process	0.68549	1	1	b2508	1	b1344
	GO:0006094	gluconeogenesis	0.68625	1	0		1	b4025
	GO:0019319	hexose biosynthetic process	0.68625	1	0		1	b4025
	GO:0046364	monosaccharide biosynthetic process	0.68625	1	0		1	b4025
	GO:0005740	mitochondrial envelope	0.68671	1	2	b3813,b4179	0
	GO:0031966	mitochondrial membrane	0.68671	1	2	b4179,b3813	0
	GO:0072521	purine-containing compound metabolic process	0.68792	1	3	b3813,b2507,b2388	3	b2926,b0586,b4025
	GO:0015144	carbohydrate transmembrane transporter activity	0.69068	1	4	b4323,b3133,b2386,b3415	0
	GO:1901476	carbohydrate transporter activity	0.69068	1	4	b3415,b4323,b3133,b2386	0
	GO:0009124	nucleoside monophosphate biosynthetic process	0.69097	1	2	b3813,b2507	0
	GO:0016780	phosphotransferase activity, for other substituted phosphate groups	0.69244	1	0		1	b1912
	GO:0009117	nucleotide metabolic process	0.6928	1	3	b3813,b2388,b2507	5	b2029,b4025,b2615,b2926,b0480
	GO:0004872	receptor activity	0.69339	1	3	b0811,b4323,b4291	5	b3210,b1129,b0814,b1920,b0584
	GO:0006511	ubiquitin-dependent protein catabolic process	0.69355	1	1	b0984	0
	GO:0019941	modification-dependent protein catabolic process	0.69355	1	1	b0984	0
	GO:0043632	modification-dependent macromolecule catabolic process	0.69355	1	1	b0984	0
	GO:0072522	purine-containing compound biosynthetic process	0.69421	1	2	b2507,b3813	1	b0586
	GO:0019068	virion assembly	0.6954	1	0		1	b1162
	GO:0016857	racemase and epimerase activity, acting on carbohydrates and derivatives	0.69603	1	1	b2508	0
	GO:0007005	mitochondrion organization	0.69666	1	1	b4179	0
	GO:0008028	monocarboxylic acid transmembrane transporter activity	0.69856	1	1	b3415	0
	GO:0019201	nucleotide kinase activity	0.70173	1	0		1	b0643
	GO:0042558	pteridine-containing compound metabolic process	0.70347	1	0		1	b0529
	GO:0016701	oxidoreductase activity, acting on single donors with incorporation of molecular oxygen	0.70452	1	1	b2508	0
	GO:0044003	modification by symbiont of host morphology or physiology	0.70455	1	1	b2278	0
	GO:0051817	modification of morphology or physiology of other organism involved in symbiotic interaction	0.70455	1	1	b2278	0
	GO:0042451	purine nucleoside biosynthetic process	0.70473	1	2	b2507,b3813	0
	GO:0046129	purine ribonucleoside biosynthetic process	0.70473	1	2	b2507,b3813	0
	GO:0009144	purine nucleoside triphosphate metabolic process	0.70778	1	2	b2388,b3813	2	b2926,b4025
	GO:0009199	ribonucleoside triphosphate metabolic process	0.70778	1	2	b2388,b3813	2	b2926,b4025
	GO:0009205	purine ribonucleoside triphosphate metabolic process	0.70778	1	2	b2388,b3813	2	b4025,b2926
	GO:0005984	disaccharide metabolic process	0.71265	1	1	b4179	0
	GO:0005216	ion channel activity	0.71333	1	1	b0811	2	b1114,b1920
	GO:0022838	substrate-specific channel activity	0.71333	1	1	b0811	2	b1920,b1114
	GO:0019080	viral gene expression	0.71371	1	1	b0809	0
	GO:0044262	cellular carbohydrate metabolic process	0.71421	1	3	b4179,b3132,b0981	1	b4014
	GO:0044463	cell projection part	0.71429	1	0		1	b2617
	GO:0016868	intramolecular transferase activity, phosphotransferases	0.71496	1	0		1	b0688
	GO:0012505	endomembrane system	0.71546	1	0		2	b3928,b2592
	GO:0016684	oxidoreductase activity, acting on peroxide as acceptor	0.71644	1	0		1	b3942
	GO:0006753	nucleoside phosphate metabolic process	0.7174	1	3	b2507,b2388,b3813	5	b0480,b2926,b2615,b4025,b2029
	GO:0016725	oxidoreductase activity, acting on CH or CH2 groups	0.71772	1	0		1	b2675
	GO:0033014	tetrapyrrole biosynthetic process	0.72237	1	1	b0809	3	b3805,b1270,b3774
	GO:0005783	endoplasmic reticulum	0.72287	1	0		1	b3928
	GO:0070566	adenylyltransferase activity	0.72418	1	1	b2507	0
	GO:0017038	protein import	0.72541	1	1	b3652	0
	GO:0000160	phosphorelay signal transduction system	0.72642	1	0		6	b2217,b3210,b3405,b4401,b1129,b1130
	GO:0019058	viral life cycle	0.72691	1	1	b0809	3	b1162,b4350,b0059
	GO:0003909	DNA ligase activity	0.72833	1	0		1	b0417
	GO:0034622	cellular macromolecular complex assembly	0.72889	1	2	b3165,b0221	1	b3928
	GO:0030313	cell envelope	0.72907	1	0		3	b1379,b3928,b0814
	GO:0006633	fatty acid biosynthetic process	0.72918	1	1	b0736	0
	GO:0006040	amino sugar metabolic process	0.73016	1	1	b2508	0
	GO:0000270	peptidoglycan metabolic process	0.73152	1	0		1	b0867
	GO:0030203	glycosaminoglycan metabolic process	0.73152	1	0		1	b0867
	GO:0009150	purine ribonucleotide metabolic process	0.7325	1	3	b2388,b2507,b3813	2	b4025,b2926
	GO:0098797	plasma membrane protein complex	0.73252	1	0		1	b3770
	GO:0045259	proton-transporting ATP synthase complex	0.73456	1	1	b3813	0
	GO:0035821	modification of morphology or physiology of other organism	0.73469	1	1	b2278	0
	GO:0033043	regulation of organelle organization	0.73569	1	0		1	b1162
	GO:0009141	nucleoside triphosphate metabolic process	0.73909	1	2	b3813,b2388	2	b2926,b4025
	GO:0030261	chromosome condensation	0.73911	1	1	b0924	0
	GO:0044033	multi-organism metabolic process	0.74326	1	1	b0809	0
	GO:0098798	mitochondrial protein complex	0.74436	1	1	b3813	0
	GO:0009259	ribonucleotide metabolic process	0.74617	1	3	b2507,b2388,b3813	2	b2926,b4025
	GO:0005976	polysaccharide metabolic process	0.74994	1	2	b0740,b0981	1	b4209
	GO:0016151	nickel cation binding	0.75268	1	0		1	b0015
	GO:0042995	cell projection	0.75432	1	2	b3097,b3165	3	b3487,b0893,b2617
	GO:0098542	defense response to other organism	0.75486	1	0		1	b1067
	GO:0004521	endoribonuclease activity	0.75673	1	0		1	b0611
	GO:0016192	vesicle-mediated transport	0.75863	1	1	b4323	0
	GO:0016423	tRNA (guanine) methyltransferase activity	0.75921	1	1	b3651	0
	GO:0006265	DNA topological change	0.76057	1	1	b4064	0
	GO:0006163	purine nucleotide metabolic process	0.76297	1	3	b3813,b2388,b2507	2	b2926,b4025
	GO:0051649	establishment of localization in cell	0.76592	1	3	b0949,b0981,b2422	4	b2154,b3928,b3931,b2592
	GO:0009295	nucleoid	0.76594	1	1	b0924	0
	GO:0046906	tetrapyrrole binding	0.76631	1	1	b4469	2	b2552,b3942
	GO:0042626	ATPase activity, coupled to transmembrane movement of substances	0.76634	1	1	b4289	1	b0488
	GO:0043492	ATPase activity, coupled to movement of substances	0.76634	1	1	b4289	1	b0488
	GO:0016853	isomerase activity	0.76815	1	4	b4064,b3166,b1262,b2508	4	b0688,b0058,b3919,b4025
	GO:0015079	potassium ion transmembrane transporter activity	0.76883	1	0		1	b1114
	GO:0009152	purine ribonucleotide biosynthetic process	0.76948	1	2	b2507,b3813	0
	GO:0016032	viral process	0.76968	1	2	b0809,b2278	3	b0059,b4350,b1162
	GO:0006022	aminoglycan metabolic process	0.77084	1	0		1	b0867
	GO:0005179	hormone activity	0.77098	1	0		1	b1413
	GO:0044764	multi-organism cellular process	0.77309	1	4	b0845,b2278,b2672,b0809	3	b4350,b0059,b1162
	GO:0000287	magnesium ion binding	0.77596	1	0		3	b2019,b1612,b4488
	GO:0098796	membrane protein complex	0.77747	1	1	b3813	4	b1687,b3928,b1280,b3770
	GO:0016628	oxidoreductase activity, acting on the CH-CH group of donors, NAD or NADP as acceptor	0.77904	1	0		3	b3774,b1779,b4211
	GO:0015718	monocarboxylic acid transport	0.78225	1	1	b3415	0
	GO:0008276	protein methyltransferase activity	0.78376	1	1	b3132	0
	GO:0009521	photosystem	0.78378	1	0		1	b1687
	GO:0009523	photosystem II	0.78378	1	0		1	b1687
	GO:0015399	primary active transmembrane transporter activity	0.78422	1	1	b4289	1	b0488
	GO:0015405	P-P-bond-hydrolysis-driven transmembrane transporter activity	0.78422	1	1	b4289	1	b0488
	GO:0009163	nucleoside biosynthetic process	0.78513	1	2	b3813,b2507	0
	GO:0042455	ribonucleoside biosynthetic process	0.78513	1	2	b2507,b3813	0
	GO:1901659	glycosyl compound biosynthetic process	0.78513	1	2	b3813,b2507	0
	GO:1901137	carbohydrate derivative biosynthetic process	0.78531	1	4	b3813,b2507,b0096,b0981	1	b3923
	GO:0004888	transmembrane signaling receptor activity	0.78565	1	1	b0811	1	b1920
	GO:0040011	locomotion	0.78574	1	2	b3097,b3165	2	b3487,b0893
	GO:0009260	ribonucleotide biosynthetic process	0.78722	1	2	b3813,b2507	0
	GO:0046390	ribose phosphate biosynthetic process	0.78722	1	2	b2507,b3813	0
	GO:0030976	thiamine pyrophosphate binding	0.78745	1	1	b1378	1	b4488
	GO:0009311	oligosaccharide metabolic process	0.78812	1	2	b0096,b4179	0
	GO:0071702	organic substance transport	0.79098	1	13	b3415,b0981,b3133,b0949,b1246,b2672,b2422,b3652,b2383,b1247,b3300,b0740,b2386	11	b3487,b2829,b0643,b3233,b3931,b2416,b3928,b2154,b0473,b2592,b2910
	GO:0006310	DNA recombination	0.79114	1	2	b0470,b2565	10	b4361,b0882,b3357,b3931,b0439,b0438,b3178,b2622,b1162,b2592
	GO:0005261	cation channel activity	0.79692	1	0		1	b1114
	GO:0019318	hexose metabolic process	0.80196	1	0		2	b0529,b4025
	GO:0044403	symbiosis, encompassing mutualism through parasitism	0.8022	1	2	b0809,b2278	4	b0059,b4401,b4350,b1162
	GO:0044419	interspecies interaction between organisms	0.8022	1	2	b2278,b0809	4	b4401,b4350,b0059,b1162
	GO:0042597	periplasmic space	0.8038	1	2	b0924,b0740	1	b3928
	GO:0016886	ligase activity, forming phosphoric ester bonds	0.80409	1	0		1	b0417
	GO:0098655	cation transmembrane transport	0.80424	1	0		2	b3928,b2106
	GO:0098660	inorganic ion transmembrane transport	0.80424	1	0		2	b3928,b2106
	GO:0098662	inorganic cation transmembrane transport	0.80424	1	0		2	b3928,b2106
	GO:0004866	endopeptidase inhibitor activity	0.80464	1	0		1	b2520
	GO:0030414	peptidase inhibitor activity	0.80464	1	0		1	b2520
	GO:0061134	peptidase regulator activity	0.80464	1	0		1	b2520
	GO:0061135	endopeptidase regulator activity	0.80464	1	0		1	b2520
	GO:0006164	purine nucleotide biosynthetic process	0.80833	1	2	b2507,b3813	0
	GO:0034357	photosynthetic membrane	0.80836	1	0		1	b1687
	GO:0051536	iron-sulfur cluster binding	0.80879	1	3	b4469,b3990,b2508	3	b0872,b2777,b2732
	GO:0051540	metal cluster binding	0.80879	1	3	b3990,b4469,b2508	3	b0872,b2777,b2732
	GO:0051641	cellular localization	0.80893	1	3	b2422,b0981,b0949	4	b2592,b3931,b3928,b2154
	GO:0006754	ATP biosynthetic process	0.81304	1	1	b3813	0
	GO:0043623	cellular protein complex assembly	0.82366	1	1	b3165	1	b3928
	GO:0016645	oxidoreductase activity, acting on the CH-NH group of donors	0.82517	1	0		2	b0529,b0660
	GO:0016773	phosphotransferase activity, alcohol group as acceptor	0.82698	1	7	b3702,b0809,b2388,b3133,b3165,b4323,b2386	5	b3210,b1612,b0014,b2615,b1129
	GO:0030312	external encapsulating structure	0.82819	1	0		3	b3928,b1379,b0814
	GO:0009653	anatomical structure morphogenesis	0.82951	1	0		2	b1978,b0014
	GO:0008135	translation factor activity, RNA binding	0.83112	1	0		1	b4041
	GO:0016763	transferase activity, transferring pentosyl groups	0.83181	1	0		1	b2019
	GO:0003916	DNA topoisomerase activity	0.83367	1	1	b4064	0
	GO:0016854	racemase and epimerase activity	0.84043	1	1	b2508	0
	GO:0009165	nucleotide biosynthetic process	0.84079	1	2	b2507,b3813	1	b2615
	GO:1901293	nucleoside phosphate biosynthetic process	0.84079	1	2	b2507,b3813	1	b2615
	GO:0009579	thylakoid	0.84228	1	0		1	b1687
	GO:0044436	thylakoid part	0.84228	1	0		1	b1687
	GO:0008175	tRNA methyltransferase activity	0.84302	1	1	b3651	0
	GO:0048856	anatomical structure development	0.84306	1	0		2	b1978,b0014
	GO:0072330	monocarboxylic acid biosynthetic process	0.84368	1	1	b0736	0
	GO:0006790	sulfur compound metabolic process	0.84659	1	2	b2508,b3829	2	b1344,b3607
	GO:0044767	single-organism developmental process	0.84773	1	0		3	b1978,b0488,b0014
	GO:0006952	defense response	0.84875	1	1	b2903	1	b1067
	GO:0006006	glucose metabolic process	0.85185	1	0		1	b4025
	GO:0020037	heme binding	0.85209	1	0		2	b2552,b3942
	GO:0019205	nucleobase-containing compound kinase activity	0.85531	1	0		1	b0643
	GO:0010181	FMN binding	0.8567	1	0		1	b2895
	GO:0005886	plasma membrane	0.85793	1	1	b4064	4	b0439,b3770,b2572,b1829
	GO:0015267	channel activity	0.85864	1	1	b0811	2	b1114,b1920
	GO:0022803	passive transmembrane transporter activity	0.85864	1	1	b0811	2	b1114,b1920
	GO:0009142	nucleoside triphosphate biosynthetic process	0.85978	1	1	b3813	0
	GO:0009145	purine nucleoside triphosphate biosynthetic process	0.85978	1	1	b3813	0
	GO:0009201	ribonucleoside triphosphate biosynthetic process	0.85978	1	1	b3813	0
	GO:0009206	purine ribonucleoside triphosphate biosynthetic process	0.85978	1	1	b3813	0
	GO:0015979	photosynthesis	0.8598	1	0		1	b1687
	GO:0000902	cell morphogenesis	0.86427	1	0		1	b0014
	GO:0032989	cellular component morphogenesis	0.86427	1	0		1	b0014
	GO:0016893	endonuclease activity, active with either ribo- or deoxyribonucleic acids and producing 5'-phosphomonoesters	0.86484	1	1	b2903	0
	GO:0000150	recombinase activity	0.86497	1	0		2	b0014,b3357
	GO:0006778	porphyrin-containing compound metabolic process	0.86518	1	0		2	b2154,b3774
	GO:0007275	multicellular organismal development	0.8686	1	0		1	b1978
	GO:0030288	outer membrane-bounded periplasmic space	0.86908	1	0		1	b3928
	GO:0004540	ribonuclease activity	0.8708	1	0		1	b0611
	GO:0022890	inorganic cation transmembrane transporter activity	0.87322	1	2	b3168,b2566	6	b4065,b2106,b4173,b1114,b3928,b2063
	GO:1902600	hydrogen ion transmembrane transport	0.87744	1	0		1	b3928
	GO:0032502	developmental process	0.87943	1	0		3	b0014,b0488,b1978
	GO:0042398	cellular modified amino acid biosynthetic process	0.88033	1	0		1	b0529
	GO:0005996	monosaccharide metabolic process	0.88152	1	0		2	b0529,b4025
	GO:0051704	multi-organism process	0.88676	1	5	b0924,b0809,b0845,b2278,b2672	5	b0059,b4350,b1067,b4401,b1162
	GO:0030151	molybdenum ion binding	0.891	1	1	b2206	1	b3894
	GO:0006818	hydrogen transport	0.89116	1	0		1	b3928
	GO:0015992	proton transport	0.89116	1	0		1	b3928
	GO:0008324	cation transmembrane transporter activity	0.89473	1	3	b2566,b0847,b3168	6	b4173,b1114,b3928,b2063,b2106,b4065
	GO:0044723	single-organism carbohydrate metabolic process	0.89547	1	5	b0981,b3132,b2388,b4179,b0096	4	b4014,b2926,b0529,b4025
	GO:0016667	oxidoreductase activity, acting on a sulfur group of donors	0.89609	1	0		1	b3635
	GO:0016651	oxidoreductase activity, acting on NAD(P)H	0.89644	1	0		1	b3635
	GO:0009312	oligosaccharide biosynthetic process	0.89764	1	1	b0096	0
	GO:0006811	ion transport	0.90379	1	6	b2566,b3787,b3168,b3415,b4376,b0847	11	b3928,b2106,b4211,b4065,b2016,b0662,b1109,b2063,b4173,b0585,b1189
	GO:0016831	carboxy-lyase activity	0.90812	1	1	b1262	1	b3956
	GO:0016820	hydrolase activity, acting on acid anhydrides, catalyzing transmembrane movement of substances	0.91133	1	1	b4289	1	b0488
	GO:0071944	cell periphery	0.91363	1	1	b4064	7	b2572,b3770,b1829,b1379,b0439,b3928,b0814
	GO:0019354	siroheme biosynthetic process	0.91717	1	0		1	b3774
	GO:0043115	precorrin-2 dehydrogenase activity	0.91717	1	0		1	b3774
	GO:0046156	siroheme metabolic process	0.91717	1	0		1	b3774
	GO:0033692	cellular polysaccharide biosynthetic process	0.91946	1	1	b0981	0
	GO:0005975	carbohydrate metabolic process	0.92032	1	8	b3132,b2388,b3013,b0740,b4179,b0981,b0096,b0911	12	b0014,b0688,b4209,b2509,b4025,b0008,b2926,b4014,b2696,b2096,b0529,b4232
	GO:0038023	signaling receptor activity	0.92455	1	1	b0811	3	b1129,b1920,b3210
	GO:0030234	enzyme regulator activity	0.92564	1	0		2	b2614,b2520
	GO:0006464	cellular protein modification process	0.92711	1	1	b3165	3	b1612,b0015,b1129
	GO:0036211	protein modification process	0.92711	1	1	b3165	3	b0015,b1612,b1129
	GO:0044264	cellular polysaccharide metabolic process	0.92764	1	1	b0981	0
	GO:0004857	enzyme inhibitor activity	0.92899	1	0		1	b2520
	GO:0071554	cell wall organization or biogenesis	0.92903	1	0		1	b4209
	GO:0031090	organelle membrane	0.93059	1	2	b3813,b4179	0
	GO:0016798	hydrolase activity, acting on glycosyl bonds	0.93216	1	1	b3013	3	b1280,b3635,b4209
	GO:0006783	heme biosynthetic process	0.93323	1	0		1	b3774
	GO:0006575	cellular modified amino acid metabolic process	0.93349	1	0		1	b0529
	GO:0048869	cellular developmental process	0.93401	1	0		1	b0014
	GO:0044765	single-organism transport	0.93613	1	23	b3168,b3415,b0981,b3133,b1634,b2587,b2672,b1084,b4064,b1246,b0847,b2422,b1247,b2383,b3787,b1663,b0845,b2566,b2386,b4159,b4376,b0949,b3652	23	b3931,b3928,b0662,b2592,b4065,b2016,b0585,b4173,b0643,b3487,b2106,b2416,b2133,b0473,b1109,b2910,b4211,b2829,b2063,b3233,b0488,b1189,b3547
	GO:0015078	hydrogen ion transmembrane transporter activity	0.9374	1	0		2	b3928,b4065
	GO:0000155	phosphorelay sensor kinase activity	0.93986	1	0		2	b1129,b3210
	GO:0042168	heme metabolic process	0.94002	1	0		1	b3774
	GO:1902578	single-organism localization	0.9403	1	23	b3168,b3415,b0981,b3133,b1634,b2587,b2672,b4064,b1084,b1246,b0847,b2422,b1247,b1663,b3787,b2383,b0845,b2566,b2386,b4159,b4376,b0949,b3652	23	b3931,b3928,b0662,b2592,b4065,b2016,b0585,b4173,b0643,b3487,b2106,b2416,b2133,b0473,b1109,b2910,b4211,b2829,b2063,b3233,b0488,b1189,b3547
	GO:0004673	protein histidine kinase activity	0.94967	1	0		2	b3210,b1129
	GO:0016775	phosphotransferase activity, nitrogenous group as acceptor	0.94967	1	0		2	b3210,b1129
	GO:0006779	porphyrin-containing compound biosynthetic process	0.95197	1	0		1	b3774
	GO:0034637	cellular carbohydrate biosynthetic process	0.95359	1	1	b0981	0
	GO:0005575	cellular_component	0.95951	1	63	b2890,b3310,b2185,b4200,b3986,b2386,b3165,b1663,b1245,b3298,b2423,b3304,b4064,b3133,b0981,b3097,b3300,b0457,b0169,b3014,b4323,b3305,b2508,b3506,b0737,b2566,b3294,b0739,b0924,b3306,b3168,b3813,b3299,b3169,b0470,b4376,b3303,b3307,b0740,b0811,b2606,b0845,b2672,b1084,b4179,b3415,b3297,b2424,b3652,b3101,b4159,b0742,b3983,b2385,b3296,b1244,b2587,b4289,b1634,b3546,b4291,b1435,b2474	78	b2063,b1094,b3293,b2154,b0873,b2133,b1059,b2520,b3343,b1912,b0439,b2617,b2592,b3187,b1920,b3433,b1687,b0231,b1480,b2020,b3744,b4261,b3067,b2019,b4209,b4041,b3342,b1829,b4173,b4129,b0585,b2141,b4065,b3448,b3928,b4144,b3210,b1280,b4140,b0113,b0755,b0680,b3401,b3635,b3932,b4350,b2106,b3178,b2614,b1978,b0643,b0893,b3607,b1136,b3179,b1612,b4043,b1237,b3547,b1129,b3233,b0488,b0415,b4142,b0473,b0814,b05…
	GO:0015075	ion transmembrane transporter activity	0.96024	1	5	b0811,b2566,b3415,b0847,b3168	8	b4173,b1114,b3928,b2063,b3210,b2106,b4065,b1920
	GO:0005057	receptor signaling protein activity	0.96241	1	0		2	b3210,b1129
	GO:0000271	polysaccharide biosynthetic process	0.9626	1	1	b0981	0
	GO:0098772	molecular function regulator	0.96619	1	0		2	b2614,b2520
	GO:0044707	single-multicellular organism process	0.9668	1	0		1	b1978
	GO:0022892	substrate-specific transporter activity	0.96691	1	9	b0811,b2566,b4323,b2386,b3168,b0737,b3133,b3415,b0847	8	b3928,b3210,b2106,b4065,b1920,b2063,b4173,b1114
	GO:0022891	substrate-specific transmembrane transporter activity	0.96818	1	8	b3133,b3415,b0847,b2566,b0811,b2386,b4323,b3168	8	b2063,b1114,b4173,b3928,b2106,b3210,b4065,b1920
	GO:0016051	carbohydrate biosynthetic process	0.97016	1	2	b0981,b0096	1	b4025
	GO:0051179	localization	0.97242	1	37	b3787,b2566,b0737,b4323,b4159,b3652,b3168,b4291,b1634,b1246,b4289,b2587,b1244,b0739,b1663,b2383,b0845,b1245,b1247,b0809,b3165,b0740,b2386,b4376,b0949,b2424,b3300,b3097,b3415,b0981,b3133,b4064,b1084,b2672,b2422,b2423,b0847	33	b2416,b1109,b0584,b0473,b0814,b4211,b3035,b1323,b0488,b3233,b3547,b3210,b3928,b0662,b4065,b0585,b3487,b4173,b2106,b2133,b2154,b0438,b2910,b2829,b2063,b1413,b2709,b1189,b3931,b2016,b0893,b2592,b0643
	GO:0022857	transmembrane transporter activity	0.97425	1	13	b3168,b4323,b2386,b0845,b1663,b0811,b2566,b4289,b2587,b4064,b0847,b3415,b3133	10	b1920,b4065,b3210,b2106,b3928,b0488,b3547,b2063,b4173,b1114
	GO:0015077	monovalent inorganic cation transmembrane transporter activity	0.97679	1	0		3	b1114,b3928,b4065
	GO:0034220	ion transmembrane transport	0.9776	1	1	b3415	2	b3928,b2106
	GO:0032501	multicellular organismal process	0.9778	1	0		1	b1978
	GO:0006810	transport	0.97829	1	35	b0809,b1247,b1245,b0845,b1663,b2383,b0740,b2386,b4376,b0949,b2424,b3300,b0981,b3415,b3133,b2672,b4064,b1084,b0847,b2423,b2422,b3787,b2566,b0737,b4323,b4159,b3652,b3168,b4291,b1634,b2587,b4289,b1246,b0739,b1244	32	b2106,b2133,b0438,b2154,b2910,b2063,b2829,b2709,b1413,b1189,b3931,b2592,b2016,b0643,b2416,b0814,b0473,b0584,b1109,b3035,b4211,b1323,b3233,b0488,b3547,b3210,b3928,b0662,b4065,b0585,b4173,b3487
	GO:0008514	organic anion transmembrane transporter activity	0.97845	1	1	b3415	1	b3210
	GO:0015074	DNA integration	0.97977	1	0		1	b2622
	GO:0051234	establishment of localization	0.97978	1	35	b2424,b3300,b3133,b0981,b3415,b0847,b2423,b2422,b2672,b1084,b4064,b1247,b0809,b1245,b0845,b2383,b1663,b2386,b0740,b4376,b0949,b4291,b3168,b1634,b0739,b1244,b2587,b4289,b1246,b2566,b3787,b4323,b0737,b4159,b3652	32	b3931,b2592,b2016,b0643,b2133,b2106,b2910,b0438,b2154,b2063,b2829,b1189,b2709,b1413,b3928,b3210,b4065,b0662,b4173,b3487,b0585,b2416,b3035,b4211,b0814,b0473,b0584,b1109,b1323,b3547,b3233,b0488
	GO:0098656	anion transmembrane transport	0.98903	1	1	b3415	0
	GO:1903825	organic acid transmembrane transport	0.98903	1	1	b3415	0
	GO:0008509	anion transmembrane transporter activity	0.98967	1	1	b3415	1	b3210
	GO:0004553	hydrolase activity, hydrolyzing O-glycosyl compounds	0.99121	1	1	b3013	1	b4209
	GO:0009055	electron carrier activity	0.99363	1	0		2	b2732,b0872
	GO:0016021	integral component of membrane	0.99536	1	12	b0742,b0845,b2566,b3101,b3168,b0457,b2587,b4064,b3415,b3546,b1634,b4179	22	b1829,b2572,b2106,b0755,b0488,b1129,b3547,b3067,b2063,b4261,b3448,b0662,b2141,b4065,b3187,b4043,b3210,b3928,b1687,b3178,b4173,b0439
	GO:0031224	intrinsic component of membrane	0.99556	1	12	b0457,b3168,b3415,b4179,b3546,b1634,b4064,b2587,b0845,b2566,b0742,b3101	22	b3210,b4043,b1687,b3928,b3448,b0662,b4065,b3187,b2141,b4173,b0439,b3178,b2106,b1829,b2572,b3067,b4261,b2063,b0488,b0755,b3547,b1129
	GO:0071705	nitrogen compound transport	0.99563	1	2	b1246,b1247	0
	GO:0005342	organic acid transmembrane transporter activity	0.99633	1	1	b3415	0
	GO:0046943	carboxylic acid transmembrane transporter activity	0.99633	1	1	b3415	0
	GO:0044425	membrane part	0.99642	1	13	b0742,b0845,b2566,b3101,b3168,b0457,b3813,b4064,b2587,b3415,b4179,b1634,b3546	24	b2106,b2572,b1829,b0755,b0488,b1129,b3547,b3067,b2063,b4261,b0662,b3448,b4065,b3187,b2141,b1280,b4043,b3770,b3210,b1687,b3928,b3178,b4173,b0439
	GO:0055085	transmembrane transport	0.99753	1	8	b2587,b4064,b1084,b3415,b4159,b1634,b1663,b0845	8	b0488,b3547,b2063,b3487,b4065,b2106,b3928,b2133
	GO:0004803	transposase activity	0.99867	1	0		1	b1162
	GO:0006313	transposition, DNA-mediated	0.99955	1	0		1	b1162
	GO:0032196	transposition	0.99955	1	0		1	b1162
	GO:0015711	organic anion transport	0.99963	1	1	b3415	0
	GO:0015849	organic acid transport	0.99963	1	1	b3415	0
	GO:0046942	carboxylic acid transport	0.99963	1	1	b3415	0
	GO:0005215	transporter activity	0.99986	1	16	b4289,b2587,b4064,b0739,b0847,b3415,b3133,b1634,b0737,b3168,b4323,b2386,b1663,b0845,b0811,b2566	11	b0488,b3547,b4173,b1114,b2063,b1920,b3035,b4065,b3210,b2106,b3928
	GO:0006820	anion transport	0.99988	1	1	b3415	0
	GO:0016020	membrane	0.99998	1	36	b2386,b3165,b0811,b1663,b0845,b1245,b3097,b3300,b2424,b0457,b2423,b4064,b1084,b4179,b3415,b0981,b4323,b3506,b0737,b0742,b2566,b2385,b3652,b3101,b4159,b3014,b4291,b3168,b3813,b0470,b1244,b0739,b2587,b4289,b3546,b1634	35	b2133,b2106,b4140,b0755,b2063,b3187,b1920,b1687,b4043,b3178,b1912,b2617,b0439,b0584,b0814,b1379,b3486,b1829,b2572,b3547,b1129,b0488,b4261,b3067,b4065,b2141,b3448,b0662,b3928,b1280,b3210,b3770,b3487,b4173,b0879
